# Supplementary material for: Influenza-like illness in acute myocardial infarction patients during the winter wave of the influenza A H1N1 pandemic in London: a case–control study
Source: PubMed Central journal article supplement — BMJ Open. 2013 May 2;3(5):e002604. doi: 10.1136/bmjopen-2013-002604 (PMC3646184; doi:10.1136/bmjopen-2013-002604), 2013-05-02
Supplement: bmjopen-2013-002604.draft_revisions.pdf [file bmjopen-2013-002604.draft_revisions.pdf]

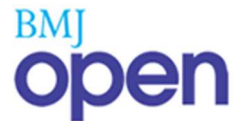

**Influenza-like illness in acute myocardial infarction patients during the winter wave of the influenza A H1N1 pandemic in London: a case control study**

|                                 |                                                                                                                                                                                                                                                                                                                                                                                                                                                                                                                                      |
|---------------------------------|--------------------------------------------------------------------------------------------------------------------------------------------------------------------------------------------------------------------------------------------------------------------------------------------------------------------------------------------------------------------------------------------------------------------------------------------------------------------------------------------------------------------------------------|
| Journal:                        | <i>BMJ Open</i>                                                                                                                                                                                                                                                                                                                                                                                                                                                                                                                      |
| Manuscript ID:                  | bmjopen-2013-002604                                                                                                                                                                                                                                                                                                                                                                                                                                                                                                                  |
| Article Type:                   | Research                                                                                                                                                                                                                                                                                                                                                                                                                                                                                                                             |
| Date Submitted by the Author:   | 16-Jan-2013                                                                                                                                                                                                                                                                                                                                                                                                                                                                                                                          |
| Complete List of Authors:       | Warren-Gash, Charlotte; UCL, Research Department of Infection & Population Health<br>Geretti, Anna Maria; University of Liverpool, Institute of Infection and Global Health<br>Hamilton, George; Royal Free London Foundation Trust, Department of Vascular Surgery<br>Rakhit, Roby; Royal Free London Foundation Trust, Department of Cardiology<br>Smeeth, Liam; London School of Hygiene and Tropical Medicine, Epidemiology and Population Health<br>Hayward, Andrew; University College London, Infection and Population Health |
| <b>Primary Subject Heading</b>: | Epidemiology                                                                                                                                                                                                                                                                                                                                                                                                                                                                                                                         |
| Secondary Subject Heading:      | Infectious diseases, Cardiovascular medicine                                                                                                                                                                                                                                                                                                                                                                                                                                                                                         |
| Keywords:                       | Myocardial infarction < CARDIOLOGY, Epidemiology < INFECTIOUS DISEASES, PUBLIC HEALTH                                                                                                                                                                                                                                                                                                                                                                                                                                                |
|                                 |                                                                                                                                                                                                                                                                                                                                                                                                                                                                                                                                      |

SCHOLARONE™  
Manuscripts

1  
2  
3 **Title** Influenza-like illness in acute myocardial infarction patients during the winter wave of the influenza  
4  
5 A H1N1 pandemic in London: a case control study  
6  
7

8  
9 **Authors** Charlotte Warren-Gash<sup>1</sup>, Anna Maria Geretti<sup>2</sup>, George Hamilton<sup>3</sup>, Roby D. Rakhit<sup>4</sup>, Liam  
10  
11 Smeeth<sup>5</sup>, Andrew C. Hayward<sup>1</sup>  
12  
13

14  
15 **Affiliations**

16  
17 <sup>1</sup>Centre for Infectious Disease Epidemiology, Research Department of Infection & Population Health,  
18  
19 UCL, London, UK  
20

21  
22 <sup>2</sup> Institute of Infection and Global Health, University of Liverpool, UK  
23

24  
25 <sup>3</sup> Department of Vascular Surgery, Royal Free London Foundation Trust, London, UK  
26

27  
28 <sup>4</sup> Department of Cardiology, Royal Free London Foundation Trust, London, UK  
29

30  
31 <sup>5</sup> Department of Non-Communicable Disease Epidemiology, London School of Hygiene & Tropical  
32  
33 Medicine, London, UK  
34  
35

36  
37 **Corresponding author**

38  
39 Dr Charlotte Warren-Gash

40  
41 Research Department of Infection & Population Health

42  
43 1<sup>st</sup> Floor, Royal Free Hospital

44  
45 Rowland Hill Street

46  
47 London NW3 2PF

48  
49 Email: [c.warren-gash@ucl.ac.uk](mailto:c.warren-gash@ucl.ac.uk) / [charlotte.warren-gash@doctors.org.uk](mailto:charlotte.warren-gash@doctors.org.uk)  
50  
51

52  
53 Tel: 020 7794 0500 x36720 Fax: 020 7794 1224  
54  
55

56  
57 **Word Count** Abstract 296, main text 2109 (excluding article summary, tables, figures, legends and refs)  
58  
59  
60

**ABSTRACT**

**Objective:** To investigate recent respiratory and influenza-like illnesses in acute myocardial infarction patients compared to patients hospitalised for acute non vascular surgical conditions during the second wave of the 2009 influenza A H1N1 pandemic

**Design:** Case control study

**Setting:** Coronary care unit, acute cardiology and acute surgical admissions wards in a major teaching hospital in London, UK

**Participants:** 134 participants (70 cases and 64 controls) aged  $\geq 40$  years hospitalised for acute myocardial infarction and acute surgical conditions between 21/09/2009 and 28/02/2010, frequency-matched for gender, 5-year age-band and admission week

**Primary exposure:** Influenza-like illness (ILI - defined as feeling feverish with either cough or sore throat) within the last month. **Secondary exposures:** Acute respiratory illness within the last month not meeting ILI criteria; nasopharyngeal and throat swab positive for influenza virus

**Results:** 29 participants of 134 (21.6%) reported respiratory illness within the last month, of whom 13 (9.7%) had illnesses meeting ILI criteria. The most frequently reported category for timing of respiratory symptom onset was 8-14 days before admission (31.0% of illnesses). Cases were more likely than controls to report ILI – adjusted OR 3.17 (95% confidence interval 0.61-16.47) – as well as other key respiratory symptoms, and were less likely to have received influenza vaccination – adjusted OR 0.46 (95% CI, 0.19-1.12) – although differences were not statistically significant. No swabs were positive for influenza virus.

**Conclusions:** This study was supportive of the hypothesis that recent ILI was more common in patients hospitalised with acute myocardial infarction than with acute surgical conditions during the second wave of the influenza A H1N1 pandemic, and suggestive of a cardio-protective effect of influenza vaccination. It was, however, underpowered, partly because the age groups typically affected by acute

1  
2  
3 myocardial infarction had low rates of infection with the pandemic influenza strain compared to  
4  
5 seasonal influenza.  
6  
7  
8  
9

## 10 **ARTICLE SUMMARY**

### 11 **Article focus**

- 12 • Seasonal influenza can trigger cardiovascular complications but the cardiac effects of the 2009  
13 influenza pandemic are less clear.
- 14 • We aimed to investigate recent influenza-like illness in patients hospitalised with acute  
15 myocardial infarction and surgical conditions during the 2009 influenza pandemic in London.  
16  
17  
18  
19  
20  
21  
22  
23

### 24 **Key messages**

- 25 • 14.3% of patients hospitalised with acute myocardial infarction (cases) reported recent  
26 influenza-like illness compared to 4.7% of patients hospitalised for acute surgical conditions  
27 (controls)
- 28 • Cases were more likely than controls to report a range of recent respiratory symptoms and less  
29 likely to have received influenza vaccination though differences were not statistically significant  
30  
31  
32
- 33 • The median age of cases with acute myocardial infarction was 63.6 years, whereas the majority  
34 of people infected with pandemic influenza strain nationally were young  
35  
36  
37  
38  
39  
40  
41  
42

### 43 **Strengths and limitations**

- 44 • The study was underpowered to detect an effect, partly due to low infection rates with the  
45 pandemic influenza virus in age-groups typically affected by acute myocardial infarction, but it  
46 will inform design of future similar studies  
47  
48  
49  
50  
51  
52  
53  
54  
55  
56  
57  
58  
59  
60

## INTRODUCTION

Seasonal influenza can trigger cardiovascular complications and deaths in vulnerable populations, especially the elderly and those with underlying medical conditions<sup>1</sup>. Evidence to support the hypothesis that seasonal influenza may trigger acute myocardial infarction comes from a range of observational studies incorporating the effects of different circulating influenza strains and subtypes<sup>2</sup>. In a pandemic situation, however, when there is global spread of a novel influenza strain, clinical and demographic profiles of those affected may change dramatically.

The most recent influenza pandemic was caused by an influenza A H1N1 strain (H1N1pdm09) that emerged in Mexico and the United States in April 2009<sup>3,4</sup>. The UK experienced several waves of infection with this novel strain - a first wave occurred in spring and summer 2009 followed by a second wave in the winter of 2009/10 and a post-pandemic wave in winter 2010/11<sup>5</sup>. Initial evidence from the first wave in the UK suggested that typical illnesses were mild and affected mainly children and young people<sup>6</sup>. The average age of cases increased over subsequent waves of the pandemic<sup>7</sup> but it is unclear how this affected clinical illness profiles. Vaccination coverage did not reach high levels until the post-pandemic season.

There have been reports of myocarditis, myocardial injury and left ventricular systolic dysfunction in patients with severe H1N1pdm09<sup>8,9</sup>. It has been suggested that H1N1pdm09 was associated with higher rates of extra-pulmonary complications than seasonal influenza<sup>10</sup> but this is difficult to compare as surveillance of severe influenza-related disease was greatly enhanced during the pandemic. A recent mathematical modelling study estimated that globally there were 83,300 cardiovascular deaths associated with the first twelve months of H1N1pdm09 circulation in adults aged >17 years<sup>11</sup>, but the contribution of myocardial infarction deaths to this figure is unknown.

1  
2  
3 In this study we aimed to investigate whether patients hospitalised for acute myocardial infarction  
4 during the winter wave of the influenza A H1N1 pandemic were more likely than surgical patients to  
5 have experienced recent influenza-like illness or acute respiratory illness, or to have concurrent PCR  
6 positive influenza or evidence of influenza A IgA antibodies in sera.  
7  
8  
9  
10  
11

## 12 13 **METHODS**

### 14 15 **Setting, design and participants**

16  
17  
18 This was an observational case control study carried out in hospital in-patients at the Royal Free London  
19 NHS Foundation Trust between 21<sup>st</sup> September 2009 and 28<sup>th</sup> February 2010. Cases were patients aged  
20 ≥40 years who had experienced an acute myocardial infarction (defined as a rise in troponin T with  
21 ischaemic symptoms and/or typical ECG changes, or by angiographic evidence of acute coronary artery  
22 thrombosis during primary percutaneous coronary intervention). Controls were patients aged ≥40 years  
23 admitted with an acute surgical condition such as appendicitis, bowel or urinary obstruction and no  
24 history of myocardial infarction within the past month, frequency matched for gender, age-group in 5  
25 year age-bands and week of admission. All were English-speaking and able to provide written informed  
26 consent.  
27  
28  
29  
30  
31  
32  
33  
34  
35  
36  
37  
38  
39  
40

### 41 42 **Exposures**

43  
44 The main exposure was recent influenza-like illness, defined as a history of feeling feverish with either  
45 cough or sore throat within the last month. We also used the exposure recent acute respiratory  
46 infection to capture a history of respiratory illness within the last month with any of the following  
47 symptoms – fever, chills, dry cough, productive cough, myalgia, rhinorrhoea, blocked nose, sore throat,  
48 wheeze, earache and fatigue – that did not meet criteria for influenza-like illness. Additional exposures  
49 were nasopharyngeal and throat swabs testing positive for influenza by real-time polymerase chain  
50  
51  
52  
53  
54  
55  
56  
57  
58  
59  
60

1  
2  
3 reaction (PCR), presence of IgA antibodies to influenza A in serum samples and self-reported influenza  
4  
5 vaccination status.  
6  
7

### 8 9 **Data sources and measurement**

10  
11 We used a questionnaire to investigate recent respiratory and influenza-like illness as well as to collect  
12  
13 data on demographics, medical history and influenza vaccination status. Medical records were reviewed  
14  
15 for details of the current admission and to confirm data on potential confounding factors. Combined  
16  
17 nasopharyngeal and throat swabs were taken from each participant, placed in viral transport medium  
18  
19 and transported to the laboratory for storage at -80°C. Samples were tested for the presence of  
20  
21 influenza virus RNA using a validated in house real-time PCR with a lower limit of detection of 1 RNA  
22  
23 copy per reaction, as previously described<sup>12</sup>. A single serum sample was taken for quantification of IgA  
24  
25 antibodies to influenza A as a marker of recent exposure. Serum samples were centrifuged, frozen at -  
26  
27 80°C and batch tested using a commercially available enzyme-linked immunosorbent assay (EIA) for  
28  
29 influenza A IgA (Biosupply UK, cat no. RE56501). Antibody concentrations were initially explored as a  
30  
31 continuous variable, then categorised into 'positive' (>12 U/ml), 'equivocal' (8-12 U/ml) and 'negative'  
32  
33 (>8 U/ml) categories based on standard laboratory thresholds. Equivocal results were dropped for  
34  
35 analyses.  
36  
37  
38  
39  
40  
41  
42

### 43 **Statistical methods**

44  
45 All analyses were carried out using Stata (*Stata Statistical Software: Release 12. College Station, TX:*  
46  
47 *StataCorp LP*). Baseline comparability between cases and controls was assessed with  $X^2$  tests.  
48  
49 Characteristics of participants with and without missing data were also compared using  $X^2$  tests to  
50  
51 assess any risk of bias associated with missing data. We used multivariable logistic regression analysis to  
52  
53 investigate associations between recent influenza-like illness or acute respiratory illness exposures and  
54  
55 case/ control status, controlling for age-group, gender, month of admission and influenza vaccination  
56  
57  
58  
59  
60

1  
2  
3 status (all models) and other potential confounding factors. These were examined using a backwards  
4  
5 stepwise approach whereby factors independently associated with both exposure and outcome were  
6  
7 included in models and likelihood ratio tests used to assess the effect of removing each one  
8  
9  
10 sequentially. If p values from likelihood ratio tests were <0.1 then factors were retained in the model.  
11

## 12 13 **RESULTS**

### 14 15 **Characteristics of study participants**

16  
17  
18 134 participants were recruited, comprising 70 cases and 64 controls, for whom acceptance rates were  
19  
20 66% and 67% respectively. Median age was 63.6 years (IQR 53.3-72.6) and 21% of participants were  
21  
22 female. Cases were more likely to be of Asian or Asian British ethnicity (p=0.016), to have a previous  
23  
24 history of myocardial infarction (p=0.04) or a family history of myocardial infarction (p<0.001) than  
25  
26 controls. Of the 70 patients hospitalised for acute myocardial infarction, 48 (68.5%) met criteria for ST-  
27  
28 elevation myocardial infarction, 17 (24.3%) had a non ST-elevation myocardial infarction and in 5 (7.1%)  
29  
30 cases the subtype of myocardial infarction was unspecified. Control patients were admitted with a  
31  
32 range of acute non-vascular surgical presentations that included colorectal, urological and orthopaedic  
33  
34 conditions.  
35  
36  
37  
38  
39  
40

### 41 42 **Table 1**

### 43 44 **Timing of participants' admissions in relation to national influenza circulation**

45  
46  
47 A comparison of study participants' dates of admission with national rates of GP consultations for  
48  
49 influenza-like illness (ILI) based on RCGP surveillance data is shown in figure 1. The peak week for ILI  
50  
51 consultations in England was week 43 (ending 25<sup>th</sup> October 2009) when the rate was 42.8 per 100,000.  
52  
53  
54 This was also the peak week for influenza virus circulation according to data from virological sentinel  
55  
56  
57  
58  
59  
60



1  
2  
3 surveillance schemes, when the proportion of positive samples reached 41.2%. Our recruitment period  
4  
5 spanned this period of peak influenza circulation.  
6  
7

### 8 9 **Figure 1**

#### 10 **Recent respiratory and influenza-like illness**

11  
12  
13  
14 17 cases (24.3%) and 12 controls (18.8%) reported respiratory illness in the month preceding hospital  
15 admission. 13 illnesses – reported by 10 cases (14.3%) and 3 controls (4.7%) – met criteria for influenza-  
16 like illness (defined as feeling feverish with cough and/or sore throat). The most frequently reported  
17 category for the timing of respiratory symptom onset was 8-14 days before admission (31.0% of  
18 illnesses). 4-7 days was the most frequently reported category for length of illness (37.9% of illnesses).  
19  
20 Symptom profiles of participants reporting recent respiratory illness are shown in figure 2. No swabs  
21 tested positive for influenza virus nucleic acid. Serum samples were available on 113 of 134 participants  
22 (84.3%). There were no significant differences in characteristics of participants with and without missing  
23 serum samples (data not shown). 25 cases (43.1%) and 28 controls (50.9%) tested positive for serum  
24 influenza A IgA antibodies. 62% of participants who were seropositive had received influenza  
25 vaccination compared to 31% of seronegative participants.  
26  
27  
28  
29  
30  
31  
32  
33  
34  
35  
36  
37  
38  
39

### 40 **Figure 2**

41  
42  
43 Cases were more likely to have reported influenza-like illness than controls – adjusted OR 3.17 (95%  
44 confidence interval 0.61-16.47) – as well as other key respiratory illness symptoms, although differences  
45 were not statistically significant. There was also a trend towards a protective effect of influenza  
46 vaccination against myocardial infarction – adjusted OR 0.46 (95% CI, 0.19-1.12). Results from the  
47  
48  
49  
50  
51  
52 logistic regression analysis are summarised in table 2.  
53  
54

### 55 **Table 2**

## DISCUSSION

The study was supportive of the hypothesis that recent respiratory and in particular influenza-like illnesses occurring during the second wave of the influenza A H1N1 pandemic were more common in patients hospitalised with acute myocardial infarction than with acute surgical conditions. Influenza vaccination was also associated with protection against myocardial infarction, although differences were not statistically significant. While we had hypothesised that more adults would be infected during the second pandemic wave due to the expected upwards shift in age distribution of infections, national rates of influenza-like illness remained low<sup>5</sup>, especially in age groups typically affected by acute myocardial infarction. The study was therefore underpowered to detect an effect, partly due to limited numbers of infections among participants.

Using self-reported recent respiratory and influenza-like illness as exposures introduced the possibility of reporting or recall bias. Nonetheless this method allows greater sensitivity to detect recent respiratory symptoms than relying on reports of medically attended illnesses, which comprise only a small minority of influenza cases<sup>13</sup>. As cases and controls were frequency matched on week of admission, external factors such as media coverage of the influenza pandemic should not have had a differential effect on respiratory illness reporting. We chose to test both nasopharyngeal and throat swabs to increase the sensitivity of virus detection. It was perhaps unsurprising, however, that none of the nasopharyngeal and throat swabs was positive for influenza virus given a) the low rates of infection in this age-group<sup>5</sup> and b) that the majority of viral shedding in influenza occurs in the first 2-3 days after symptom onset<sup>14</sup> whereas most reported respiratory symptoms in study participants occurred 8-14 days before admission. Based on our findings it seems unlikely that any delayed cardiac effect of influenza is linked to ongoing or prolonged virus replication or shedding in the respiratory tract. Influenza serology

1  
2  
3 is difficult to interpret in vaccinated participants as it not possible to distinguish antibody rises caused by  
4 infection from those caused by vaccination. Validation of the IgA assay used suggests it has acceptable  
5 sensitivity and specificity to detect recent seasonal influenza A infection<sup>15</sup> but its effect with the  
6 pandemic strain H1N1pdm09 is unclear. It has previously been noted that serological studies carried out  
7 during the 2009 influenza pandemic were severely hampered by cross reactivity both with vaccine and  
8 with seasonal influenza strains<sup>7</sup>.

9  
10  
11  
12  
13  
14  
15  
16  
17  
18  
19  
20 Previous observational studies using large electronic primary care databases have found an association  
21 between GP consultation for acute respiratory infection in the last month and risk of acute myocardial  
22 infarction<sup>16-18</sup>. Although studies were conducted over different time periods, they encompassed the  
23 effect of varying seasonal influenza strains. Our recent self-controlled case series study using linked  
24 primary care and cardiac disease registry data from 3,927 patients also included acute respiratory  
25 infection consultations occurring during the first wave of H1N1pdm09 circulation<sup>19</sup>. We found an  
26 incidence ratio for acute myocardial infarction of 4.19 (95% confidence interval 3.18-5.53) in the first 1-3  
27 days after acute respiratory infection, with the risk falling to baseline after 28 days<sup>19</sup>. Elderly people and  
28 those consulting for an infection judged most likely to be due to influenza were at greatest risk. During  
29 the 2009 influenza pandemic people with underlying cardiovascular disease were much more likely to  
30 be hospitalised<sup>13</sup> and to die<sup>20</sup> from a range of causes attributable to pandemic influenza. Although most  
31 deaths from H1N1pdm09 occurred in younger people, this was partly a function of the age distribution  
32 of infections: in the UK the case fatality rate in the elderly was much higher than in younger age-groups<sup>5</sup>  
33 but overall numbers of deaths were small as few elderly people were infected.

34  
35  
36  
37  
38  
39  
40  
41  
42  
43  
44  
45  
46  
47  
48  
49  
50  
51  
52  
53  
54  
55  
56  
57  
58  
59  
60  
61  
62  
63  
64  
65  
66  
67  
68  
69  
70  
71  
72  
73  
74  
75  
76  
77  
78  
79  
80  
81  
82  
83  
84  
85  
86  
87  
88  
89  
90  
91  
92  
93  
94  
95  
96  
97  
98  
99  
100  
101  
102  
103  
104  
105  
106  
107  
108  
109  
110  
111  
112  
113  
114  
115  
116  
117  
118  
119  
120  
121  
122  
123  
124  
125  
126  
127  
128  
129  
130  
131  
132  
133  
134  
135  
136  
137  
138  
139  
140  
141  
142  
143  
144  
145  
146  
147  
148  
149  
150  
151  
152  
153  
154  
155  
156  
157  
158  
159  
160  
161  
162  
163  
164  
165  
166  
167  
168  
169  
170  
171  
172  
173  
174  
175  
176  
177  
178  
179  
180  
181  
182  
183  
184  
185  
186  
187  
188  
189  
190  
191  
192  
193  
194  
195  
196  
197  
198  
199  
200  
201  
202  
203  
204  
205  
206  
207  
208  
209  
210  
211  
212  
213  
214  
215  
216  
217  
218  
219  
220  
221  
222  
223  
224  
225  
226  
227  
228  
229  
230  
231  
232  
233  
234  
235  
236  
237  
238  
239  
240  
241  
242  
243  
244  
245  
246  
247  
248  
249  
250  
251  
252  
253  
254  
255  
256  
257  
258  
259  
260  
261  
262  
263  
264  
265  
266  
267  
268  
269  
270  
271  
272  
273  
274  
275  
276  
277  
278  
279  
280  
281  
282  
283  
284  
285  
286  
287  
288  
289  
290  
291  
292  
293  
294  
295  
296  
297  
298  
299  
300  
301  
302  
303  
304  
305  
306  
307  
308  
309  
310  
311  
312  
313  
314  
315  
316  
317  
318  
319  
320  
321  
322  
323  
324  
325  
326  
327  
328  
329  
330  
331  
332  
333  
334  
335  
336  
337  
338  
339  
340  
341  
342  
343  
344  
345  
346  
347  
348  
349  
350  
351  
352  
353  
354  
355  
356  
357  
358  
359  
360  
361  
362  
363  
364  
365  
366  
367  
368  
369  
370  
371  
372  
373  
374  
375  
376  
377  
378  
379  
380  
381  
382  
383  
384  
385  
386  
387  
388  
389  
390  
391  
392  
393  
394  
395  
396  
397  
398  
399  
400  
401  
402  
403  
404  
405  
406  
407  
408  
409  
410  
411  
412  
413  
414  
415  
416  
417  
418  
419  
420  
421  
422  
423  
424  
425  
426  
427  
428  
429  
430  
431  
432  
433  
434  
435  
436  
437  
438  
439  
440  
441  
442  
443  
444  
445  
446  
447  
448  
449  
450  
451  
452  
453  
454  
455  
456  
457  
458  
459  
460  
461  
462  
463  
464  
465  
466  
467  
468  
469  
470  
471  
472  
473  
474  
475  
476  
477  
478  
479  
480  
481  
482  
483  
484  
485  
486  
487  
488  
489  
490  
491  
492  
493  
494  
495  
496  
497  
498  
499  
500  
501  
502  
503  
504  
505  
506  
507  
508  
509  
510  
511  
512  
513  
514  
515  
516  
517  
518  
519  
520  
521  
522  
523  
524  
525  
526  
527  
528  
529  
530  
531  
532  
533  
534  
535  
536  
537  
538  
539  
540  
541  
542  
543  
544  
545  
546  
547  
548  
549  
550  
551  
552  
553  
554  
555  
556  
557  
558  
559  
560  
561  
562  
563  
564  
565  
566  
567  
568  
569  
570  
571  
572  
573  
574  
575  
576  
577  
578  
579  
580  
581  
582  
583  
584  
585  
586  
587  
588  
589  
590  
591  
592  
593  
594  
595  
596  
597  
598  
599  
600  
601  
602  
603  
604  
605  
606  
607  
608  
609  
610  
611  
612  
613  
614  
615  
616  
617  
618  
619  
620  
621  
622  
623  
624  
625  
626  
627  
628  
629  
630  
631  
632  
633  
634  
635  
636  
637  
638  
639  
640  
641  
642  
643  
644  
645  
646  
647  
648  
649  
650  
651  
652  
653  
654  
655  
656  
657  
658  
659  
660  
661  
662  
663  
664  
665  
666  
667  
668  
669  
670  
671  
672  
673  
674  
675  
676  
677  
678  
679  
680  
681  
682  
683  
684  
685  
686  
687  
688  
689  
690  
691  
692  
693  
694  
695  
696  
697  
698  
699  
700  
701  
702  
703  
704  
705  
706  
707  
708  
709  
710  
711  
712  
713  
714  
715  
716  
717  
718  
719  
720  
721  
722  
723  
724  
725  
726  
727  
728  
729  
730  
731  
732  
733  
734  
735  
736  
737  
738  
739  
740  
741  
742  
743  
744  
745  
746  
747  
748  
749  
750  
751  
752  
753  
754  
755  
756  
757  
758  
759  
760  
761  
762  
763  
764  
765  
766  
767  
768  
769  
770  
771  
772  
773  
774  
775  
776  
777  
778  
779  
780  
781  
782  
783  
784  
785  
786  
787  
788  
789  
790  
791  
792  
793  
794  
795  
796  
797  
798  
799  
800  
801  
802  
803  
804  
805  
806  
807  
808  
809  
810  
811  
812  
813  
814  
815  
816  
817  
818  
819  
820  
821  
822  
823  
824  
825  
826  
827  
828  
829  
830  
831  
832  
833  
834  
835  
836  
837  
838  
839  
840  
841  
842  
843  
844  
845  
846  
847  
848  
849  
850  
851  
852  
853  
854  
855  
856  
857  
858  
859  
860  
861  
862  
863  
864  
865  
866  
867  
868  
869  
870  
871  
872  
873  
874  
875  
876  
877  
878  
879  
880  
881  
882  
883  
884  
885  
886  
887  
888  
889  
890  
891  
892  
893  
894  
895  
896  
897  
898  
899  
900  
901  
902  
903  
904  
905  
906  
907  
908  
909  
910  
911  
912  
913  
914  
915  
916  
917  
918  
919  
920  
921  
922  
923  
924  
925  
926  
927  
928  
929  
930  
931  
932  
933  
934  
935  
936  
937  
938  
939  
940  
941  
942  
943  
944  
945  
946  
947  
948  
949  
950  
951  
952  
953  
954  
955  
956  
957  
958  
959  
960  
961  
962  
963  
964  
965  
966  
967  
968  
969  
970  
971  
972  
973  
974  
975  
976  
977  
978  
979  
980  
981  
982  
983  
984  
985  
986  
987  
988  
989  
990  
991  
992  
993  
994  
995  
996  
997  
998  
999  
1000

Various biological mechanisms are proposed to underlie a relationship between influenza or acute  
respiratory infection and myocardial infarction<sup>21</sup>. Acute respiratory infections may result in a host of

1  
2  
3 acute inflammatory and haemostatic effects leading to systemic inflammation, altered plasma viscosity,  
4  
5 coagulability and haemodynamic changes<sup>22</sup> as well as promoting local endothelial dysfunction, coronary  
6  
7 inflammation and plaque rupture<sup>23</sup>. Immobility associated with bed-rest and dehydration might  
8  
9 potentiate these processes.  
10  
11

12  
13  
14  
15 In conclusion, this study suggests that recent ILI occurring during the 2009 influenza pandemic was more  
16  
17 common in AMI patients, so indirectly supports the hypothesis that, as with other influenza strains,  
18  
19 H1N1pdm09 could potentially trigger AMI in vulnerable groups. The population impact of H1N1pdm09  
20  
21 on rates of hospitalisations and deaths from myocardial infarction, however, is likely to have been  
22  
23 relatively low given the mismatch between the ages of those typically affected by H1N1pdm09 and  
24  
25 acute coronary events as well as the relatively mild clinical effects of this influenza strain.  
26  
27  
28  
29

### 30 31 **Acknowledgments**

32  
33  
34 We thank all patients who agreed to participate in this study and nurses on the cardiology and surgical  
35  
36 wards at the Royal Free Hospital who helped to identify potential participants. We acknowledge Mauli  
37  
38 Patel at the Royal Free Virology Laboratory who kindly processed, stored and tested samples.  
39  
40

### 41 42 **Contributors**

43  
44  
45 CWG conceived and designed the study, recruited participants, collected and analysed data and wrote  
46  
47 the manuscript. AMG, GH, RDR, LS and ACH assisted with study design. AMG provided laboratory  
48  
49 resources. CWG, AMG, RDR, LS and ACH interpreted results. AMG, GH, RDR, LS and ACH critically  
50  
51 revised the manuscript for intellectual content. LS and ACH provided supervision. All authors approved  
52  
53 the final version of the manuscript.  
54  
55  
56  
57  
58  
59  
60

### Funding statement

This work was funded by a Medical Research Council Clinical Research Training Fellowship for CWG, grant number G0800689. LS is supported by a Wellcome Trust Senior Research Fellowship in Clinical Science, grant number 098504/Z/12/Z.

### Competing interests statement

None declared

### Data sharing statement

No additional data are available

### References

1. Cox NJ, Subbarao K (1999) Influenza. *The Lancet* 354: 1277–1282.
2. Warren-Gash C, Smeeth L, Hayward AC (2009) Influenza as a trigger for acute myocardial infarction or death from cardiovascular disease: a systematic review. *The Lancet Infectious Diseases* 9: 601–610.
3. Swine influenza A (H1N1) infection in two children – Southern California, March–April 2009 (2009). *MMWR Morb Mortal Wkly Rep* 58: 400–402.
4. Outbreak of swine-origin influenza A (H1N1) virus infection – Mexico, March–April 2009 (2009). *MMWR Morb Mortal Wkly Rep* 58: 467–470.
5. Health Protection Agency (2010) Epidemiological report of pandemic (H1N1) 2009 in the United Kingdom: April 2009 - May 2010.
6. McLean E, Pebody RG, Campbell C, Chamberland M, Hawkins C, et al. (2010) Pandemic (H1N1) 2009 influenza in the UK: clinical and epidemiological findings from the first few hundred (FF100) cases. *Epidemiol Infect* 138: 1531–1541.
7. Lagacé-Wiens PRS, Rubinstein E, Gumel A (2010) Influenza epidemiology – past, present, and future. *Crit Care Med* 38: e1–e9.
8. Chacko B, Peter JV, Pichamuthu K, Ramakrishna K, Moorthy M, et al. (2012) Cardiac manifestations in patients with pandemic (H1N1) 2009 virus infection needing intensive care. *J Crit Care* 27: 106.e1–6.
9. Davoudi AR, Maleki AR, Beykmohammadi AR, Tayebi A (2012) Fulminant myopericarditis in an immunocompetent adult due to pandemic 2009 (H1N1) influenza A virus infection. *Scand J Infect Dis* 44: 470–472.
10. Lee N, Chan PKS, Lui GCY, Wong BCK, Sin WWY, et al. (2011) Complications and Outcomes of Pandemic 2009 Influenza A (H1N1) Virus Infection in Hospitalized Adults: How Do They Differ From Those in Seasonal Influenza? *J Infect Dis* 203: 1739–1747.
11. Dawood FS, Iuliano AD, Reed C, Meltzer MI, Shay DK, et al. (2012) Estimated global mortality associated with the first 12 months of 2009 pandemic influenza A H1N1 virus circulation: a modelling study. *The Lancet Infectious Diseases* 12: 687–695.

12. Khanom AB, Velvin C, Hawrami K, Schutten M, Patel M, et al. (2011) Performance of a nurse-led paediatric point of care service for respiratory syncytial virus testing in secondary care. *J Infect* 62: 52–58.
13. Campbell CNJ, Mytton OT, McLean EM, Rutter PD, Pebody RG, et al. (2010) Hospitalization in two waves of pandemic influenza A(H1N1) in England. *Epidemiology & Infection* 139: 1560–1569.
14. Lau LLH, Cowling BJ, Fang VJ, Chan K-H, Lau EHY, et al. (2010) Viral shedding and clinical illness in naturally acquired influenza virus infections. *J Infect Dis* 201: 1509–1516.
15. Rothbarth PH, Groen J, Bohnen AM, De Groot R, Osterhaus AD (1999) Influenza virus serology – a comparative study. *J Virol Methods* 78: 163–169.
16. Smeeth L, Thomas SL, Hall AJ, Hubbard R, Farrington P, et al. (2004) Risk of myocardial infarction and stroke after acute infection or vaccination. *New England Journal of Medicine* 351: 2611–2618.
17. Clayton TC, Thompson M, Meade TW (2008) Recent respiratory infection and risk of cardiovascular disease: case-control study through a general practice database. *Eur Heart J* 29: 96–103.
18. Meier CR, Jick SS, Derby LE, Vasilakis C, Jick H, et al. (1998) Acute respiratory-tract infections and risk of first-time acute myocardial infarction. *The Lancet* 351: 1467–1471.
19. Warren-Gash C, Hayward AC, Hemingway H, Denaxas S, Thomas SL, et al. (2012) Influenza infection and risk of acute myocardial infarction in England and Wales: a CALIBER self-controlled case series study. *J Infect Dis* 206: 1652–1659.
20. Mytton OT, Rutter PD, Mak M, Stanton E, Sachedina N, et al. (2012) Mortality due to pandemic (H1N1) 2009 influenza in England: a comparison of the first and second waves. *Epidemiology & Infection* 140: 1533–1541.
21. Bazaz R, Marriott HM, Francis SE, Dockrell DH (2013) Mechanistic links between acute respiratory tract infections and acute coronary syndromes. *J Infect* 66: 1-17.
22. Harskamp RE, Van Ginkel MW (2008) Acute respiratory tract infections: a potential trigger for the acute coronary syndrome. *Annals of Medicine* 40: 121–128.
23. Vallance P, Collier J, Bhagat K (1997) Infection, inflammation, and infarction: does acute endothelial dysfunction provide a link? *The Lancet* 349: 1391–1392.

## Figure legends

**Figure 1** Number of study participants admitted by influenza surveillance week compared to weekly ILI rates per 100,000 based on national RCGP surveillance data

**Figure 2** Percentage of cases (n=70) and controls (n=64) reporting various symptoms during respiratory illness

1  
2  
3  
4  
5  
6 **Tables**  
7  
8  
9  
10  
11  
12  
13  
14  
15  
16  
17  
18  
19  
20  
21  
22  
23  
24  
25  
26  
27  
28  
29  
30  
31  
32  
33  
34  
35  
36  
37  
38  
39  
40  
41  
42  
43  
44  
45  
46  
47  
48  
49  
50  
51  
52  
53  
54  
55  
56  
57  
58  
59  
60

For peer review only

| Characteristic                            | Category               | Cases (n=70) | Controls (n=64) | P value |
|-------------------------------------------|------------------------|--------------|-----------------|---------|
| Age group                                 | 40-49                  | 8 (11.4)     | 13 (20.3)       | 0.61    |
|                                           | 50-59                  | 19 (27.1)    | 18 (28.1)       |         |
|                                           | 60-69                  | 19 (27.1)    | 15 (23.4)       |         |
|                                           | 70-79                  | 17 (24.3)    | 11 (17.2)       |         |
|                                           | 80+                    | 7 (10.0)     | 7 (10.9)        |         |
| Gender                                    | Female                 | 13 (18.6)    | 15 (23.4)       | 0.49    |
|                                           | Male                   | 57 (81.4)    | 49 (76.6)       |         |
| Admission month                           | September              | 8 (11.4)     | 7 (10.9)        | 0.92    |
|                                           | October                | 12 (17.1)    | 15 (23.4)       |         |
|                                           | November               | 15 (21.4)    | 14 (21.9)       |         |
|                                           | December               | 10 (14.3)    | 10 (15.6)       |         |
|                                           | January                | 14 (20.0)    | 11 (17.2)       |         |
|                                           | February               | 11 (15.7)    | 7 (10.9)        |         |
| Ethnicity                                 | Asian or Asian British | 18 (25.7)    | 6 (9.4)         | 0.03    |
|                                           | Black or Black British | 2 (2.9)      | 0 (0.0)         |         |
|                                           | Mixed                  | 0 (0.0)      | 1 (1.6)         |         |
|                                           | White                  | 50 (71.4)    | 57 (89.1)       |         |
| Smoker                                    | No never               | 22 (31.4)    | 23 (35.9)       | 0.77    |
|                                           | Yes current            | 27 (38.6)    | 21 (32.8)       |         |
|                                           | Yes ex                 | 21 (30.0)    | 20 (31.3)       |         |
| Diabetes                                  | No                     | 56 (80.0)    | 52 (81.3)       | 0.86    |
|                                           | Yes                    | 14 (20.0)    | 12 (18.8)       |         |
| Hypertension                              | No                     | 33 (47.1)    | 38 (59.4)       | 0.16    |
|                                           | Yes                    | 37 (52.9)    | 26 (40.6)       |         |
| Hypercholesterolaemia                     | No                     | 36 (51.4)    | 36 (56.3)       | 0.58    |
|                                           | Yes                    | 34 (48.6)    | 28 (43.8)       |         |
| Personal history of AMI                   | No                     | 56 (80.0)    | 59 (92.2)       | 0.04    |
|                                           | Yes                    | 14 (20.0)    | 5 (7.8)         |         |
| Personal history of stroke                | No                     | 69 (98.6)    | 60 (93.8)       | 0.14    |
|                                           | Yes                    | 1 (1.4)      | 4 (6.3)         |         |
| Family history of AMI                     | No                     | 27 (38.6)    | 45 (70.3)       | <0.001  |
|                                           | Yes                    | 43 (61.4)    | 19 (29.7)       |         |
| Family history of stroke                  | No                     | 65 (92.9)    | 58 (90.6)       | 0.64    |
|                                           | Yes                    | 5 (7.1)      | 6 (9.4)         |         |
| BMI category                              | 18.5-24.9              | 20 (30.8)    | 23 (39.0)       | 0.41    |
|                                           | 25.0-29.9              | 36 (55.4)    | 24 (40.7)       |         |
|                                           | 30.0-39.9              | 8 (12.3)     | 10 (17.0)       |         |
|                                           | 40.0-max               | 1 (1.5)      | 2 (3.4)         |         |
| Influenza vaccination status <sup>†</sup> | Vaccinated             | 30 (42.9)    | 29 (45.3)       | 0.78    |
|                                           | Unvaccinated           | 40 (57.1)    | 35 (54.7)       |         |

**Table 1** Characteristics of study participants (n=134)

<sup>†</sup>'Vaccinated' refers to receiving influenza vaccination in the current vaccination year (ie since September 2009). All other years were classed as 'unvaccinated' as the H1N1pdm09 strain was not represented in the vaccine



| Exposure variable                          | Prevalence – cases, n(%) | Prevalence – controls, n(%) | Unadjusted odds ratio (95% CI) | Adjusted odds ratio* (95% CI) |
|--------------------------------------------|--------------------------|-----------------------------|--------------------------------|-------------------------------|
| 1. Respiratory illness                     | 17 (24.3)                | 12 (18.8)                   | 1.39 (0.60-3.19)               | 1.39 (0.56-3.47)              |
| 2. Influenza-like illness                  | 10 (14.3)                | 3 (4.7)                     | 3.39 (0.89-12.92)              | 3.17 (0.61-16.47)             |
| 3. Fever                                   | 11 (15.7)                | 4 (6.3)                     | 2.80 (0.84-9.28)               | 2.42 (0.54-10.98)             |
| 4. Cough                                   | 21 (30.0)                | 10 (15.6)                   | 2.31 (0.99-5.40)               | 2.04 (0.76-5.47)              |
| 5. Sore throat                             | 10 (14.3)                | 8 (12.5)                    | 1.17 (0.43-3.17)               | 1.43 (0.44-4.69)              |
| 6. Influenza A IgA antibodies <sup>‡</sup> | 25 (46.3)                | 28 (54.9)                   | 0.71 (0.33-1.53)               | 0.82 (0.34-2.00)              |

**Table 2** Odds ratios for the association between acute myocardial infarction and various respiratory illness exposure variables, unadjusted and adjusted

\* Adjustments were made for age-group, gender, month of admission and influenza vaccination status (all exposures), family history of myocardial infarction (exposures 2, 3, 4 & 5) and personal history of myocardial infarction (exposures 2, 3, 4 & 5)

<sup>‡</sup>Note that n=105 (54 cases and 51 controls) for influenza antibodies where 8 equivocal results were excluded, compared to n=134 (70 cases and 64 controls) for all other exposures.

1  
2  
3  
4  
5  
6  
7  
8  
9  
10  
11  
12  
13  
14  
15  
16  
17  
18  
19  
20  
21  
22  
23  
24  
25  
26  
27  
28  
29  
30  
31  
32  
33  
34  
35  
36  
37  
38  
39  
40  
41  
42  
43  
44  
45  
46  
47  
48  
49  
50  
51  
52  
53  
54  
55  
56  
57  
58  
59  
60

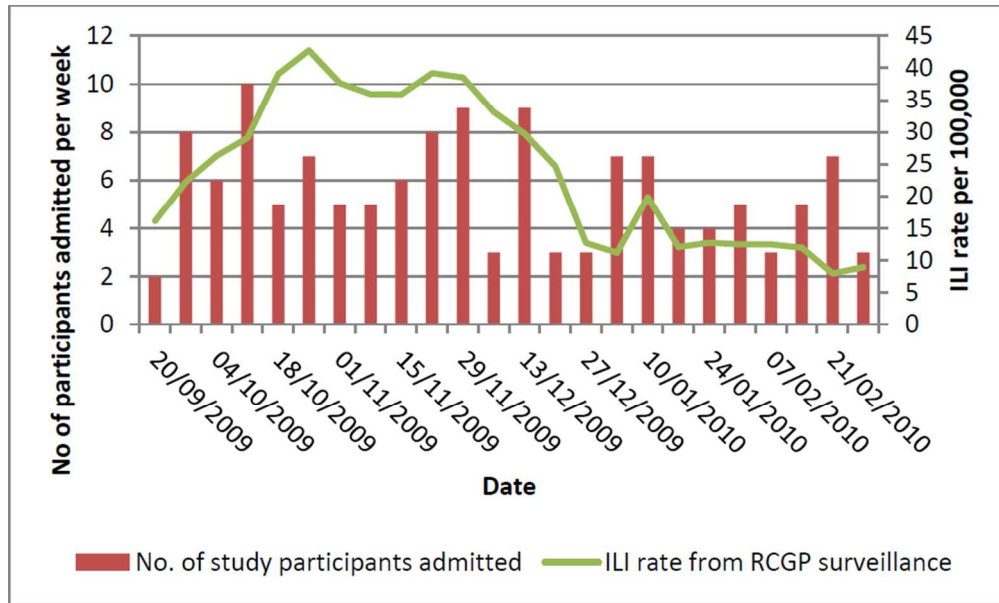

Number of study participants admitted by influenza surveillance week compared to weekly ILI rates per 100,000 based on national RCGP surveillance data  
264x158mm (96 x 96 DPI)

review only

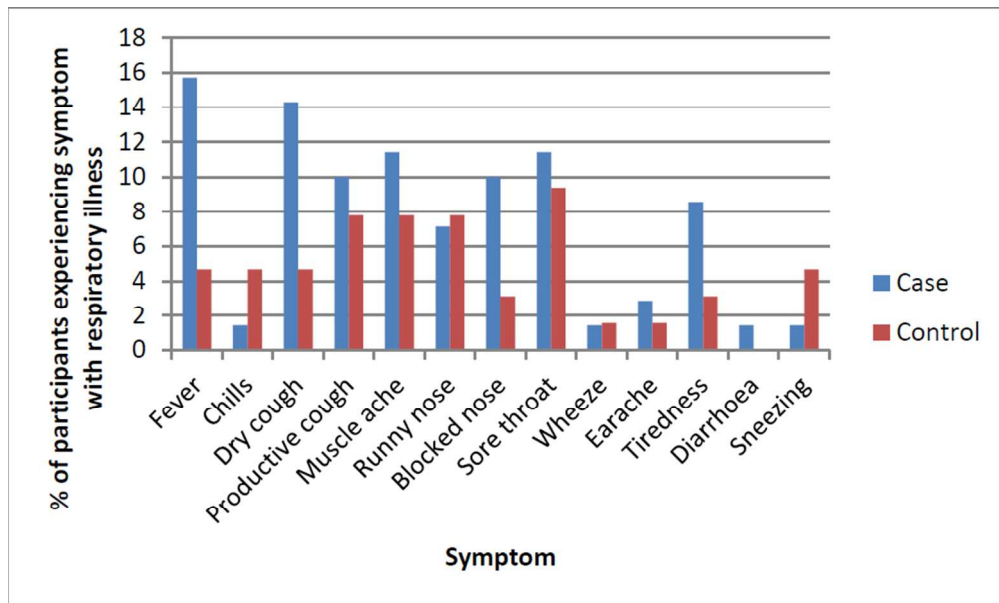

Percentage of cases (n=70) and controls (n=64) reporting various symptoms during respiratory illness  
264x158mm (96 x 96 DPI)

Review only

STROBE Statement—Checklist of items that should be included in reports of *case-control studies*

|                          | Item No | Recommendation                                                                                                                                                                       | Reported on page no.                                                                                  |
|--------------------------|---------|--------------------------------------------------------------------------------------------------------------------------------------------------------------------------------------|-------------------------------------------------------------------------------------------------------|
| Title and abstract       | 1       | (a) Indicate the study's design with a commonly used term in the title or the abstract                                                                                               | 1                                                                                                     |
|                          |         | (b) Provide in the abstract an informative and balanced summary of what was done and what was found                                                                                  | 2                                                                                                     |
| <b>Introduction</b>      |         |                                                                                                                                                                                      |                                                                                                       |
| Background/rationale     | 2       | Explain the scientific background and rationale for the investigation being reported                                                                                                 | 4                                                                                                     |
| Objectives               | 3       | State specific objectives, including any prespecified hypotheses                                                                                                                     | 5                                                                                                     |
| <b>Methods</b>           |         |                                                                                                                                                                                      |                                                                                                       |
| Study design             | 4       | Present key elements of study design early in the paper                                                                                                                              | 5                                                                                                     |
| Setting                  | 5       | Describe the setting, locations, and relevant dates, including periods of recruitment, exposure, follow-up, and data collection                                                      | 5-6                                                                                                   |
| Participants             | 6       | (a) Give the eligibility criteria, and the sources and methods of case ascertainment and control selection. Give the rationale for the choice of cases and controls                  | 5                                                                                                     |
|                          |         | (b) For matched studies, give matching criteria and the number of controls per case                                                                                                  | Frequency matching criteria given on p5                                                               |
| Variables                | 7       | Clearly define all outcomes, exposures, predictors, potential confounders, and effect modifiers. Give diagnostic criteria, if applicable                                             | 5-7                                                                                                   |
| Data sources/measurement | 8*      | For each variable of interest, give sources of data and details of methods of assessment (measurement). Describe comparability of assessment methods if there is more than one group | 6                                                                                                     |
| Bias                     | 9       | Describe any efforts to address potential sources of bias                                                                                                                            | 6                                                                                                     |
| Study size               | 10      | Explain how the study size was arrived at                                                                                                                                            | Study size based on numbers of eligible patients hospitalised during the influenza circulation period |
| Quantitative variables   | 11      | Explain how quantitative variables were handled in the analyses. If applicable, describe which groupings were chosen and why                                                         | 6                                                                                                     |
| Statistical methods      | 12      | (a) Describe all statistical methods, including those used to control for confounding                                                                                                | 6-7                                                                                                   |
|                          |         | (b) Describe any methods used to examine subgroups and interactions                                                                                                                  | N/A                                                                                                   |
|                          |         | (c) Explain how missing data were addressed                                                                                                                                          | 6                                                                                                     |
|                          |         | (d) If applicable, explain how matching of cases and controls was addressed                                                                                                          | N/A                                                                                                   |

|                  |     |                                                                                                                                                                                                              |                                                                                                                              |
|------------------|-----|--------------------------------------------------------------------------------------------------------------------------------------------------------------------------------------------------------------|------------------------------------------------------------------------------------------------------------------------------|
|                  |     | (e) Describe any sensitivity analyses                                                                                                                                                                        | N/A                                                                                                                          |
| <b>Results</b>   |     |                                                                                                                                                                                                              |                                                                                                                              |
| Participants     | 13* | (a) Report numbers of individuals at each stage of study—eg numbers potentially eligible, examined for eligibility, confirmed eligible, included in the study, completing follow-up, and analysed            | 7                                                                                                                            |
|                  |     | (b) Give reasons for non-participation at each stage                                                                                                                                                         | Data not systematically collected but reasons for non-participation include lack of time and feeling unwell during admission |
|                  |     | (c) Consider use of a flow diagram                                                                                                                                                                           | Not done as no follow up with this study design. Fig 1 shows recruitment over time.                                          |
| Descriptive data | 14* | (a) Give characteristics of study participants (eg demographic, clinical, social) and information on exposures and potential confounders                                                                     | Table 1                                                                                                                      |
|                  |     | (b) Indicate number of participants with missing data for each variable of interest                                                                                                                          | Table 1 and p8                                                                                                               |
| Outcome data     | 15* | Report numbers in each exposure category, or summary measures of exposure                                                                                                                                    | 8                                                                                                                            |
| Main results     | 16  | (a) Give unadjusted estimates and, if applicable, confounder-adjusted estimates and their precision (eg, 95% confidence interval). Make clear which confounders were adjusted for and why they were included | Table 2                                                                                                                      |
|                  |     | (b) Report category boundaries when continuous variables were categorized                                                                                                                                    | 6                                                                                                                            |
|                  |     | (c) If relevant, consider translating estimates of relative risk into absolute risk for a meaningful time period                                                                                             | N/A                                                                                                                          |

|                          |    |                                                                                                                                                                            |      |
|--------------------------|----|----------------------------------------------------------------------------------------------------------------------------------------------------------------------------|------|
| Other analyses           | 17 | Report other analyses done—eg analyses of subgroups and interactions, and sensitivity analyses                                                                             | N/A  |
| <b>Discussion</b>        |    |                                                                                                                                                                            |      |
| Key results              | 18 | Summarise key results with reference to study objectives                                                                                                                   | 9    |
| Limitations              | 19 | Discuss limitations of the study, taking into account sources of potential bias or imprecision. Discuss both direction and magnitude of any potential bias                 | 9-10 |
| Interpretation           | 20 | Give a cautious overall interpretation of results considering objectives, limitations, multiplicity of analyses, results from similar studies, and other relevant evidence | 11   |
| Generalisability         | 21 | Discuss the generalisability (external validity) of the study results                                                                                                      | 11   |
| <b>Other information</b> |    |                                                                                                                                                                            |      |
| Funding                  | 22 | Give the source of funding and the role of the funders for the present study and, if applicable, for the original study on which the present article is based              | 12   |

\*Give information separately for cases and controls.

**Note:** An Explanation and Elaboration article discusses each checklist item and gives methodological background and published examples of transparent reporting. The STROBE checklist is best used in conjunction with this article (freely available on the Web sites of PLoS Medicine at <http://www.plosmedicine.org/>, Annals of Internal Medicine at <http://www.annals.org/>, and Epidemiology at <http://www.epidem.com/>). Information on the STROBE Initiative is available at <http://www.strobe-statement.org>.



**Influenza-like illness in acute myocardial infarction patients during the winter wave of the influenza A H1N1 pandemic in London: a case control study**

|                                 |                                                                                                                                                                                                                                                                                                                                                                                                                                                                                                                                      |
|---------------------------------|--------------------------------------------------------------------------------------------------------------------------------------------------------------------------------------------------------------------------------------------------------------------------------------------------------------------------------------------------------------------------------------------------------------------------------------------------------------------------------------------------------------------------------------|
| Journal:                        | <i>BMJ Open</i>                                                                                                                                                                                                                                                                                                                                                                                                                                                                                                                      |
| Manuscript ID:                  | bmjopen-2013-002604.R1                                                                                                                                                                                                                                                                                                                                                                                                                                                                                                               |
| Article Type:                   | Research                                                                                                                                                                                                                                                                                                                                                                                                                                                                                                                             |
| Date Submitted by the Author:   | 07-Mar-2013                                                                                                                                                                                                                                                                                                                                                                                                                                                                                                                          |
| Complete List of Authors:       | Warren-Gash, Charlotte; UCL, Research Department of Infection & Population Health<br>Geretti, Anna Maria; University of Liverpool, Institute of Infection and Global Health<br>Hamilton, George; Royal Free London Foundation Trust, Department of Vascular Surgery<br>Rakhit, Roby; Royal Free London Foundation Trust, Department of Cardiology<br>Smeeth, Liam; London School of Hygiene and Tropical Medicine, Epidemiology and Population Health<br>Hayward, Andrew; University College London, Infection and Population Health |
| <b>Primary Subject Heading</b>: | Epidemiology                                                                                                                                                                                                                                                                                                                                                                                                                                                                                                                         |
| Secondary Subject Heading:      | Infectious diseases, Cardiovascular medicine                                                                                                                                                                                                                                                                                                                                                                                                                                                                                         |
| Keywords:                       | Myocardial infarction < CARDIOLOGY, Epidemiology < INFECTIOUS DISEASES, PUBLIC HEALTH                                                                                                                                                                                                                                                                                                                                                                                                                                                |
|                                 |                                                                                                                                                                                                                                                                                                                                                                                                                                                                                                                                      |

SCHOLARONE™  
Manuscripts

1  
2  
3 **Title** Influenza-like illness in acute myocardial infarction patients during the winter wave of the influenza  
4  
5 A H1N1 pandemic in London: a case control study  
6  
7

8  
9 **Authors** Charlotte Warren-Gash<sup>1</sup>, Anna Maria Geretti<sup>2</sup>, George Hamilton<sup>3</sup>, Roby D. Rakhit<sup>4</sup>, Liam  
10  
11 Smeeth<sup>5</sup>, Andrew C. Hayward<sup>1</sup>  
12  
13

14  
15 **Affiliations**

16  
17 <sup>1</sup>Centre for Infectious Disease Epidemiology, Research Department of Infection & Population Health,  
18  
19 UCL, London, UK  
20  
21

22 <sup>2</sup> Institute of Infection and Global Health, University of Liverpool, UK  
23

24 <sup>3</sup> Department of Vascular Surgery, Royal Free London Foundation Trust, London, UK  
25

26 <sup>4</sup> Department of Cardiology, Royal Free London Foundation Trust, London, UK  
27

28 <sup>5</sup> Department of Non-Communicable Disease Epidemiology, London School of Hygiene & Tropical  
29  
30 Medicine, London, UK  
31  
32

33  
34  
35 **Corresponding author**

36  
37 Dr Charlotte Warren-Gash

38  
39 Research Department of Infection & Population Health

40  
41  
42 1<sup>st</sup> Floor, Royal Free Hospital

43  
44 Rowland Hill Street

45  
46 London NW3 2PF

47  
48 Email: [c.warren-gash@ucl.ac.uk](mailto:c.warren-gash@ucl.ac.uk) / [charlotte.warren-gash@doctors.org.uk](mailto:charlotte.warren-gash@doctors.org.uk)  
49  
50

51  
52  
53 Tel: 020 7794 0500 x36720 Fax: 020 7794 1224  
54

55  
56 **Word Count** Abstract 296, main text 2389 (excluding article summary, tables, figures, legends and refs)  
57  
58  
59  
60



**ABSTRACT**

**Objective:** To investigate recent respiratory and influenza-like illnesses in acute myocardial infarction patients compared to patients hospitalised for acute non vascular surgical conditions during the second wave of the 2009 influenza A H1N1 pandemic

**Design:** Case control study

**Setting:** Coronary care unit, acute cardiology and acute surgical admissions wards in a major teaching hospital in London, UK

**Participants:** 134 participants (70 cases and 64 controls) aged  $\geq 40$  years hospitalised for acute myocardial infarction and acute surgical conditions between 21/09/2009 and 28/02/2010, frequency-matched for gender, 5-year age-band and admission week

**Primary exposure:** Influenza-like illness (ILI - defined as feeling feverish with either cough or sore throat) within the last month. **Secondary exposures:** Acute respiratory illness within the last month not meeting ILI criteria; nasopharyngeal and throat swab positive for influenza virus

**Results:** 29 participants of 134 (21.6%) reported respiratory illness within the last month, of whom 13 (9.7%) had illnesses meeting ILI criteria. The most frequently reported category for timing of respiratory symptom onset was 8-14 days before admission (31.0% of illnesses). Cases were more likely than controls to report ILI – adjusted OR 3.17 (95% confidence interval 0.61-16.47) – as well as other key respiratory symptoms, and were less likely to have received influenza vaccination – adjusted OR 0.46 (95% CI, 0.19-1.12) – although differences were not statistically significant. No swabs were positive for influenza virus.

**Conclusions:** Point estimates suggested that recent ILI was more common in patients hospitalised with acute myocardial infarction than with acute surgical conditions during the second wave of the influenza A H1N1 pandemic, and influenza vaccination was associated with cardio-protection, although findings were not statistically significant. The study was underpowered, partly because the age groups typically

1  
2  
3 affected by acute myocardial infarction had low rates of infection with the pandemic influenza strain  
4  
5 compared to seasonal influenza.  
6  
7  
8  
9

## 10 **ARTICLE SUMMARY**

### 11 **Article focus**

- 12 • Seasonal influenza can trigger cardiovascular complications but the cardiac effects of the 2009  
13 influenza pandemic are less clear.
- 14 • We aimed to investigate recent influenza-like illness in patients hospitalised with acute  
15 myocardial infarction and surgical conditions during the 2009 influenza pandemic in London.  
16  
17  
18  
19  
20  
21  
22  
23

### 24 **Key messages**

- 25 • 14.3% of patients hospitalised with acute myocardial infarction (cases) reported recent  
26 influenza-like illness compared to 4.7% of patients hospitalised for acute surgical conditions  
27 (controls)
- 28 • Cases were more likely than controls to report a range of recent respiratory symptoms and less  
29 likely to have received influenza vaccination though differences were not statistically significant  
30  
31  
32
- 33 • The median age of cases with acute myocardial infarction was 63.6 years, whereas the majority  
34 of people infected with pandemic influenza strain nationally were young  
35  
36  
37  
38  
39  
40  
41  
42

### 43 **Strengths and limitations**

- 44 • The study was underpowered to detect an effect, partly due to low infection rates with the  
45 pandemic influenza virus in age-groups typically affected by acute myocardial infarction, but it  
46 will inform design of future similar studies  
47  
48  
49  
50  
51  
52  
53  
54  
55  
56  
57  
58  
59  
60

## INTRODUCTION

Seasonal influenza can trigger cardiovascular complications and deaths in vulnerable populations, especially the elderly and those with underlying medical conditions<sup>1</sup>. Evidence to support the hypothesis that seasonal influenza may trigger acute myocardial infarction comes from a range of observational studies incorporating the effects of different circulating influenza strains and subtypes<sup>2</sup>. In a pandemic situation, however, when there is global spread of a novel influenza strain, clinical and demographic profiles of those affected may change dramatically.

The most recent influenza pandemic was caused by an influenza A H1N1 strain (H1N1pdm09) that emerged in Mexico and the United States in April 2009<sup>3,4</sup>. The UK experienced several waves of infection with this novel strain - a first wave occurred in spring and summer 2009 followed by a second wave in the winter of 2009/10 and a post-pandemic wave in winter 2010/11<sup>5</sup>. Initial evidence from the first wave in the UK suggested that typical illnesses were mild and affected mainly children and young people<sup>6</sup>. The average age of cases increased over subsequent waves of the pandemic<sup>7</sup> but it is unclear how this affected clinical illness profiles. Vaccination coverage did not reach high levels until the post-pandemic season.

There have been reports of myocarditis, myocardial injury and left ventricular systolic dysfunction, which may be reversible, in patients with severe H1N1pdm09<sup>8,9</sup>. It has been suggested that H1N1pdm09 was associated with higher rates of extra-pulmonary complications than seasonal influenza<sup>10</sup> but this is difficult to compare as surveillance of severe influenza-related disease was greatly enhanced during the pandemic. A recent mathematical modelling study estimated that globally there were 83,300 cardiovascular deaths associated with the first twelve months of H1N1pdm09 circulation in adults aged >17 years<sup>11</sup>, but the contribution of myocardial infarction deaths to this figure is unknown.

1  
2  
3 In this study we aimed to investigate whether patients hospitalised for acute myocardial infarction  
4 during the winter wave of the influenza A H1N1 pandemic were more likely than surgical patients to  
5 have experienced recent influenza-like illness or acute respiratory illness, or to have concurrent PCR  
6 positive influenza or evidence of influenza A IgA antibodies in sera.  
7  
8  
9  
10  
11  
12

## 13 **METHODS**

### 14 **Setting, design and participants**

15  
16  
17  
18  
19  
20 This was an observational case control study carried out in hospital in-patients at the Royal Free London  
21 NHS Foundation Trust between 21<sup>st</sup> September 2009 and 28<sup>th</sup> February 2010. Cases were patients aged  
22 ≥40 years who had experienced an acute myocardial infarction (defined as a rise in troponin T with  
23 ischaemic symptoms and/or typical ECG changes, or by angiographic evidence of acute coronary artery  
24 thrombosis during primary percutaneous coronary intervention). Controls were patients aged ≥40 years  
25 admitted with an acute surgical condition such as appendicitis, bowel or urinary obstruction and no  
26 history of myocardial infarction within the past month. These patients were chosen as controls because  
27 their admissions were considered unlikely to be influenced by recent influenza-like illness. Cases and  
28 controls were frequency matched for gender, age-group in 5 year age-bands and week of admission. All  
29 were English-speaking and able to provide written informed consent. The study size was based on  
30 numbers of eligible patients hospitalised during the influenza circulation period.  
31  
32  
33  
34  
35  
36  
37  
38  
39  
40  
41  
42  
43  
44  
45

### 46 **Exposures**

47  
48  
49 The main exposure was recent influenza-like illness, defined as a history of feeling feverish with either  
50 cough or sore throat within the last month. We also used the exposure recent acute respiratory  
51 infection to capture a history of respiratory illness within the last month with any of the following  
52 symptoms – fever, chills, dry cough, productive cough, myalgia, rhinorrhoea, blocked nose, sore throat,  
53  
54  
55  
56  
57  
58  
59  
60

1  
2  
3 wheeze, earache and fatigue – that did not meet criteria for influenza-like illness. Additional exposures  
4  
5 were nasopharyngeal and throat swabs testing positive for influenza by real-time polymerase chain  
6  
7 reaction (PCR), presence of IgA antibodies to influenza A in serum samples and self-reported influenza  
8  
9 vaccination status.  
10

### 11 12 13 **Data sources and measurement**

14  
15  
16 We used a questionnaire to investigate recent respiratory and influenza-like illness as well as to capture  
17  
18 data on demographics, medical history and influenza vaccination status. Information on influenza  
19  
20 vaccination status was collected as 'vaccinated this year (from September 2009)', 'vaccinated last year  
21  
22 (September 2008 - August 2009)', 'vaccinated 2-5 years ago', 'vaccinated >5 years ago' and 'never  
23  
24 vaccinated'. Vaccination status was then re-categorised as a binary variable comprising 'vaccinated this  
25  
26 year' and 'unvaccinated', which included all other categories, to recognise that vaccinations in previous  
27  
28 seasons would not protect against the new circulating pandemic influenza strain. Medical records were  
29  
30 reviewed for details of the current admission and to confirm data on potential confounding factors.  
31  
32 Combined nasopharyngeal and throat swabs were taken from each participant, placed in viral transport  
33  
34 medium and transported to the laboratory for storage at -80°C. Samples were tested for the presence of  
35  
36 influenza virus RNA using a validated in house real-time PCR with a lower limit of detection of 1 RNA  
37  
38 copy per reaction, as previously described<sup>12</sup>. A single serum sample was taken for quantification of IgA  
39  
40 antibodies to influenza A as a marker of recent exposure (as IgA levels peak at around 2 weeks after  
41  
42 exposure and reach baseline by around 4-6 weeks). Serum samples were centrifuged, frozen at -80°C  
43  
44 and batch tested using a commercially available enzyme-linked immunosorbent assay (EIA) for influenza  
45  
46 A IgA (Biosupply UK, cat no. RE56501). Antibody concentrations were initially explored as a continuous  
47  
48 variable, then categorised into 'positive' (>12 U/ml), 'equivocal' (8-12 U/ml) and 'negative' (>8 U/ml)  
49  
50 categories based on standard laboratory thresholds. Equivocal results were dropped for analyses.  
51  
52  
53  
54  
55  
56  
57  
58  
59  
60

## Statistical methods

All analyses were carried out using Stata (*Stata Statistical Software: Release 12. College Station, TX: StataCorp LP*). Baseline comparability between cases and controls was assessed with  $X^2$  tests.

Characteristics of participants with and without missing data were also compared using  $X^2$  tests to assess any risk of bias associated with missing data. We used multivariable logistic regression analysis to investigate associations between recent influenza-like illness or acute respiratory illness exposures and case/ control status, controlling for the frequency-matching factors age-group, gender and month of admission and influenza vaccination status as an a priori confounder (all models) as well as for other potential confounding factors. An additional multivariable model in which influenza vaccination status was the main exposure was generated using the same approach. Potential confounders were examined using a backwards stepwise approach whereby factors independently associated with both exposure and outcome were included in models and likelihood ratio tests used to assess the effect of removing each one sequentially. If p values from likelihood ratio tests were  $<0.1$  then factors were retained in the model.

## RESULTS

### Characteristics of study participants

134 participants were recruited, who comprised 70 cases from 106 approached (acceptance rate 66%) and 64 controls from 95 approached (acceptance rate 67%). Reasons for non-participation included lack of time, unwillingness to experience additional procedures and feeling tired or unwell. The median age of participants was 63.6 years (IQR 53.3-72.6) and 21% were female. Cases were more likely to be of Asian or Asian British ethnicity ( $p=0.016$ ), to have a previous history of myocardial infarction ( $p=0.04$ ) or a family history of myocardial infarction ( $p<0.001$ ) than controls. Of the 70 patients hospitalised for acute myocardial infarction, 48 (68.5%) met criteria for ST-elevation myocardial infarction, 17 (24.3%)

1  
2  
3 had a non ST-elevation myocardial infarction and in 5 (7.1%) cases the subtype of myocardial infarction  
4  
5 was unspecified. Control patients were admitted with a range of acute non-vascular surgical  
6  
7 presentations that included colorectal, urological and orthopaedic conditions.  
8  
9

10  
11 **Table 1**

12  
13  
14 **Timing of participants' admissions in relation to national influenza circulation**

15  
16  
17 A comparison of study participants' dates of admission with national rates of GP consultations for  
18  
19 influenza-like illness (ILI) based on RCGP surveillance data is shown in figure 1. The peak week for ILI  
20  
21 consultations in England was week 43 (ending 25<sup>th</sup> October 2009) when the rate was 42.8 per 100,000.  
22  
23 This was also the peak week for influenza virus circulation according to data from virological sentinel  
24  
25 surveillance schemes, when the proportion of positive samples reached 41.2%. Our recruitment period  
26  
27 spanned this period of peak influenza circulation.  
28  
29

30  
31  
32 **Figure 1**

33  
34 **Recent respiratory and influenza-like illness**

35  
36  
37 17 cases (24.3%) and 12 controls (18.8%) reported respiratory illness in the month preceding hospital  
38  
39 admission. 13 illnesses – reported by 10 cases (14.3%) and 3 controls (4.7%) – met criteria for influenza-  
40  
41 like illness (defined as feeling feverish with cough and/or sore throat). The most frequently reported  
42  
43 category for the timing of respiratory symptom onset was 8-14 days before admission (31.0% of  
44  
45 illnesses). 4-7 days was the most frequently reported category for length of illness (37.9% of illnesses).  
46  
47 Symptom profiles of participants reporting recent respiratory illness are shown in figure 2. No swabs  
48  
49 tested positive for influenza virus nucleic acid. Serum samples were available on 113 of 134 participants  
50  
51 (84.3%). There were no significant differences in characteristics of participants with and without missing  
52  
53 serum samples (data not shown). 25 cases (43.1%) and 28 controls (50.9%) tested positive for serum  
54  
55  
56  
57  
58  
59  
60

1  
2  
3 influenza A IgA antibodies. 62% of participants who were seropositive had received influenza  
4  
5 vaccination during the study period compared to 31% of seronegative participants. Overall 44.0% of  
6  
7 participants were vaccinated. The proportion of participants recruited in each month who were  
8  
9 vaccinated increased from 0% in September 2009, to 29.6% in October 2009, 44.8% in November 2009,  
10  
11 55.0% in December 2009, 72.0% in January 2010 and was 50% in February 2010.  
12  
13

### 14 15 16 **Figure 2**

17  
18 Cases were more likely to have reported influenza-like illness than controls – adjusted OR 3.17 (95%  
19  
20 confidence interval 0.61-16.47) – as well as other key respiratory illness symptoms, although differences  
21  
22 were not statistically significant. Results from this logistic regression analysis are summarised in table 2.  
23  
24 There was also a trend towards a protective effect of influenza vaccination against myocardial infarction  
25  
26 – adjusted OR 0.46 (95% CI, 0.19-1.12) – after controlling for age-group, gender, month of admission and  
27  
28 personal history of AMI.  
29  
30  
31

### 32 33 **Table 2**

## 34 35 36 **DISCUSSION**

37  
38  
39 The study was supportive of the hypothesis that recent respiratory and in particular influenza-like  
40  
41 illnesses occurring during the second wave of the influenza A H1N1 pandemic were more common in  
42  
43 patients hospitalised with acute myocardial infarction than with acute surgical conditions. Influenza  
44  
45 vaccination was also associated with protection against myocardial infarction, although differences were  
46  
47 not statistically significant. While we had hypothesised that more adults would be infected during the  
48  
49 second pandemic wave due to the expected upwards shift in age distribution of infections, national  
50  
51 rates of influenza-like illness remained low<sup>5</sup>, especially in age groups typically affected by acute  
52  
53 myocardial infarction. The study was therefore underpowered to detect an effect, partly due to limited  
54  
55 numbers of infections among participants.  
56  
57  
58  
59  
60



1  
2  
3  
4  
5  
6  
7 Using self-reported recent respiratory and influenza-like illness as exposures introduced the possibility  
8  
9 of reporting or recall bias. Nonetheless this method allows greater sensitivity to detect recent  
10  
11 respiratory symptoms than relying on reports of medically attended illnesses, which comprise only a  
12  
13 small minority of influenza cases<sup>13</sup>. As cases and controls were frequency matched on week of  
14  
15 admission, external factors such as media coverage of the influenza pandemic should not have had a  
16  
17 differential effect on respiratory illness reporting. We chose to test both nasopharyngeal and throat  
18  
19 swabs to increase the sensitivity of virus detection. It was perhaps unsurprising, however, that none of  
20  
21 the nasopharyngeal and throat swabs was positive for influenza virus given a) the low rates of infection  
22  
23 in this age-group<sup>5</sup> and b) that the majority of viral shedding in influenza occurs in the first 2-3 days after  
24  
25 symptom onset<sup>14</sup> whereas most reported respiratory symptoms in study participants occurred 8-14 days  
26  
27 before admission. Based on our findings it seems unlikely that any delayed cardiac effect of influenza is  
28  
29 linked to ongoing or prolonged virus replication or shedding in the respiratory tract. Influenza serology  
30  
31 is difficult to interpret in vaccinated participants as it not possible to distinguish antibody rises caused by  
32  
33 infection from those caused by vaccination. Validation of the IgA assay used suggests it has acceptable  
34  
35 sensitivity and specificity to detect recent seasonal influenza A infection<sup>15</sup> but its effect with the  
36  
37 pandemic strain H1N1pdm09 is unclear. It has previously been noted that serological studies carried out  
38  
39 during the 2009 influenza pandemic were severely hampered by cross reactivity both with vaccine and  
40  
41 with seasonal influenza strains<sup>7</sup>.

42  
43  
44  
45  
46  
47  
48  
49  
50 Previous observational studies using large electronic primary care databases have found an association  
51  
52 between GP consultation for acute respiratory infection in the last month and risk of acute myocardial  
53  
54 infarction<sup>16-18</sup>. Although studies were conducted over different time periods, they encompassed the  
55  
56 effect of varying seasonal influenza strains. Our recent self-controlled case series study using linked  
57  
58  
59  
60

1  
2  
3 primary care and cardiac disease registry data from 3,927 patients also included acute respiratory  
4  
5 infection consultations occurring during the first wave of H1N1pdm09 circulation<sup>19</sup>. We found an  
6  
7 incidence ratio for acute myocardial infarction of 4.19 (95% confidence interval 3.18-5.53) in the first 1-3  
8  
9 days after acute respiratory infection, with the risk falling to baseline after 28 days<sup>19</sup>. Elderly people and  
10  
11 those consulting for an infection judged most likely to be due to influenza were at greatest risk. During  
12  
13 the 2009 influenza pandemic people with underlying cardiovascular disease were much more likely to  
14  
15 be hospitalised<sup>13</sup> and to die<sup>20</sup> from a range of causes attributable to pandemic influenza. Although most  
16  
17 deaths from H1N1pdm09 occurred in younger people, this was partly a function of the age distribution  
18  
19 of infections: in the UK the case fatality rate in the elderly was much higher than in younger age-groups<sup>5</sup>  
20  
21 but overall numbers of deaths were small as few elderly people were infected.  
22  
23  
24  
25  
26  
27

28 Various biological mechanisms are proposed to underlie a relationship between influenza or acute  
29  
30 respiratory infection and myocardial infarction<sup>21</sup>. Acute respiratory infections may result in a host of  
31  
32 acute inflammatory and haemostatic effects leading to systemic inflammation, altered plasma viscosity,  
33  
34 coagulability and haemodynamic changes<sup>22</sup> as well as promoting local endothelial dysfunction, coronary  
35  
36 inflammation and plaque rupture<sup>23</sup>. Immobility associated with bed-rest and dehydration might  
37  
38 potentiate these processes.  
39  
40  
41  
42  
43  
44

45 In conclusion, this study suggests that recent ILI occurring during the 2009 influenza pandemic was more  
46  
47 common in AMI patients. Taken in the context of previous work, this helps to support the hypothesis  
48  
49 that, as with other influenza strains, H1N1pdm09 could potentially trigger AMI in vulnerable groups. It  
50  
51 is likely, however, that the effect is not specific to influenza and could have also been due to other  
52  
53 viruses circulating at the time. The population impact of H1N1pdm09 on rates of hospitalisations and  
54  
55 deaths from myocardial infarction is also likely to have been relatively low given the mismatch between  
56  
57  
58  
59  
60

1  
2  
3 the ages of those typically affected by H1N1pdm09 and acute coronary events as well as the relatively  
4  
5 mild clinical effects of this influenza strain.  
6  
7  
8  
9

### 10 **Acknowledgments**

11  
12  
13 We thank all patients who agreed to participate in this study and nurses on the cardiology and surgical  
14  
15 wards at the Royal Free Hospital who helped to identify potential participants. We acknowledge Mauli  
16  
17 Patel at the Royal Free Virology Laboratory who kindly processed, stored and tested samples.  
18  
19

### 20 **Contributors**

21  
22  
23  
24 CWG conceived and designed the study, recruited participants, collected and analysed data and wrote  
25  
26 the manuscript. AMG, GH, RDR, LS and ACH assisted with study design. AMG provided laboratory  
27  
28 resources. CWG, AMG, RDR, LS and ACH interpreted results. AMG, GH, RDR, LS and ACH critically  
29  
30 revised the manuscript for intellectual content. LS and ACH provided supervision. All authors approved  
31  
32 the final version of the manuscript.  
33  
34  
35

### 36 **Funding statement**

37  
38  
39 This work was funded by a Medical Research Council Clinical Research Training Fellowship for CWG,  
40  
41 grant number G0800689. LS is supported by a Wellcome Trust Senior Research Fellowship in Clinical  
42  
43 Science, grant number 098504/Z/12/Z.  
44  
45  
46

### 47 **Competing interests statement**

48  
49  
50 None declared  
51  
52

### 53 **Data sharing statement**

54  
55  
56 No additional data are available  
57  
58  
59  
60

## References

1. Cox NJ, Subbarao K (1999) Influenza. *The Lancet* 354: 1277–1282.
2. Warren-Gash C, Smeeth L, Hayward AC (2009) Influenza as a trigger for acute myocardial infarction or death from cardiovascular disease: a systematic review. *The Lancet Infectious Diseases* 9: 601–610.
3. Swine influenza A (H1N1) infection in two children – Southern California, March–April 2009 (2009). *MMWR Morb Mortal Wkly Rep* 58: 400–402.
4. Outbreak of swine-origin influenza A (H1N1) virus infection – Mexico, March–April 2009 (2009). *MMWR Morb Mortal Wkly Rep* 58: 467–470.
5. Health Protection Agency (2010) Epidemiological report of pandemic (H1N1) 2009 in the United Kingdom: April 2009 - May 2010.
6. McLean E, Pebody RG, Campbell C, Chamberland M, Hawkins C, et al. (2010) Pandemic (H1N1) 2009 influenza in the UK: clinical and epidemiological findings from the first few hundred (FF100) cases. *Epidemiol Infect* 138: 1531–1541.
7. Lagacé-Wiens PRS, Rubinstein E, Gumel A (2010) Influenza epidemiology – past, present, and future. *Crit Care Med* 38: e1–e9.
8. Chacko B, Peter JV, Pichamuthu K, Ramakrishna K, Moorthy M, et al. (2012) Cardiac manifestations in patients with pandemic (H1N1) 2009 virus infection needing intensive care. *J Crit Care* 27: 106.e1–6.
9. Martin SS, Hollingsworth CL, Norfolk SG, Wolfe CR, Hollingsworth JW. (2010) Reversible cardiac dysfunction associated with pandemic 2009 influenza A (H1N1). *Chest* 137: 1195–7.
10. Lee N, Chan PKS, Lui GCY, Wong BCK, Sin WWY, et al. (2011) Complications and Outcomes of Pandemic 2009 Influenza A (H1N1) Virus Infection in Hospitalized Adults: How Do They Differ From Those in Seasonal Influenza? *J Infect Dis* 203: 1739–1747.
11. Dawood FS, Iuliano AD, Reed C, Meltzer MI, Shay DK, et al. (2012) Estimated global mortality associated with the first 12 months of 2009 pandemic influenza A H1N1 virus circulation: a modelling study. *The Lancet Infectious Diseases* 12: 687–695.
12. Khanom AB, Velvin C, Hawrami K, Schutten M, Patel M, et al. (2011) Performance of a nurse-led paediatric point of care service for respiratory syncytial virus testing in secondary care. *J Infect* 62: 52–58.
13. Campbell CNJ, Mytton OT, McLean EM, Rutter PD, Pebody RG, et al. (2010) Hospitalization in two waves of pandemic influenza A(H1N1) in England. *Epidemiology & Infection* 139: 1560–1569.
14. Lau LLH, Cowling BJ, Fang VJ, Chan K-H, Lau EHY, et al. (2010) Viral shedding and clinical illness in naturally acquired influenza virus infections. *J Infect Dis* 201: 1509–1516.
15. Rothbarth PH, Groen J, Bohnen AM, De Groot R, Osterhaus AD (1999) Influenza virus serology – a comparative study. *J Virol Methods* 78: 163–169.
16. Smeeth L, Thomas SL, Hall AJ, Hubbard R, Farrington P, et al. (2004) Risk of myocardial infarction and stroke after acute infection or vaccination. *New England Journal of Medicine* 351: 2611–2618.
17. Clayton TC, Thompson M, Meade TW (2008) Recent respiratory infection and risk of cardiovascular disease: case-control study through a general practice database. *Eur Heart J* 29: 96–103.
18. Meier CR, Jick SS, Derby LE, Vasilakis C, Jick H, et al. (1998) Acute respiratory-tract infections and risk of first-time acute myocardial infarction. *The Lancet* 351: 1467–1471.
19. Warren-Gash C, Hayward AC, Hemingway H, Denaxas S, Thomas SL, et al. (2012) Influenza infection and risk of acute myocardial infarction in England and Wales: a CALIBER self-controlled case series study. *J Infect Dis* 206: 1652–1659.
20. Mytton OT, Rutter PD, Mak M, Stanton E, Sachedina N, et al. (2012) Mortality due to pandemic (H1N1) 2009 influenza in England: a comparison of the first and second waves. *Epidemiology & Infection* 140: 1533–1541.

- 1
- 2
- 3
- 4 21. Bazaz R, Marriott HM, Francis SE, Dockrell DH (2013) Mechanistic links between acute respiratory
- 5 tract infections and acute coronary syndromes. *J Infect* 66: 1-17.
- 6
- 7 22. Harskamp RE, Van Ginkel MW (2008) Acute respiratory tract infections: a potential trigger for the
- 8 acute coronary syndrome. *Annals of Medicine* 40: 121–128.
- 9
- 10 23. Vallance P, Collier J, Bhagat K (1997) Infection, inflammation, and infarction: does acute endothelial
- 11 dysfunction provide a link? *The Lancet* 349: 1391–1392.
- 12

### 13 **Figure legends**

14 **Figure 1** Number of study participants admitted by influenza surveillance week compared to weekly ILI  
15 rates per 100,000 based on national RCGP surveillance data  
16  
17

18 **Figure 2** Percentage of cases (n=70) and controls (n=64) reporting various symptoms during respiratory  
19 illness  
20  
21  
22  
23  
24  
25  
26  
27  
28  
29  
30  
31  
32  
33  
34  
35  
36  
37  
38  
39  
40  
41  
42  
43  
44  
45  
46  
47  
48  
49  
50  
51  
52  
53  
54  
55  
56  
57  
58  
59  
60

| Characteristic                            | Category               | Cases (n=70) | Controls (n=64) | P value |
|-------------------------------------------|------------------------|--------------|-----------------|---------|
| Age group                                 | 40-49                  | 8 (11.4)     | 13 (20.3)       | 0.61    |
|                                           | 50-59                  | 19 (27.1)    | 18 (28.1)       |         |
|                                           | 60-69                  | 19 (27.1)    | 15 (23.4)       |         |
|                                           | 70-79                  | 17 (24.3)    | 11 (17.2)       |         |
|                                           | 80+                    | 7 (10.0)     | 7 (10.9)        |         |
| Gender                                    | Female                 | 13 (18.6)    | 15 (23.4)       | 0.49    |
|                                           | Male                   | 57 (81.4)    | 49 (76.6)       |         |
| Admission month                           | September              | 8 (11.4)     | 7 (10.9)        | 0.92    |
|                                           | October                | 12 (17.1)    | 15 (23.4)       |         |
|                                           | November               | 15 (21.4)    | 14 (21.9)       |         |
|                                           | December               | 10 (14.3)    | 10 (15.6)       |         |
|                                           | January                | 14 (20.0)    | 11 (17.2)       |         |
|                                           | February               | 11 (15.7)    | 7 (10.9)        |         |
| Ethnicity                                 | Asian or Asian British | 18 (25.7)    | 6 (9.4)         | 0.03    |
|                                           | Black or Black British | 2 (2.9)      | 0 (0.0)         |         |
|                                           | Mixed                  | 0 (0.0)      | 1 (1.6)         |         |
|                                           | White                  | 50 (71.4)    | 57 (89.1)       |         |
| BMI category                              | 18.5-24.9              | 20 (30.8)    | 23 (39.0)       | 0.41    |
|                                           | 25.0-29.9              | 36 (55.4)    | 24 (40.7)       |         |
|                                           | 30.0-39.9              | 8 (12.3)     | 10 (17.0)       |         |
|                                           | 40.0-max               | 1 (1.5)      | 2 (3.4)         |         |
| Smoker                                    | No never               | 22 (31.4)    | 23 (35.9)       | 0.77    |
|                                           | Yes current            | 27 (38.6)    | 21 (32.8)       |         |
|                                           | Yes ex                 | 21 (30.0)    | 20 (31.3)       |         |
| Past medical history                      | Hypercholesterolaemia* | 34 (48.6)    | 28 (43.8)       | 0.58    |
|                                           | Diabetes               | 14 (20.0)    | 12 (18.8)       |         |
|                                           | Hypertension           | 37 (52.9)    | 26 (40.6)       |         |
|                                           | AMI                    | 14 (20.0)    | 5 (7.8)         |         |
|                                           | Stroke                 | 1 (1.4)      | 4 (6.3)         |         |
| Family history                            | AMI                    | 43 (61.4)    | 19 (29.7)       | <0.001  |
|                                           | Stroke                 | 5 (7.1)      | 6 (9.4)         |         |
| Influenza vaccination status <sup>†</sup> | Vaccinated             | 30 (42.9)    | 29 (45.3)       | 0.78    |

**Table 1** Characteristics of study participants (n=134)

\*28 cases (40%) and 25 controls (39%) with hypercholesterolaemia reported current statin use

<sup>†</sup>'Vaccinated' refers to receiving influenza vaccination in the current vaccination year (since September 2009).

| Exposure variable                          | Prevalence – cases, n(%) | Prevalence – controls, n(%) | Unadjusted odds ratio (95% CI) | Adjusted odds ratio* (95% CI) |
|--------------------------------------------|--------------------------|-----------------------------|--------------------------------|-------------------------------|
| 1. Respiratory illness                     | 17 (24.3)                | 12 (18.8)                   | 1.39 (0.60-3.19)               | 1.39 (0.56-3.47)              |
| 2. Influenza-like illness                  | 10 (14.3)                | 3 (4.7)                     | 3.39 (0.89-12.92)              | 3.17 (0.61-16.47)             |
| 3. Fever                                   | 11 (15.7)                | 4 (6.3)                     | 2.80 (0.84-9.28)               | 2.42 (0.54-10.98)             |
| 4. Cough                                   | 21 (30.0)                | 10 (15.6)                   | 2.31 (0.99-5.40)               | 2.04 (0.76-5.47)              |
| 5. Sore throat                             | 10 (14.3)                | 8 (12.5)                    | 1.17 (0.43-3.17)               | 1.43 (0.44-4.69)              |
| 6. Muscle ache                             | 8 (11.4)                 | 5 (7.8)                     | 1.52 (0.47-4.92)               | 2.29 (0.59-8.92)              |
| 7. Influenza A IgA antibodies <sup>‡</sup> | 25 (46.3)                | 28 (54.9)                   | 0.71 (0.33-1.53)               | 0.82 (0.34-2.00)              |

**Table 2** Odds ratios for the association between acute myocardial infarction and various respiratory illness exposure variables, unadjusted and adjusted

\* Adjustments were made for age-group, gender, month of admission and influenza vaccination status (all exposures), family history of myocardial infarction (exposures 2, 3, 4 & 5) and personal history of myocardial infarction (exposures 2, 3, 4 & 5)

<sup>‡</sup>Note that n=105 (54 cases and 51 controls) for influenza antibodies where 8 equivocal results were excluded, compared to n=134 (70 cases and 64 controls) for all other exposures.

1  
2  
3 **Title** Influenza-like illness in acute myocardial infarction patients during the winter wave of the influenza

4  
5 A H1N1 pandemic in London: a case control study

6  
7  
8  
9 **Authors** Charlotte Warren-Gash<sup>1</sup>, Anna Maria Geretti<sup>2</sup>, George Hamilton<sup>3</sup>, Roby D. Rakhit<sup>4</sup>, Liam  
10  
11 Smeeth<sup>5</sup>, Andrew C. Hayward<sup>1</sup>

12  
13  
14 **Affiliations**

15  
16  
17 <sup>1</sup>Centre for Infectious Disease Epidemiology, Research Department of Infection & Population Health,  
18  
19 UCL, London, UK

20  
21 <sup>2</sup> Institute of Infection and Global Health, University of Liverpool, UK

22  
23 <sup>3</sup> Department of Vascular Surgery, Royal Free London Foundation Trust, London, UK

24  
25 <sup>4</sup> Department of Cardiology, Royal Free London Foundation Trust, London, UK

26  
27 <sup>5</sup> Department of Non-Communicable Disease Epidemiology, London School of Hygiene & Tropical  
28  
29 Medicine, London, UK

30  
31  
32  
33  
34  
35 **Corresponding author**

36  
37 Dr Charlotte Warren-Gash

38  
39 Research Department of Infection & Population Health

40  
41  
42 1<sup>st</sup> Floor, Royal Free Hospital

43  
44 Rowland Hill Street

45  
46 London NW3 2PF

47  
48 Email: [c.warren-gash@ucl.ac.uk](mailto:c.warren-gash@ucl.ac.uk) / [charlotte.warren-gash@doctors.org.uk](mailto:charlotte.warren-gash@doctors.org.uk)

49  
50  
51  
52  
53 Tel: 020 7794 0500 x36720 Fax: 020 7794 1224

54  
55  
56 **Word Count** Abstract 296, main text 2389 (excluding article summary, tables, figures, legends and refs)



**ABSTRACT**

**Objective:** To investigate recent respiratory and influenza-like illnesses in acute myocardial infarction patients compared to patients hospitalised for acute non vascular surgical conditions during the second wave of the 2009 influenza A H1N1 pandemic

**Design:** Case control study

**Setting:** Coronary care unit, acute cardiology and acute surgical admissions wards in a major teaching hospital in London, UK

**Participants:** 134 participants (70 cases and 64 controls) aged  $\geq 40$  years hospitalised for acute myocardial infarction and acute surgical conditions between 21/09/2009 and 28/02/2010, frequency-matched for gender, 5-year age-band and admission week

**Primary exposure:** Influenza-like illness (ILI - defined as feeling feverish with either cough or sore throat) within the last month. **Secondary exposures:** Acute respiratory illness within the last month not meeting ILI criteria; nasopharyngeal and throat swab positive for influenza virus

**Results:** 29 participants of 134 (21.6%) reported respiratory illness within the last month, of whom 13 (9.7%) had illnesses meeting ILI criteria. The most frequently reported category for timing of respiratory symptom onset was 8-14 days before admission (31.0% of illnesses). Cases were more likely than controls to report ILI – adjusted OR 3.17 (95% confidence interval 0.61-16.47) – as well as other key respiratory symptoms, and were less likely to have received influenza vaccination – adjusted OR 0.46 (95% CI, 0.19-1.12) – although differences were not statistically significant. No swabs were positive for influenza virus.

**Conclusions:** Point estimates suggested that recent ILI was more common in patients hospitalised with acute myocardial infarction than with acute surgical conditions during the second wave of the influenza A H1N1 pandemic, and influenza vaccination was associated with cardio-protection, although findings were not statistically significant. The study was underpowered, partly because the age groups typically

1  
2  
3 affected by acute myocardial infarction had low rates of infection with the pandemic influenza strain  
4  
5 compared to seasonal influenza.  
6  
7  
8  
9

## 10 **ARTICLE SUMMARY**

### 11 **Article focus**

- 12 • Seasonal influenza can trigger cardiovascular complications but the cardiac effects of the 2009  
13 influenza pandemic are less clear.
- 14 • We aimed to investigate recent influenza-like illness in patients hospitalised with acute  
15 myocardial infarction and surgical conditions during the 2009 influenza pandemic in London.  
16  
17  
18  
19  
20  
21  
22  
23

### 24 **Key messages**

- 25 • 14.3% of patients hospitalised with acute myocardial infarction (cases) reported recent  
26 influenza-like illness compared to 4.7% of patients hospitalised for acute surgical conditions  
27 (controls)  
28
- 29 • Cases were more likely than controls to report a range of recent respiratory symptoms and less  
30 likely to have received influenza vaccination though differences were not statistically significant  
31  
32
- 33 • The median age of cases with acute myocardial infarction was 63.6 years, whereas the majority  
34 of people infected with pandemic influenza strain nationally were young  
35  
36  
37  
38  
39  
40  
41  
42

### 43 **Strengths and limitations**

- 44 • The study was underpowered to detect an effect, partly due to low infection rates with the  
45 pandemic influenza virus in age-groups typically affected by acute myocardial infarction, but it  
46 will inform design of future similar studies  
47  
48  
49  
50  
51  
52  
53  
54  
55  
56  
57  
58  
59  
60

## INTRODUCTION

Seasonal influenza can trigger cardiovascular complications and deaths in vulnerable populations, especially the elderly and those with underlying medical conditions<sup>1</sup>. Evidence to support the hypothesis that seasonal influenza may trigger acute myocardial infarction comes from a range of observational studies incorporating the effects of different circulating influenza strains and subtypes<sup>2</sup>. In a pandemic situation, however, when there is global spread of a novel influenza strain, clinical and demographic profiles of those affected may change dramatically.

The most recent influenza pandemic was caused by an influenza A H1N1 strain (H1N1pdm09) that emerged in Mexico and the United States in April 2009<sup>3,4</sup>. The UK experienced several waves of infection with this novel strain - a first wave occurred in spring and summer 2009 followed by a second wave in the winter of 2009/10 and a post-pandemic wave in winter 2010/11<sup>5</sup>. Initial evidence from the first wave in the UK suggested that typical illnesses were mild and affected mainly children and young people<sup>6</sup>. The average age of cases increased over subsequent waves of the pandemic<sup>7</sup> but it is unclear how this affected clinical illness profiles. Vaccination coverage did not reach high levels until the post-pandemic season.

There have been reports of myocarditis, myocardial injury and left ventricular systolic dysfunction, **which may be reversible**, in patients with severe H1N1pdm09<sup>8,9</sup>. It has been suggested that H1N1pdm09 was associated with higher rates of extra-pulmonary complications than seasonal influenza<sup>10</sup> but this is difficult to compare as surveillance of severe influenza-related disease was greatly enhanced during the pandemic. A recent mathematical modelling study estimated that globally there were 83,300 cardiovascular deaths associated with the first twelve months of H1N1pdm09 circulation in adults aged >17 years<sup>11</sup>, but the contribution of myocardial infarction deaths to this figure is unknown.

1  
2  
3 In this study we aimed to investigate whether patients hospitalised for acute myocardial infarction  
4 during the winter wave of the influenza A H1N1 pandemic were more likely than surgical patients to  
5 have experienced recent influenza-like illness or acute respiratory illness, or to have concurrent PCR  
6 positive influenza or evidence of influenza A IgA antibodies in sera.  
7  
8  
9  
10  
11  
12

## 13 METHODS

### 14 Setting, design and participants

15  
16  
17 This was an observational case control study carried out in hospital in-patients at the Royal Free London  
18 NHS Foundation Trust between 21<sup>st</sup> September 2009 and 28<sup>th</sup> February 2010. Cases were patients aged  
19 ≥40 years who had experienced an acute myocardial infarction (defined as a rise in troponin T with  
20 ischaemic symptoms and/or typical ECG changes, or by angiographic evidence of acute coronary artery  
21 thrombosis during primary percutaneous coronary intervention). Controls were patients aged ≥40 years  
22 admitted with an acute surgical condition such as appendicitis, bowel or urinary obstruction and no  
23 history of myocardial infarction within the past month. These patients were chosen as controls because  
24 their admissions were considered unlikely to be influenced by recent influenza-like illness. Cases and  
25 controls were frequency matched for gender, age-group in 5 year age-bands and week of admission. All  
26 were English-speaking and able to provide written informed consent. The study size was based on  
27 numbers of eligible patients hospitalised during the influenza circulation period.  
28  
29  
30  
31  
32  
33  
34  
35  
36  
37  
38  
39  
40  
41  
42  
43  
44  
45

### 46 Exposures

47  
48 The main exposure was recent influenza-like illness, defined as a history of feeling feverish with either  
49 cough or sore throat within the last month. We also used the exposure recent acute respiratory  
50 infection to capture a history of respiratory illness within the last month with any of the following  
51 symptoms – fever, chills, dry cough, productive cough, myalgia, rhinorrhoea, blocked nose, sore throat,  
52  
53  
54  
55  
56  
57  
58  
59  
60

1  
2  
3 wheeze, earache and fatigue – that did not meet criteria for influenza-like illness. Additional exposures  
4  
5 were nasopharyngeal and throat swabs testing positive for influenza by real-time polymerase chain  
6  
7 reaction (PCR), presence of IgA antibodies to influenza A in serum samples and self-reported influenza  
8  
9 vaccination status.  
10

### 11 12 13 **Data sources and measurement**

14  
15  
16 We used a questionnaire to investigate recent respiratory and influenza-like illness as well as to capture  
17  
18 data on demographics, medical history and influenza vaccination status. Information on influenza  
19  
20 vaccination status was collected as 'vaccinated this year (from September 2009)', 'vaccinated last year  
21  
22 (September 2008 - August 2009)', 'vaccinated 2-5 years ago', 'vaccinated >5 years ago' and 'never  
23  
24 vaccinated'. Vaccination status was then re-categorised as a binary variable comprising 'vaccinated this  
25  
26 year' and 'unvaccinated', which included all other categories, to recognise that vaccinations in previous  
27  
28 seasons would not protect against the new circulating pandemic influenza strain. Medical records were  
29  
30 reviewed for details of the current admission and to confirm data on potential confounding factors.  
31  
32 Combined nasopharyngeal and throat swabs were taken from each participant, placed in viral transport  
33  
34 medium and transported to the laboratory for storage at -80°C. Samples were tested for the presence of  
35  
36 influenza virus RNA using a validated in house real-time PCR with a lower limit of detection of 1 RNA  
37  
38 copy per reaction, as previously described<sup>12</sup>. A single serum sample was taken for quantification of IgA  
39  
40 antibodies to influenza A as a marker of recent exposure (as IgA levels peak at around 2 weeks after  
41  
42 exposure and reach baseline by around 4-6 weeks). Serum samples were centrifuged, frozen at -80°C  
43  
44 and batch tested using a commercially available enzyme-linked immunosorbent assay (EIA) for influenza  
45  
46 A IgA (Biosupply UK, cat no. RE56501). Antibody concentrations were initially explored as a continuous  
47  
48 variable, then categorised into 'positive' (>12 U/ml), 'equivocal' (8-12 U/ml) and 'negative' (>8 U/ml)  
49  
50 categories based on standard laboratory thresholds. Equivocal results were dropped for analyses.  
51  
52  
53  
54  
55  
56  
57  
58  
59  
60

## Statistical methods

All analyses were carried out using Stata (*Stata Statistical Software: Release 12. College Station, TX: StataCorp LP*). Baseline comparability between cases and controls was assessed with  $X^2$  tests.

Characteristics of participants with and without missing data were also compared using  $X^2$  tests to assess any risk of bias associated with missing data. We used multivariable logistic regression analysis to investigate associations between recent influenza-like illness or acute respiratory illness exposures and case/ control status, controlling for the frequency-matching factors age-group, gender and month of admission and influenza vaccination status as an a priori confounder (all models) as well as for other potential confounding factors. An additional multivariable model in which influenza vaccination status was the main exposure was generated using the same approach. Potential confounders were examined using a backwards stepwise approach whereby factors independently associated with both exposure and outcome were included in models and likelihood ratio tests used to assess the effect of removing each one sequentially. If p values from likelihood ratio tests were  $<0.1$  then factors were retained in the model.

## RESULTS

### Characteristics of study participants

134 participants were recruited, who comprised 70 cases from 106 approached (acceptance rate 66%) and 64 controls from 95 approached (acceptance rate 67%). Reasons for non-participation included lack of time, unwillingness to experience additional procedures and feeling tired or unwell. The median age of participants was 63.6 years (IQR 53.3-72.6) and 21% were female. Cases were more likely to be of Asian or Asian British ethnicity ( $p=0.016$ ), to have a previous history of myocardial infarction ( $p=0.04$ ) or a family history of myocardial infarction ( $p<0.001$ ) than controls. Of the 70 patients hospitalised for acute myocardial infarction, 48 (68.5%) met criteria for ST-elevation myocardial infarction, 17 (24.3%)

1  
2  
3 had a non ST-elevation myocardial infarction and in 5 (7.1%) cases the subtype of myocardial infarction  
4  
5 was unspecified. Control patients were admitted with a range of acute non-vascular surgical  
6  
7 presentations that included colorectal, urological and orthopaedic conditions.  
8  
9

10  
11 **Table 1**

12  
13  
14 **Timing of participants' admissions in relation to national influenza circulation**

15  
16  
17 A comparison of study participants' dates of admission with national rates of GP consultations for  
18  
19 influenza-like illness (ILI) based on RCGP surveillance data is shown in figure 1. The peak week for ILI  
20  
21 consultations in England was week 43 (ending 25<sup>th</sup> October 2009) when the rate was 42.8 per 100,000.  
22  
23 This was also the peak week for influenza virus circulation according to data from virological sentinel  
24  
25 surveillance schemes, when the proportion of positive samples reached 41.2%. Our recruitment period  
26  
27 spanned this period of peak influenza circulation.  
28  
29

30  
31  
32 **Figure 1**

33  
34 **Recent respiratory and influenza-like illness**

35  
36  
37 17 cases (24.3%) and 12 controls (18.8%) reported respiratory illness in the month preceding hospital  
38  
39 admission. 13 illnesses – reported by 10 cases (14.3%) and 3 controls (4.7%) – met criteria for influenza-  
40  
41 like illness (defined as feeling feverish with cough and/or sore throat). The most frequently reported  
42  
43 category for the timing of respiratory symptom onset was 8-14 days before admission (31.0% of  
44  
45 illnesses). 4-7 days was the most frequently reported category for length of illness (37.9% of illnesses).  
46  
47 Symptom profiles of participants reporting recent respiratory illness are shown in figure 2. No swabs  
48  
49 tested positive for influenza virus nucleic acid. Serum samples were available on 113 of 134 participants  
50  
51 (84.3%). There were no significant differences in characteristics of participants with and without missing  
52  
53 serum samples (data not shown). 25 cases (43.1%) and 28 controls (50.9%) tested positive for serum  
54  
55  
56  
57  
58  
59  
60

1  
2  
3 influenza A IgA antibodies. 62% of participants who were seropositive had received influenza  
4  
5 vaccination during the study period compared to 31% of seronegative participants. Overall 44.0% of  
6  
7 participants were vaccinated. The proportion of participants recruited in each month who were  
8  
9 vaccinated increased from 0% in September 2009, to 29.6% in October 2009, 44.8% in November 2009,  
10  
11 55.0% in December 2009, 72.0% in January 2010 and was 50% in February 2010.  
12  
13

## 14 15 16 Figure 2

17  
18 Cases were more likely to have reported influenza-like illness than controls – adjusted OR 3.17 (95%  
19  
20 confidence interval 0.61-16.47) – as well as other key respiratory illness symptoms, although differences  
21  
22 were not statistically significant. Results from this logistic regression analysis are summarised in table 2.  
23  
24 There was also a trend towards a protective effect of influenza vaccination against myocardial infarction  
25  
26 – adjusted OR 0.46 (95% CI, 0.19-1.12) – after controlling for age-group, gender, month of admission and  
27  
28 personal history of AMI.  
29  
30  
31  
32

## 33 34 35 Table 2

## 36 37 38 DISCUSSION

39  
40 The study was supportive of the hypothesis that recent respiratory and in particular influenza-like  
41  
42 illnesses occurring during the second wave of the influenza A H1N1 pandemic were more common in  
43  
44 patients hospitalised with acute myocardial infarction than with acute surgical conditions. Influenza  
45  
46 vaccination was also associated with protection against myocardial infarction, although differences were  
47  
48 not statistically significant. While we had hypothesised that more adults would be infected during the  
49  
50 second pandemic wave due to the expected upwards shift in age distribution of infections, national  
51  
52 rates of influenza-like illness remained low<sup>5</sup>, especially in age groups typically affected by acute  
53  
54 myocardial infarction. The study was therefore underpowered to detect an effect, partly due to limited  
55  
56 numbers of infections among participants.  
57  
58  
59  
60



1  
2  
3  
4  
5  
6  
7 Using self-reported recent respiratory and influenza-like illness as exposures introduced the possibility  
8  
9 of reporting or recall bias. Nonetheless this method allows greater sensitivity to detect recent  
10  
11 respiratory symptoms than relying on reports of medically attended illnesses, which comprise only a  
12  
13 small minority of influenza cases<sup>13</sup>. As cases and controls were frequency matched on week of  
14  
15 admission, external factors such as media coverage of the influenza pandemic should not have had a  
16  
17 differential effect on respiratory illness reporting. We chose to test both nasopharyngeal and throat  
18  
19 swabs to increase the sensitivity of virus detection. It was perhaps unsurprising, however, that none of  
20  
21 the nasopharyngeal and throat swabs was positive for influenza virus given a) the low rates of infection  
22  
23 in this age-group<sup>5</sup> and b) that the majority of viral shedding in influenza occurs in the first 2-3 days after  
24  
25 symptom onset<sup>14</sup> whereas most reported respiratory symptoms in study participants occurred 8-14 days  
26  
27 before admission. Based on our findings it seems unlikely that any delayed cardiac effect of influenza is  
28  
29 linked to ongoing or prolonged virus replication or shedding in the respiratory tract. Influenza serology  
30  
31 is difficult to interpret in vaccinated participants as it not possible to distinguish antibody rises caused by  
32  
33 infection from those caused by vaccination. Validation of the IgA assay used suggests it has acceptable  
34  
35 sensitivity and specificity to detect recent seasonal influenza A infection<sup>15</sup> but its effect with the  
36  
37 pandemic strain H1N1pdm09 is unclear. It has previously been noted that serological studies carried out  
38  
39 during the 2009 influenza pandemic were severely hampered by cross reactivity both with vaccine and  
40  
41 with seasonal influenza strains<sup>7</sup>.

42  
43  
44  
45  
46  
47  
48  
49  
50 Previous observational studies using large electronic primary care databases have found an association  
51  
52 between GP consultation for acute respiratory infection in the last month and risk of acute myocardial  
53  
54 infarction<sup>16-18</sup>. Although studies were conducted over different time periods, they encompassed the  
55  
56 effect of varying seasonal influenza strains. Our recent self-controlled case series study using linked  
57  
58  
59  
60

1  
2  
3 primary care and cardiac disease registry data from 3,927 patients also included acute respiratory  
4  
5 infection consultations occurring during the first wave of H1N1pdm09 circulation<sup>19</sup>. We found an  
6  
7 incidence ratio for acute myocardial infarction of 4.19 (95% confidence interval 3.18-5.53) in the first 1-3  
8  
9 days after acute respiratory infection, with the risk falling to baseline after 28 days<sup>19</sup>. Elderly people and  
10  
11 those consulting for an infection judged most likely to be due to influenza were at greatest risk. During  
12  
13 the 2009 influenza pandemic people with underlying cardiovascular disease were much more likely to  
14  
15 be hospitalised<sup>13</sup> and to die<sup>20</sup> from a range of causes attributable to pandemic influenza. Although most  
16  
17 deaths from H1N1pdm09 occurred in younger people, this was partly a function of the age distribution  
18  
19 of infections: in the UK the case fatality rate in the elderly was much higher than in younger age-groups<sup>5</sup>  
20  
21 but overall numbers of deaths were small as few elderly people were infected.  
22  
23  
24  
25  
26  
27

28  
29 Various biological mechanisms are proposed to underlie a relationship between influenza or acute  
30  
31 respiratory infection and myocardial infarction<sup>21</sup>. Acute respiratory infections may result in a host of  
32  
33 acute inflammatory and haemostatic effects leading to systemic inflammation, altered plasma viscosity,  
34  
35 coagulability and haemodynamic changes<sup>22</sup> as well as promoting local endothelial dysfunction, coronary  
36  
37 inflammation and plaque rupture<sup>23</sup>. Immobility associated with bed-rest and dehydration might  
38  
39 potentiate these processes.  
40  
41  
42  
43  
44

45  
46 In conclusion, this study suggests that recent ILI occurring during the 2009 influenza pandemic was more  
47  
48 common in AMI patients. Taken in the context of previous work, this helps to support the hypothesis  
49  
50 that, as with other influenza strains, H1N1pdm09 could potentially trigger AMI in vulnerable groups. It  
51  
52 is likely, however, that the effect is not specific to influenza and could have also been due to other  
53  
54 viruses circulating at the time. The population impact of H1N1pdm09 on rates of hospitalisations and  
55  
56 deaths from myocardial infarction is also likely to have been relatively low given the mismatch between  
57  
58  
59  
60

1  
2  
3 the ages of those typically affected by H1N1pdm09 and acute coronary events as well as the relatively  
4  
5 mild clinical effects of this influenza strain.  
6  
7  
8  
9

### 10 **Acknowledgments**

11  
12  
13 We thank all patients who agreed to participate in this study and nurses on the cardiology and surgical  
14  
15 wards at the Royal Free Hospital who helped to identify potential participants. We acknowledge Mauli  
16  
17 Patel at the Royal Free Virology Laboratory who kindly processed, stored and tested samples.  
18  
19

### 20 **Contributors**

21  
22  
23 CWG conceived and designed the study, recruited participants, collected and analysed data and wrote  
24  
25 the manuscript. AMG, GH, RDR, LS and ACH assisted with study design. AMG provided laboratory  
26  
27 resources. CWG, AMG, RDR, LS and ACH interpreted results. AMG, GH, RDR, LS and ACH critically  
28  
29 revised the manuscript for intellectual content. LS and ACH provided supervision. All authors approved  
30  
31 the final version of the manuscript.  
32  
33  
34  
35

### 36 **Funding statement**

37  
38  
39 This work was funded by a Medical Research Council Clinical Research Training Fellowship for CWG,  
40  
41 grant number G0800689. LS is supported by a Wellcome Trust Senior Research Fellowship in Clinical  
42  
43 Science, grant number 098504/Z/12/Z.  
44  
45  
46

### 47 **Competing interests statement**

48  
49  
50 None declared  
51  
52

### 53 **Data sharing statement**

54  
55  
56 No additional data are available  
57  
58  
59  
60

## References

1. Cox NJ, Subbarao K (1999) Influenza. *The Lancet* 354: 1277–1282.
2. Warren-Gash C, Smeeth L, Hayward AC (2009) Influenza as a trigger for acute myocardial infarction or death from cardiovascular disease: a systematic review. *The Lancet Infectious Diseases* 9: 601–610.
3. Swine influenza A (H1N1) infection in two children – Southern California, March–April 2009 (2009). *MMWR Morb Mortal Wkly Rep* 58: 400–402.
4. Outbreak of swine-origin influenza A (H1N1) virus infection – Mexico, March–April 2009 (2009). *MMWR Morb Mortal Wkly Rep* 58: 467–470.
5. Health Protection Agency (2010) Epidemiological report of pandemic (H1N1) 2009 in the United Kingdom: April 2009 - May 2010.
6. McLean E, Pebody RG, Campbell C, Chamberland M, Hawkins C, et al. (2010) Pandemic (H1N1) 2009 influenza in the UK: clinical and epidemiological findings from the first few hundred (FF100) cases. *Epidemiol Infect* 138: 1531–1541.
7. Lagacé-Wiens PRS, Rubinstein E, Gumel A (2010) Influenza epidemiology – past, present, and future. *Crit Care Med* 38: e1–e9.
8. Chacko B, Peter JV, Pichamuthu K, Ramakrishna K, Moorthy M, et al. (2012) Cardiac manifestations in patients with pandemic (H1N1) 2009 virus infection needing intensive care. *J Crit Care* 27: 106.e1–6.
9. Martin SS, Hollingsworth CL, Norfolk SG, Wolfe CR, Hollingsworth JW. (2010) Reversible cardiac dysfunction associated with pandemic 2009 influenza A (H1N1). *Chest* 137: 1195-7.
10. Lee N, Chan PKS, Lui GCY, Wong BCK, Sin WWY, et al. (2011) Complications and Outcomes of Pandemic 2009 Influenza A (H1N1) Virus Infection in Hospitalized Adults: How Do They Differ From Those in Seasonal Influenza? *J Infect Dis* 203: 1739–1747.
11. Dawood FS, Iuliano AD, Reed C, Meltzer MI, Shay DK, et al. (2012) Estimated global mortality associated with the first 12 months of 2009 pandemic influenza A H1N1 virus circulation: a modelling study. *The Lancet Infectious Diseases* 12: 687–695.
12. Khanom AB, Velvin C, Hawrami K, Schutten M, Patel M, et al. (2011) Performance of a nurse-led paediatric point of care service for respiratory syncytial virus testing in secondary care. *J Infect* 62: 52–58.
13. Campbell CNJ, Mytton OT, McLean EM, Rutter PD, Pebody RG, et al. (2010) Hospitalization in two waves of pandemic influenza A(H1N1) in England. *Epidemiology & Infection* 139: 1560–1569.
14. Lau LLH, Cowling BJ, Fang VJ, Chan K-H, Lau EHY, et al. (2010) Viral shedding and clinical illness in naturally acquired influenza virus infections. *J Infect Dis* 201: 1509–1516.
15. Rothbarth PH, Groen J, Bohnen AM, De Groot R, Osterhaus AD (1999) Influenza virus serology – a comparative study. *J Virol Methods* 78: 163–169.
16. Smeeth L, Thomas SL, Hall AJ, Hubbard R, Farrington P, et al. (2004) Risk of myocardial infarction and stroke after acute infection or vaccination. *New England Journal of Medicine* 351: 2611–2618.
17. Clayton TC, Thompson M, Meade TW (2008) Recent respiratory infection and risk of cardiovascular disease: case-control study through a general practice database. *Eur Heart J* 29: 96–103.
18. Meier CR, Jick SS, Derby LE, Vasilakis C, Jick H, et al. (1998) Acute respiratory-tract infections and risk of first-time acute myocardial infarction. *The Lancet* 351: 1467–1471.
19. Warren-Gash C, Hayward AC, Hemingway H, Denaxas S, Thomas SL, et al. (2012) Influenza infection and risk of acute myocardial infarction in England and Wales: a CALIBER self-controlled case series study. *J Infect Dis* 206: 1652–1659.
20. Mytton OT, Rutter PD, Mak M, Stanton E, Sachedina N, et al. (2012) Mortality due to pandemic (H1N1) 2009 influenza in England: a comparison of the first and second waves. *Epidemiology & Infection* 140: 1533–1541.

- 1
- 2
- 3
- 4 21. Bazaz R, Marriott HM, Francis SE, Dockrell DH (2013) Mechanistic links between acute respiratory
- 5 tract infections and acute coronary syndromes. *J Infect* 66: 1-17.
- 6
- 7 22. Harskamp RE, Van Ginkel MW (2008) Acute respiratory tract infections: a potential trigger for the
- 8 acute coronary syndrome. *Annals of Medicine* 40: 121–128.
- 9
- 10 23. Vallance P, Collier J, Bhagat K (1997) Infection, inflammation, and infarction: does acute endothelial
- 11 dysfunction provide a link? *The Lancet* 349: 1391–1392.

### 12 **Figure legends**

13

14 **Figure 1** Number of study participants admitted by influenza surveillance week compared to weekly ILI

15 rates per 100,000 based on national RCGP surveillance data

16

17

18

19

20 **Figure 2** Percentage of cases (n=70) and controls (n=64) reporting various symptoms during respiratory

21 illness

22

23

24

25

26

27

28

29

30

31

32

33

34

35

36

37

38

39

40

41

42

43

44

45

46

47

48

49

50

51

52

53

54

55

56

57

58

59

60

| Characteristic                | Category               | Cases (n=70) | Controls (n=64) | P value |
|-------------------------------|------------------------|--------------|-----------------|---------|
| Age group                     | 40-49                  | 8 (11.4)     | 13 (20.3)       | 0.61    |
|                               | 50-59                  | 19 (27.1)    | 18 (28.1)       |         |
|                               | 60-69                  | 19 (27.1)    | 15 (23.4)       |         |
|                               | 70-79                  | 17 (24.3)    | 11 (17.2)       |         |
|                               | 80+                    | 7 (10.0)     | 7 (10.9)        |         |
| Gender                        | Female                 | 13 (18.6)    | 15 (23.4)       | 0.49    |
|                               | Male                   | 57 (81.4)    | 49 (76.6)       |         |
| Admission month               | September              | 8 (11.4)     | 7 (10.9)        | 0.92    |
|                               | October                | 12 (17.1)    | 15 (23.4)       |         |
|                               | November               | 15 (21.4)    | 14 (21.9)       |         |
|                               | December               | 10 (14.3)    | 10 (15.6)       |         |
|                               | January                | 14 (20.0)    | 11 (17.2)       |         |
|                               | February               | 11 (15.7)    | 7 (10.9)        |         |
| Ethnicity                     | Asian or Asian British | 18 (25.7)    | 6 (9.4)         | 0.03    |
|                               | Black or Black British | 2 (2.9)      | 0 (0.0)         |         |
|                               | Mixed                  | 0 (0.0)      | 1 (1.6)         |         |
|                               | White                  | 50 (71.4)    | 57 (89.1)       |         |
| BMI category                  | 18.5-24.9              | 20 (30.8)    | 23 (39.0)       | 0.41    |
|                               | 25.0-29.9              | 36 (55.4)    | 24 (40.7)       |         |
|                               | 30.0-39.9              | 8 (12.3)     | 10 (17.0)       |         |
|                               | 40.0-max               | 1 (1.5)      | 2 (3.4)         |         |
| Smoker                        | No never               | 22 (31.4)    | 23 (35.9)       | 0.77    |
|                               | Yes current            | 27 (38.6)    | 21 (32.8)       |         |
|                               | Yes ex                 | 21 (30.0)    | 20 (31.3)       |         |
| Past medical history          | Hypercholesterolaemia* | 34 (48.6)    | 28 (43.8)       | 0.58    |
|                               | Diabetes               | 14 (20.0)    | 12 (18.8)       | 0.86    |
|                               | Hypertension           | 37 (52.9)    | 26 (40.6)       | 0.16    |
|                               | AMI                    | 14 (20.0)    | 5 (7.8)         | 0.04    |
|                               | Stroke                 | 1 (1.4)      | 4 (6.3)         | 0.14    |
| Family history                | AMI                    | 43 (61.4)    | 19 (29.7)       | <0.001  |
|                               | Stroke                 | 5 (7.1)      | 6 (9.4)         | 0.64    |
| Influenza vaccination status† | Vaccinated             | 30 (42.9)    | 29 (45.3)       | 0.78    |

**Table 1** Characteristics of study participants (n=134)

\*28 cases (40%) and 25 controls (39%) with hypercholesterolaemia reported current statin use

<sup>†</sup>'Vaccinated' refers to receiving influenza vaccination in the current vaccination year (since September 2009).

| Exposure variable                          | Prevalence – cases, n(%) | Prevalence – controls, n(%) | Unadjusted odds ratio (95% CI) | Adjusted odds ratio* (95% CI) |
|--------------------------------------------|--------------------------|-----------------------------|--------------------------------|-------------------------------|
| 1. Respiratory illness                     | 17 (24.3)                | 12 (18.8)                   | 1.39 (0.60-3.19)               | 1.39 (0.56-3.47)              |
| 2. Influenza-like illness                  | 10 (14.3)                | 3 (4.7)                     | 3.39 (0.89-12.92)              | 3.17 (0.61-16.47)             |
| 3. Fever                                   | 11 (15.7)                | 4 (6.3)                     | 2.80 (0.84-9.28)               | 2.42 (0.54-10.98)             |
| 4. Cough                                   | 21 (30.0)                | 10 (15.6)                   | 2.31 (0.99-5.40)               | 2.04 (0.76-5.47)              |
| 5. Sore throat                             | 10 (14.3)                | 8 (12.5)                    | 1.17 (0.43-3.17)               | 1.43 (0.44-4.69)              |
| 6. Muscle ache                             | 8 (11.4)                 | 5 (7.8)                     | 1.52 (0.47-4.92)               | 2.29 (0.59-8.92)              |
| 7. Influenza A IgA antibodies <sup>‡</sup> | 25 (46.3)                | 28 (54.9)                   | 0.71 (0.33-1.53)               | 0.82 (0.34-2.00)              |

**Table 2** Odds ratios for the association between acute myocardial infarction and various respiratory illness exposure variables, unadjusted and adjusted

\* Adjustments were made for age-group, gender, month of admission and influenza vaccination status (all exposures), family history of myocardial infarction (exposures 2, 3, 4 & 5) and personal history of myocardial infarction (exposures 2, 3, 4 & 5)

<sup>‡</sup>Note that n=105 (54 cases and 51 controls) for influenza antibodies where 8 equivocal results were excluded, compared to n=134 (70 cases and 64 controls) for all other exposures.

1  
2  
3  
4  
5  
6  
7  
8  
9  
10  
11  
12  
13  
14  
15  
16  
17  
18  
19  
20  
21  
22  
23  
24  
25  
26  
27  
28  
29  
30  
31  
32  
33  
34  
35  
36  
37  
38  
39  
40  
41  
42  
43  
44  
45  
46  
47  
48  
49  
50  
51  
52  
53  
54  
55  
56  
57  
58  
59  
60

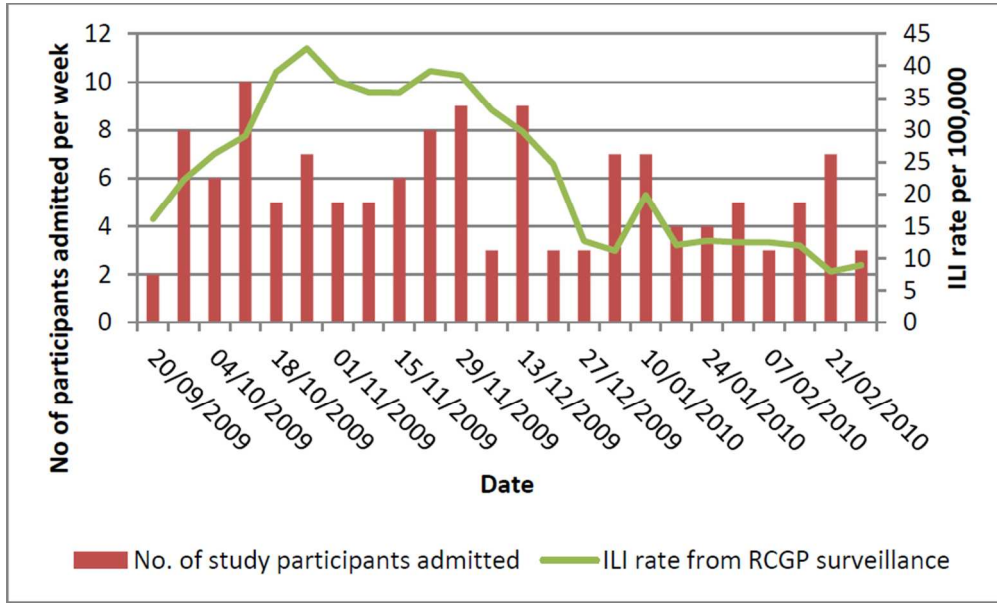

Number of study participants admitted by influenza surveillance week compared to weekly ILI rates per 100,000 based on national RCGP surveillance data  
 264x158mm (96 x 96 DPI)

review only





Percentage of cases (n=70) and controls (n=64) reporting various symptoms during respiratory illness  
264x158mm (96 x 96 DPI)

Review only

STROBE Statement—Checklist of items that should be included in reports of *case-control studies*

|                              | Item No | Recommendation                                                                                                                                                                       | Reported on page no.                                                                                  |
|------------------------------|---------|--------------------------------------------------------------------------------------------------------------------------------------------------------------------------------------|-------------------------------------------------------------------------------------------------------|
| <b>Title and abstract</b>    | 1       | (a) Indicate the study's design with a commonly used term in the title or the abstract                                                                                               | 1                                                                                                     |
|                              |         | (b) Provide in the abstract an informative and balanced summary of what was done and what was found                                                                                  | 2                                                                                                     |
| <b>Introduction</b>          |         |                                                                                                                                                                                      |                                                                                                       |
| Background/rationale         | 2       | Explain the scientific background and rationale for the investigation being reported                                                                                                 | 4                                                                                                     |
| Objectives                   | 3       | State specific objectives, including any prespecified hypotheses                                                                                                                     | 5                                                                                                     |
| <b>Methods</b>               |         |                                                                                                                                                                                      |                                                                                                       |
| Study design                 | 4       | Present key elements of study design early in the paper                                                                                                                              | 5                                                                                                     |
| Setting                      | 5       | Describe the setting, locations, and relevant dates, including periods of recruitment, exposure, follow-up, and data collection                                                      | 5-6                                                                                                   |
| Participants                 | 6       | (a) Give the eligibility criteria, and the sources and methods of case ascertainment and control selection. Give the rationale for the choice of cases and controls                  | 5                                                                                                     |
|                              |         | (b) For matched studies, give matching criteria and the number of controls per case                                                                                                  | Frequency matching criteria given on p5                                                               |
| Variables                    | 7       | Clearly define all outcomes, exposures, predictors, potential confounders, and effect modifiers. Give diagnostic criteria, if applicable                                             | 5-7                                                                                                   |
| Data sources/<br>measurement | 8*      | For each variable of interest, give sources of data and details of methods of assessment (measurement). Describe comparability of assessment methods if there is more than one group | 6                                                                                                     |
| Bias                         | 9       | Describe any efforts to address potential sources of bias                                                                                                                            | 6                                                                                                     |
| Study size                   | 10      | Explain how the study size was arrived at                                                                                                                                            | Study size based on numbers of eligible patients hospitalised during the influenza circulation period |
| Quantitative variables       | 11      | Explain how quantitative variables were handled in the analyses. If applicable, describe which groupings were chosen and why                                                         | 6                                                                                                     |
| Statistical methods          | 12      | (a) Describe all statistical methods, including those used to control for confounding                                                                                                | 6-7                                                                                                   |
|                              |         | (b) Describe any methods used to examine subgroups and interactions                                                                                                                  | N/A                                                                                                   |
|                              |         | (c) Explain how missing data were addressed                                                                                                                                          | 6                                                                                                     |
|                              |         | (d) If applicable, explain how matching of cases and controls was addressed                                                                                                          | N/A                                                                                                   |

|                  |     |                                                                                                                                                                                                              |                                                                                                                              |
|------------------|-----|--------------------------------------------------------------------------------------------------------------------------------------------------------------------------------------------------------------|------------------------------------------------------------------------------------------------------------------------------|
|                  |     | (e) Describe any sensitivity analyses                                                                                                                                                                        | N/A                                                                                                                          |
| <b>Results</b>   |     |                                                                                                                                                                                                              |                                                                                                                              |
| Participants     | 13* | (a) Report numbers of individuals at each stage of study—eg numbers potentially eligible, examined for eligibility, confirmed eligible, included in the study, completing follow-up, and analysed            | 7                                                                                                                            |
|                  |     | (b) Give reasons for non-participation at each stage                                                                                                                                                         | Data not systematically collected but reasons for non-participation include lack of time and feeling unwell during admission |
|                  |     | (c) Consider use of a flow diagram                                                                                                                                                                           | Not done as no follow up with this study design. Fig 1 shows recruitment over time.                                          |
| Descriptive data | 14* | (a) Give characteristics of study participants (eg demographic, clinical, social) and information on exposures and potential confounders                                                                     | Table 1                                                                                                                      |
|                  |     | (b) Indicate number of participants with missing data for each variable of interest                                                                                                                          | Table 1 and p8                                                                                                               |
| Outcome data     | 15* | Report numbers in each exposure category, or summary measures of exposure                                                                                                                                    | 8                                                                                                                            |
| Main results     | 16  | (a) Give unadjusted estimates and, if applicable, confounder-adjusted estimates and their precision (eg, 95% confidence interval). Make clear which confounders were adjusted for and why they were included | Table 2                                                                                                                      |
|                  |     | (b) Report category boundaries when continuous variables were categorized                                                                                                                                    | 6                                                                                                                            |
|                  |     | (c) If relevant, consider translating estimates of relative risk into absolute risk for a meaningful time period                                                                                             | N/A                                                                                                                          |

|                          |    |                                                                                                                                                                            |      |
|--------------------------|----|----------------------------------------------------------------------------------------------------------------------------------------------------------------------------|------|
| Other analyses           | 17 | Report other analyses done—eg analyses of subgroups and interactions, and sensitivity analyses                                                                             | N/A  |
| <b>Discussion</b>        |    |                                                                                                                                                                            |      |
| Key results              | 18 | Summarise key results with reference to study objectives                                                                                                                   | 9    |
| Limitations              | 19 | Discuss limitations of the study, taking into account sources of potential bias or imprecision. Discuss both direction and magnitude of any potential bias                 | 9-10 |
| Interpretation           | 20 | Give a cautious overall interpretation of results considering objectives, limitations, multiplicity of analyses, results from similar studies, and other relevant evidence | 11   |
| Generalisability         | 21 | Discuss the generalisability (external validity) of the study results                                                                                                      | 11   |
| <b>Other information</b> |    |                                                                                                                                                                            |      |
| Funding                  | 22 | Give the source of funding and the role of the funders for the present study and, if applicable, for the original study on which the present article is based              | 12   |

\*Give information separately for cases and controls.

**Note:** An Explanation and Elaboration article discusses each checklist item and gives methodological background and published examples of transparent reporting. The STROBE checklist is best used in conjunction with this article (freely available on the Web sites of PLoS Medicine at <http://www.plosmedicine.org/>, Annals of Internal Medicine at <http://www.annals.org/>, and Epidemiology at <http://www.epidem.com/>). Information on the STROBE Initiative is available at <http://www.strobe-statement.org>.



**Influenza-like illness in acute myocardial infarction patients during the winter wave of the influenza A H1N1 pandemic in London: a case control study**

|                                 |                                                                                                                                                                                                                                                                                                                                                                                                                                                                                                                                      |
|---------------------------------|--------------------------------------------------------------------------------------------------------------------------------------------------------------------------------------------------------------------------------------------------------------------------------------------------------------------------------------------------------------------------------------------------------------------------------------------------------------------------------------------------------------------------------------|
| Journal:                        | <i>BMJ Open</i>                                                                                                                                                                                                                                                                                                                                                                                                                                                                                                                      |
| Manuscript ID:                  | bmjopen-2013-002604.R2                                                                                                                                                                                                                                                                                                                                                                                                                                                                                                               |
| Article Type:                   | Research                                                                                                                                                                                                                                                                                                                                                                                                                                                                                                                             |
| Date Submitted by the Author:   | 27-Mar-2013                                                                                                                                                                                                                                                                                                                                                                                                                                                                                                                          |
| Complete List of Authors:       | Warren-Gash, Charlotte; UCL, Research Department of Infection & Population Health<br>Geretti, Anna Maria; University of Liverpool, Institute of Infection and Global Health<br>Hamilton, George; Royal Free London Foundation Trust, Department of Vascular Surgery<br>Rakhit, Roby; Royal Free London Foundation Trust, Department of Cardiology<br>Smeeth, Liam; London School of Hygiene and Tropical Medicine, Epidemiology and Population Health<br>Hayward, Andrew; University College London, Infection and Population Health |
| <b>Primary Subject Heading</b>: | Epidemiology                                                                                                                                                                                                                                                                                                                                                                                                                                                                                                                         |
| Secondary Subject Heading:      | Infectious diseases, Cardiovascular medicine                                                                                                                                                                                                                                                                                                                                                                                                                                                                                         |
| Keywords:                       | Myocardial infarction < CARDIOLOGY, Epidemiology < INFECTIOUS DISEASES, PUBLIC HEALTH                                                                                                                                                                                                                                                                                                                                                                                                                                                |
|                                 |                                                                                                                                                                                                                                                                                                                                                                                                                                                                                                                                      |

SCHOLARONE™  
Manuscripts

1  
2  
3 **Title** Influenza-like illness in acute myocardial infarction patients during the winter wave of the influenza  
4  
5 A H1N1 pandemic in London: a case control study  
6  
7

8  
9 **Authors** Charlotte Warren-Gash<sup>1</sup>, Anna Maria Geretti<sup>2</sup>, George Hamilton<sup>3</sup>, Roby D. Rakhit<sup>4</sup>, Liam  
10  
11 Smeeth<sup>5</sup>, Andrew C. Hayward<sup>1</sup>  
12  
13

14  
15 **Affiliations**

16  
17 <sup>1</sup>Centre for Infectious Disease Epidemiology, Research Department of Infection & Population Health,  
18  
19 UCL, London, UK  
20  
21

22 <sup>2</sup> Institute of Infection and Global Health, University of Liverpool, UK  
23

24 <sup>3</sup> Department of Vascular Surgery, Royal Free London Foundation Trust, London, UK  
25

26 <sup>4</sup> Department of Cardiology, Royal Free London Foundation Trust, London, UK  
27

28 <sup>5</sup> Department of Non-Communicable Disease Epidemiology, London School of Hygiene & Tropical  
29  
30  
31  
32  
33  
34  
35  
36  
37  
38  
39  
40  
41  
42  
43  
44  
45  
46  
47  
48  
49  
50  
51  
52  
53  
54  
55  
56  
57  
58  
59  
60  
Medicine, London, UK

36 **Corresponding author**

37  
38 Dr Charlotte Warren-Gash

39  
40 Research Department of Infection & Population Health

41  
42 1<sup>st</sup> Floor, Royal Free Hospital

43  
44 Rowland Hill Street

45  
46 London NW3 2PF

47  
48 Email: [c.warren-gash@ucl.ac.uk](mailto:c.warren-gash@ucl.ac.uk) / [charlotte.warren-gash@doctors.org.uk](mailto:charlotte.warren-gash@doctors.org.uk)

49  
50  
51  
52  
53  
54  
55  
56  
57  
58  
59  
60  
Tel: 020 7794 0500 x36720 Fax: 020 7794 1224

**Word Count** Abstract 296, main text 2505 (excluding article summary, tables, figures, legends and refs)

**ABSTRACT**

**Objective:** To investigate recent respiratory and influenza-like illnesses in acute myocardial infarction patients compared to patients hospitalised for acute non vascular surgical conditions during the second wave of the 2009 influenza A H1N1 pandemic

**Design:** Case control study

**Setting:** Coronary care unit, acute cardiology and acute surgical admissions wards in a major teaching hospital in London, UK

**Participants:** 134 participants (70 cases and 64 controls) aged  $\geq 40$  years hospitalised for acute myocardial infarction and acute surgical conditions between 21/09/2009 and 28/02/2010, frequency-matched for gender, 5-year age-band and admission week

**Primary exposure:** Influenza-like illness (ILI - defined as feeling feverish with either cough or sore throat) within the last month. **Secondary exposures:** Acute respiratory illness within the last month not meeting ILI criteria; nasopharyngeal and throat swab positive for influenza virus

**Results:** 29 participants of 134 (21.6%) reported respiratory illness within the last month, of whom 13 (9.7%) had illnesses meeting ILI criteria. The most frequently reported category for timing of respiratory symptom onset was 8-14 days before admission (31.0% of illnesses). Cases were more likely than controls to report ILI – adjusted OR 3.17 (95% confidence interval 0.61-16.47) – as well as other key respiratory symptoms, and were less likely to have received influenza vaccination – adjusted OR 0.46 (95% CI, 0.19-1.12) – although differences were not statistically significant. No swabs were positive for influenza virus.

**Conclusions:** Point estimates suggested that recent ILI was more common in patients hospitalised with acute myocardial infarction than with acute surgical conditions during the second wave of the influenza A H1N1 pandemic, and influenza vaccination was associated with cardio-protection, although findings were not statistically significant. The study was underpowered, partly because the age groups typically

1  
2  
3 affected by acute myocardial infarction had low rates of infection with the pandemic influenza strain  
4  
5 compared to seasonal influenza.  
6  
7  
8  
9

## 10 **ARTICLE SUMMARY**

### 11 **Article focus**

- 12 • Seasonal influenza can trigger cardiovascular complications but the cardiac effects of the 2009  
13 influenza pandemic are less clear.
- 14 • We aimed to investigate recent influenza-like illness in patients hospitalised with acute  
15 myocardial infarction and surgical conditions during the 2009 influenza pandemic in London.  
16  
17  
18  
19  
20  
21  
22  
23

### 24 **Key messages**

- 25 • 14.3% of patients hospitalised with acute myocardial infarction (cases) reported recent  
26 influenza-like illness compared to 4.7% of patients hospitalised for acute surgical conditions  
27 (controls)
- 28 • Cases were more likely than controls to report a range of recent respiratory symptoms and less  
29 likely to have received influenza vaccination though differences were not statistically significant  
30  
31  
32
- 33 • The median age of cases with acute myocardial infarction was 63.6 years, whereas the majority  
34 of people infected with pandemic influenza strain nationally were young  
35  
36  
37  
38  
39  
40  
41  
42

### 43 **Strengths and limitations**

- 44 • The study was underpowered to detect an effect, partly due to low infection rates with the  
45 pandemic influenza virus in age-groups typically affected by acute myocardial infarction, but it  
46 will inform design of future similar studies  
47  
48  
49  
50  
51  
52  
53  
54  
55  
56  
57  
58  
59  
60



## INTRODUCTION

Seasonal influenza can trigger cardiovascular complications and deaths in vulnerable populations, especially the elderly and those with underlying medical conditions<sup>1</sup>. Evidence to support the hypothesis that seasonal influenza may trigger acute myocardial infarction comes from a range of observational studies incorporating the effects of different circulating influenza strains and subtypes<sup>2</sup>. In a pandemic situation, however, when there is global spread of a novel influenza strain, clinical and demographic profiles of those affected may change dramatically.

The most recent influenza pandemic was caused by an influenza A H1N1 strain (H1N1pdm09) that emerged in Mexico and the United States in April 2009<sup>3,4</sup>. The UK experienced several waves of infection with this novel strain - a first wave occurred in spring and summer 2009 followed by a second wave in the winter of 2009/10 and a post-pandemic wave in winter 2010/11<sup>5</sup>. Initial evidence from the first wave in the UK suggested that typical illnesses were mild and affected mainly children and young people<sup>6</sup>. The average age of cases increased over subsequent waves of the pandemic<sup>7</sup> but it is unclear how this affected clinical illness profiles. Vaccination coverage did not reach high levels until the post-pandemic season.

There have been reports of myocarditis, myocardial injury and left ventricular systolic dysfunction, which may be reversible, in patients with severe H1N1pdm09<sup>8,9</sup>. It has been suggested that H1N1pdm09 was associated with higher rates of extra-pulmonary complications than seasonal influenza<sup>10</sup> but this is difficult to compare as surveillance of severe influenza-related disease was greatly enhanced during the pandemic. A recent mathematical modelling study estimated that globally there were 83,300 cardiovascular deaths associated with the first twelve months of H1N1pdm09 circulation in adults aged >17 years<sup>11</sup>, but the contribution of myocardial infarction deaths to this figure is unknown.

1  
2  
3 In this study we aimed to investigate whether patients hospitalised for acute myocardial infarction  
4 during the winter wave of the influenza A H1N1 pandemic were more likely than surgical patients to  
5 have experienced recent influenza-like illness or acute respiratory illness, or to have concurrent PCR  
6 positive influenza or evidence of influenza A IgA antibodies in sera.  
7  
8  
9  
10  
11  
12

## 13 **METHODS**

### 14 **Setting, design and participants**

15  
16  
17  
18  
19  
20 This was an observational case control study carried out in hospital in-patients at the Royal Free London  
21 NHS Foundation Trust between 21<sup>st</sup> September 2009 and 28<sup>th</sup> February 2010. Cases were patients aged  
22 ≥40 years who had experienced an acute myocardial infarction (defined as a rise in troponin T with  
23 ischaemic symptoms and/or typical ECG changes, or by angiographic evidence of acute coronary artery  
24 thrombosis during primary percutaneous coronary intervention). Controls were patients aged ≥40 years  
25 admitted with an acute surgical condition such as appendicitis, bowel or urinary obstruction and no  
26 history of myocardial infarction within the past month. These patients were chosen as controls because  
27 their admissions were considered unlikely to be influenced by recent influenza-like illness. Cases and  
28 controls were frequency matched for gender, age-group in 5 year age-bands and week of admission. All  
29 were English-speaking and able to provide written informed consent. The study size was based on  
30 numbers of eligible patients hospitalised during the influenza circulation period.  
31  
32  
33  
34  
35  
36  
37  
38  
39  
40  
41  
42  
43  
44  
45

### 46 **Exposures**

47  
48  
49 The main exposure was recent influenza-like illness, defined as a history of feeling feverish with either  
50 cough or sore throat within the last month. We also used the exposure recent acute respiratory  
51 infection to capture a history of respiratory illness within the last month with any of the following  
52 symptoms – fever, chills, dry cough, productive cough, myalgia, rhinorrhoea, blocked nose, sore throat,  
53  
54  
55  
56  
57  
58  
59  
60

1  
2  
3 wheeze, earache and fatigue – that did not meet criteria for influenza-like illness. Additional exposures  
4  
5 were nasopharyngeal and throat swabs testing positive for influenza by real-time polymerase chain  
6  
7 reaction (PCR), presence of IgA antibodies to influenza A in serum samples and self-reported influenza  
8  
9 vaccination status.  
10

### 11 12 13 **Data sources and measurement**

14  
15  
16 We used a questionnaire to investigate recent respiratory and influenza-like illness as well as to capture  
17  
18 data on demographics, medical history and influenza vaccination status. Information on influenza  
19  
20 vaccination status was collected as ‘vaccinated this year (from September 2009)’, ‘vaccinated last year  
21  
22 (September 2008 - August 2009)’, ‘vaccinated 2-5 years ago’, ‘vaccinated >5 years ago’ and ‘never  
23  
24 vaccinated’. Vaccination status was then re-categorised as a binary variable comprising ‘vaccinated this  
25  
26 year’ and ‘unvaccinated’, which included all other categories, to recognise that vaccinations in previous  
27  
28 seasons would not protect against the new circulating pandemic influenza strain. Medical records were  
29  
30 reviewed for details of the current admission and to confirm data on potential confounding factors.  
31  
32 Combined nasopharyngeal and throat swabs were taken from each participant, placed in viral transport  
33  
34 medium and transported to the laboratory for storage at -80°C. Samples were tested for the presence of  
35  
36 influenza virus RNA using a validated in house real-time PCR with a lower limit of detection of 1 RNA  
37  
38 copy per reaction, as previously described<sup>12</sup>. A single serum sample was taken for quantification of IgA  
39  
40 antibodies to influenza A as a marker of recent exposure (as IgA levels peak at around 2 weeks after  
41  
42 exposure and reach baseline by around 4-6 weeks). Serum samples were centrifuged, frozen at -80°C  
43  
44 and batch tested using a commercially available enzyme-linked immunosorbent assay (EIA) for influenza  
45  
46 A IgA (Biosupply UK, cat no. RE56501). Antibody concentrations were initially explored as a continuous  
47  
48 variable, then categorised into ‘positive’ (>12 U/ml), ‘equivocal’ (8-12 U/ml) and ‘negative’ (>8 U/ml)  
49  
50 categories based on standard laboratory thresholds. Equivocal results were dropped for analyses.  
51  
52  
53  
54  
55  
56  
57  
58  
59  
60

## Statistical methods

All analyses were carried out using Stata (*Stata Statistical Software: Release 12. College Station, TX: StataCorp LP*). Baseline comparability between cases and controls was assessed with  $\chi^2$  tests.

Characteristics of participants with and without missing data were also compared using  $\chi^2$  tests to assess any risk of bias associated with missing data. We used multivariable logistic regression analysis to investigate associations between recent influenza-like illness or acute respiratory illness exposures and case/ control status, controlling for the frequency-matching factors age-group, gender and month of admission and influenza vaccination status as an a priori confounder (all models) as well as for other potential confounding factors. An additional multivariable model in which influenza vaccination status was the main exposure was generated using the same approach. Potential confounders were examined using a backwards stepwise approach whereby factors independently associated with both exposure and outcome were included in models and likelihood ratio tests used to assess the effect of removing each one sequentially. If p values from likelihood ratio tests were  $<0.1$  then factors were retained in the model.

## RESULTS

### Characteristics of study participants

134 participants were recruited, who comprised 70 cases from 106 approached (acceptance rate 66%) and 64 controls from 95 approached (acceptance rate 67%). Reasons for non-participation included lack of time, unwillingness to experience additional procedures and feeling tired or unwell. The median age of participants was 63.6 years (IQR 53.3-72.6) and 21% were female. Cases were more likely to be of Asian or Asian British ethnicity ( $p=0.016$ ), to have a previous history of myocardial infarction ( $p=0.04$ ) or a family history of myocardial infarction ( $p<0.001$ ) than controls. Of the 70 patients hospitalised for acute myocardial infarction, 48 (68.5%) met criteria for ST-elevation myocardial infarction, 17 (24.3%)

1  
2  
3 had a non ST-elevation myocardial infarction and in 5 (7.1%) cases the subtype of myocardial infarction  
4  
5 was unspecified. Control patients were admitted with a range of acute non-vascular surgical  
6  
7 presentations that included colorectal, urological and orthopaedic conditions.  
8  
9

10  
11 **Table 1**

12  
13  
14 **Timing of participants' admissions in relation to national influenza circulation**

15  
16  
17 A comparison of study participants' dates of admission with national rates of GP consultations for  
18  
19 influenza-like illness (ILI) based on RCGP surveillance data is shown in figure 1. The peak week for ILI  
20  
21 consultations in England was week 43 (ending 25<sup>th</sup> October 2009) when the rate was 42.8 per 100,000.  
22  
23 This was also the peak week for influenza virus circulation according to data from virological sentinel  
24  
25 surveillance schemes, when the proportion of positive samples reached 41.2%. Our recruitment period  
26  
27 spanned this period of peak influenza circulation.  
28  
29

30  
31  
32 **Figure 1**

33  
34 **Recent respiratory and influenza-like illness**

35  
36  
37 17 cases (24.3%) and 12 controls (18.8%) reported respiratory illness in the month preceding hospital  
38  
39 admission. 13 illnesses – reported by 10 cases (14.3%) and 3 controls (4.7%) – met criteria for influenza-  
40  
41 like illness (defined as feeling feverish with cough and/or sore throat). The most frequently reported  
42  
43 category for the timing of respiratory symptom onset was 8-14 days before admission (31.0% of  
44  
45 illnesses). 4-7 days was the most frequently reported category for length of illness (37.9% of illnesses).  
46  
47 Symptom profiles of participants reporting recent respiratory illness are shown in figure 2. No swabs  
48  
49 tested positive for influenza virus nucleic acid. Serum samples were available on 113 of 134 participants  
50  
51 (84.3%). There were no significant differences in characteristics of participants with and without missing  
52  
53 serum samples (data not shown). 25 cases (43.1%) and 28 controls (50.9%) tested positive for serum  
54  
55  
56  
57  
58  
59  
60

1  
2  
3 influenza A IgA antibodies. 62% of participants who were seropositive had received influenza  
4  
5 vaccination during the study period compared to 31% of seronegative participants. Overall 44.0% of  
6  
7 participants were vaccinated. The proportion of participants recruited in each month who were  
8  
9 vaccinated increased from 0% in September 2009, to 29.6% in October 2009, 44.8% in November 2009,  
10  
11 55.0% in December 2009, 72.0% in January 2010 and was 50% in February 2010.  
12  
13

### 14 15 16 **Figure 2**

17  
18 Cases were more likely to have reported influenza-like illness than controls – adjusted OR 3.17 (95%  
19  
20 confidence interval 0.61-16.47) – as well as other key respiratory illness symptoms, although differences  
21  
22 were not statistically significant. Results from this logistic regression analysis are summarised in table 2.  
23  
24 There was also a trend towards a protective effect of influenza vaccination against myocardial infarction  
25  
26 – adjusted OR 0.46 (95% CI, 0.19-1.12) – after controlling for age-group, gender, month of admission and  
27  
28 personal history of AMI.  
29  
30  
31  
32

### 33 **Table 2**

## 34 35 36 **DISCUSSION**

37  
38  
39 The study was supportive of the hypothesis that recent respiratory and in particular influenza-like  
40  
41 illnesses occurring during the second wave of the influenza A H1N1 pandemic were more common in  
42  
43 patients hospitalised with acute myocardial infarction than with acute surgical conditions. Influenza  
44  
45 vaccination was also associated with protection against myocardial infarction, although differences were  
46  
47 not statistically significant. While we had hypothesised that more adults would be infected during the  
48  
49 second pandemic wave due to the expected upwards shift in age distribution of infections, national  
50  
51 rates of influenza-like illness remained low<sup>5</sup>, especially in age groups typically affected by acute  
52  
53 myocardial infarction. The study was therefore underpowered to detect an effect, partly due to limited  
54  
55 numbers of infections among participants.  
56  
57  
58  
59  
60

1  
2  
3  
4  
5  
6  
7 Using self-reported recent respiratory and influenza-like illness as exposures introduced the possibility  
8  
9 of reporting or recall bias. Nonetheless this method allows greater sensitivity to detect recent  
10  
11 respiratory symptoms than relying on reports of medically attended illnesses, which comprise only a  
12  
13 small minority of influenza cases<sup>13</sup>. As cases and controls were frequency matched on week of  
14  
15 admission, external factors such as media coverage of the influenza pandemic should not have had a  
16  
17 differential effect on respiratory illness reporting. We chose to test both nasopharyngeal and throat  
18  
19 swabs to increase the sensitivity of virus detection. It was perhaps unsurprising, however, that none of  
20  
21 the nasopharyngeal and throat swabs was positive for influenza virus given a) the low rates of infection  
22  
23 in this age-group<sup>5</sup> and b) that the majority of viral shedding in influenza occurs in the first 2-3 days after  
24  
25 symptom onset<sup>14</sup> whereas most reported respiratory symptoms in study participants occurred 8-14 days  
26  
27 before admission. Based on our findings it seems unlikely that any delayed cardiac effect of influenza is  
28  
29 linked to ongoing or prolonged virus replication or shedding in the respiratory tract. Influenza serology  
30  
31 is difficult to interpret in vaccinated participants as it not possible to distinguish antibody rises caused by  
32  
33 infection from those caused by vaccination. Validation of the IgA assay used suggests it has acceptable  
34  
35 sensitivity and specificity to detect recent seasonal influenza A infection<sup>15</sup> but its effect with the  
36  
37 pandemic strain H1N1pdm09 is unclear. It has previously been noted that serological studies carried out  
38  
39 during the 2009 influenza pandemic were severely hampered by cross reactivity both with vaccine and  
40  
41 with seasonal influenza strains<sup>7</sup>.

42  
43  
44  
45  
46  
47  
48  
49  
50 Previous observational studies using large electronic primary care databases have found an association  
51  
52 between GP consultation for acute respiratory infection in the last month and risk of acute myocardial  
53  
54 infarction<sup>16-18</sup>. Although studies were conducted over different time periods, they encompassed the  
55  
56 effect of varying seasonal influenza strains. In the present study, we controlled for important potential  
57  
58  
59  
60

1  
2  
3 confounders such as influenza vaccination status, and showed that statin use was equally prevalent in  
4 cases and controls. We did not, however, have complete data on other drugs that have been  
5  
6 hypothesised to have immune-regulatory effects (such as ACE inhibitors ,angiotensin receptor blockers  
7  
8 (ARBs), metformin, glitazones and fibrates). If these agents reduce the likelihood of people experiencing  
9  
10 ILI and were more commonly used in cases than controls they could potentially have confounded the  
11  
12 relationship between ILI and AMI. It was reassuring, however, that our results were consistent with  
13  
14 those obtained in our recent self-controlled case series study - a design that implicitly controls for fixed  
15  
16 confounders. In this study we used linked primary care and cardiac disease registry records from 3,927  
17  
18 patients from 2003-2009, which also included acute respiratory infection consultations occurring during  
19  
20 the first wave of H1N1pdm09 circulation<sup>19</sup>. We found an incidence ratio for acute myocardial infarction  
21  
22 of 4.19 (95% confidence interval 3.18-5.53) in the first 1-3 days after acute respiratory infection, with  
23  
24 the risk falling to baseline after 28 days<sup>19</sup>. Elderly people and those consulting for an infection judged  
25  
26 most likely to be due to influenza were at greatest risk. During the 2009 influenza pandemic people  
27  
28 with underlying cardiovascular disease were much more likely to be hospitalised<sup>13</sup> and to die<sup>20</sup> from a  
29  
30 range of causes attributable to pandemic influenza. Although most deaths from H1N1pdm09 occurred  
31  
32 in younger people, this was partly a function of the age distribution of infections: in the UK the case  
33  
34 fatality rate in the elderly was much higher than in younger age-groups<sup>5</sup> but overall numbers of deaths  
35  
36 were small as few elderly people were infected.  
37  
38  
39  
40  
41  
42  
43  
44  
45  
46

47 Various biological mechanisms are proposed to underlie a relationship between influenza or acute  
48  
49 respiratory infection and myocardial infarction<sup>21</sup>. Acute respiratory infections may result in a host of  
50  
51 acute inflammatory and haemostatic effects leading to systemic inflammation, altered plasma viscosity,  
52  
53 coagulability and haemodynamic changes<sup>22</sup> as well as promoting local endothelial dysfunction, coronary  
54  
55  
56  
57  
58  
59  
60



1  
2  
3 inflammation and plaque rupture<sup>23</sup>. Immobility associated with bed-rest and dehydration might  
4  
5 potentiate these processes.  
6  
7  
8  
9

10 In conclusion, this study suggests that recent ILI occurring during the 2009 influenza pandemic was more  
11  
12 common in AMI patients. Taken in the context of previous work, this helps to support the hypothesis  
13  
14 that, as with other influenza strains, H1N1pdm09 could potentially trigger AMI in vulnerable groups. It  
15  
16 is likely, however, that the effect is not specific to influenza and could have also been due to other  
17  
18 viruses circulating at the time. The population impact of H1N1pdm09 on rates of hospitalisations and  
19  
20 deaths from myocardial infarction is also likely to have been relatively low given the mismatch between  
21  
22 the ages of those typically affected by H1N1pdm09 and acute coronary events as well as the relatively  
23  
24 mild clinical effects of this influenza strain.  
25  
26  
27  
28  
29  
30

### 31 **Acknowledgments**

32  
33  
34 We thank all patients who agreed to participate in this study and nurses on the cardiology and surgical  
35  
36 wards at the Royal Free Hospital who helped to identify potential participants. We acknowledge Mauli  
37  
38 Patel at the Royal Free Virology Laboratory who kindly processed, stored and tested samples.  
39  
40

### 41 **Contributors**

42  
43  
44 CWG conceived and designed the study, recruited participants, collected and analysed data and wrote  
45  
46 the manuscript. AMG, GH, RDR, LS and ACH assisted with study design. AMG provided laboratory  
47  
48 resources. CWG, AMG, RDR, LS and ACH interpreted results. AMG, GH, RDR, LS and ACH critically  
49  
50 revised the manuscript for intellectual content. LS and ACH provided supervision. All authors approved  
51  
52 the final version of the manuscript.  
53  
54  
55  
56  
57  
58  
59  
60

### Funding statement

This work was funded by a Medical Research Council Clinical Research Training Fellowship for CWG, grant number G0800689. LS is supported by a Wellcome Trust Senior Research Fellowship in Clinical Science, grant number 098504/Z/12/Z.

### Competing interests statement

None declared

### Data sharing statement

No additional data are available

### References

1. Cox NJ, Subbarao K (1999) Influenza. *The Lancet* 354: 1277–1282.
2. Warren-Gash C, Smeeth L, Hayward AC (2009) Influenza as a trigger for acute myocardial infarction or death from cardiovascular disease: a systematic review. *The Lancet Infectious Diseases* 9: 601–610.
3. Swine influenza A (H1N1) infection in two children – Southern California, March–April 2009 (2009). *MMWR Morb Mortal Wkly Rep* 58: 400–402.
4. Outbreak of swine-origin influenza A (H1N1) virus infection – Mexico, March–April 2009 (2009). *MMWR Morb Mortal Wkly Rep* 58: 467–470.
5. Health Protection Agency (2010) Epidemiological report of pandemic (H1N1) 2009 in the United Kingdom: April 2009 - May 2010.
6. McLean E, Pebody RG, Campbell C, et al. (2010) Pandemic (H1N1) 2009 influenza in the UK: clinical and epidemiological findings from the first few hundred (FF100) cases. *Epidemiol Infect* 138: 1531–1541.
7. Lagacé-Wiens PRS, Rubinstein E, Gumel A (2010) Influenza epidemiology – past, present, and future. *Crit Care Med* 38: e1–e9.
8. Chacko B, Peter JV, Pichamuthu K, et al. (2012) Cardiac manifestations in patients with pandemic (H1N1) 2009 virus infection needing intensive care. *J Crit Care* 27: 106.e1–6.
9. Martin SS, Hollingsworth CL, Norfolk SG, et al. (2010) Reversible cardiac dysfunction associated with pandemic 2009 influenza A (H1N1). *Chest* 137: 1195–7.
10. Lee N, Chan PKS, Lui GCY, et al. (2011) Complications and Outcomes of Pandemic 2009 Influenza A (H1N1) Virus Infection in Hospitalized Adults: How Do They Differ From Those in Seasonal Influenza? *J Infect Dis* 203: 1739–1747.
11. Dawood FS, Iuliano AD, Reed C, et al. (2012) Estimated global mortality associated with the first 12 months of 2009 pandemic influenza A H1N1 virus circulation: a modelling study. *The Lancet Infectious Diseases* 12: 687–695.

12. Khanom AB, Velvin C, Hawrami K, et al. (2011) Performance of a nurse-led paediatric point of care service for respiratory syncytial virus testing in secondary care. *J Infect* 62: 52–58.
13. Campbell CNJ, Mytton OT, McLean EM, et al. (2010) Hospitalization in two waves of pandemic influenza A(H1N1) in England. *Epidemiology & Infection* 139: 1560–1569.
14. Lau LLH, Cowling BJ, Fang VJ, et al. (2010) Viral shedding and clinical illness in naturally acquired influenza virus infections. *J Infect Dis* 201: 1509–1516.
15. Rothbarth PH, Groen J, Bohnen AM, et al. *J Virol Methods* 78: 163–169.
16. Smeeth L, Thomas SL, Hall AJ, et al. (2004) Risk of myocardial infarction and stroke after acute infection or vaccination. *New England Journal of Medicine* 351: 2611–2618.
17. Clayton TC, Thompson M, Meade TW (2008) Recent respiratory infection and risk of cardiovascular disease: case-control study through a general practice database. *Eur Heart J* 29: 96–103.
18. Meier CR, Jick SS, Derby LE, et al. (1998) Acute respiratory-tract infections and risk of first-time acute myocardial infarction. *The Lancet* 351: 1467–1471.
19. Warren-Gash C, Hayward AC, Hemingway H, et al. (2012) Influenza infection and risk of acute myocardial infarction in England and Wales: a CALIBER self-controlled case series study. *J Infect Dis* 206: 1652–1659.
20. Mytton OT, Rutter PD, Mak M, et al. (2012) Mortality due to pandemic (H1N1) 2009 influenza in England: a comparison of the first and second waves. *Epidemiology & Infection* 140: 1533–1541.
21. Bazaz R, Marriott HM, Francis SE, et al. (2013) Mechanistic links between acute respiratory tract infections and acute coronary syndromes. *J Infect* 66: 1-17.
22. Harskamp RE, Van Ginkel MW (2008) Acute respiratory tract infections: a potential trigger for the acute coronary syndrome. *Annals of Medicine* 40: 121–128.
23. Vallance P, Collier J, Bhagat K (1997) Infection, inflammation, and infarction: does acute endothelial dysfunction provide a link? *The Lancet* 349: 1391–1392.

### Figure legends

**Figure 1** Number of study participants admitted by influenza surveillance week compared to weekly ILI rates per 100,000 based on national RCGP surveillance data

**Figure 2** Percentage of cases (n=70) and controls (n=64) reporting various symptoms during respiratory illness

| Characteristic                            | Category               | Cases (n=70) | Controls (n=64) | P value |
|-------------------------------------------|------------------------|--------------|-----------------|---------|
| Age group                                 | 40-49                  | 8 (11.4)     | 13 (20.3)       | 0.61    |
|                                           | 50-59                  | 19 (27.1)    | 18 (28.1)       |         |
|                                           | 60-69                  | 19 (27.1)    | 15 (23.4)       |         |
|                                           | 70-79                  | 17 (24.3)    | 11 (17.2)       |         |
|                                           | 80+                    | 7 (10.0)     | 7 (10.9)        |         |
| Gender                                    | Female                 | 13 (18.6)    | 15 (23.4)       | 0.49    |
|                                           | Male                   | 57 (81.4)    | 49 (76.6)       |         |
| Admission month                           | September              | 8 (11.4)     | 7 (10.9)        | 0.92    |
|                                           | October                | 12 (17.1)    | 15 (23.4)       |         |
|                                           | November               | 15 (21.4)    | 14 (21.9)       |         |
|                                           | December               | 10 (14.3)    | 10 (15.6)       |         |
|                                           | January                | 14 (20.0)    | 11 (17.2)       |         |
|                                           | February               | 11 (15.7)    | 7 (10.9)        |         |
| Ethnicity                                 | Asian or Asian British | 18 (25.7)    | 6 (9.4)         | 0.03    |
|                                           | Black or Black British | 2 (2.9)      | 0 (0.0)         |         |
|                                           | Mixed                  | 0 (0.0)      | 1 (1.6)         |         |
|                                           | White                  | 50 (71.4)    | 57 (89.1)       |         |
| BMI category                              | 18.5-24.9              | 20 (30.8)    | 23 (39.0)       | 0.41    |
|                                           | 25.0-29.9              | 36 (55.4)    | 24 (40.7)       |         |
|                                           | 30.0-39.9              | 8 (12.3)     | 10 (17.0)       |         |
|                                           | 40.0-max               | 1 (1.5)      | 2 (3.4)         |         |
| Smoker                                    | No never               | 22 (31.4)    | 23 (35.9)       | 0.77    |
|                                           | Yes current            | 27 (38.6)    | 21 (32.8)       |         |
|                                           | Yes ex                 | 21 (30.0)    | 20 (31.3)       |         |
| Past medical history                      | Hypercholesterolaemia* | 34 (48.6)    | 28 (43.8)       | 0.58    |
|                                           | Diabetes               | 14 (20.0)    | 12 (18.8)       | 0.86    |
|                                           | Hypertension           | 37 (52.9)    | 26 (40.6)       | 0.16    |
|                                           | AMI                    | 14 (20.0)    | 5 (7.8)         | 0.04    |
|                                           | Stroke                 | 1 (1.4)      | 4 (6.3)         | 0.14    |
| Family history                            | AMI                    | 43 (61.4)    | 19 (29.7)       | <0.001  |
|                                           | Stroke                 | 5 (7.1)      | 6 (9.4)         | 0.64    |
| Influenza vaccination status <sup>†</sup> | Vaccinated             | 30 (42.9)    | 29 (45.3)       | 0.78    |

**Table 1** Characteristics of study participants (n=134)

\*28 cases (40%) and 25 controls (39%) with hypercholesterolaemia reported current statin use

<sup>†</sup>'Vaccinated' refers to receiving influenza vaccination in the current vaccination year (since September 2009).

| Exposure variable                          | Prevalence – cases, n(%) | Prevalence – controls, n(%) | Unadjusted odds ratio (95% CI) | Adjusted odds ratio* (95% CI) |
|--------------------------------------------|--------------------------|-----------------------------|--------------------------------|-------------------------------|
| 1. Respiratory illness                     | 17 (24.3)                | 12 (18.8)                   | 1.39 (0.60-3.19)               | 1.39 (0.56-3.47)              |
| 2. Influenza-like illness                  | 10 (14.3)                | 3 (4.7)                     | 3.39 (0.89-12.92)              | 3.17 (0.61-16.47)             |
| 3. Fever                                   | 11 (15.7)                | 4 (6.3)                     | 2.80 (0.84-9.28)               | 2.42 (0.54-10.98)             |
| 4. Cough                                   | 21 (30.0)                | 10 (15.6)                   | 2.31 (0.99-5.40)               | 2.04 (0.76-5.47)              |
| 5. Sore throat                             | 10 (14.3)                | 8 (12.5)                    | 1.17 (0.43-3.17)               | 1.43 (0.44-4.69)              |
| 6. Muscle ache                             | 8 (11.4)                 | 5 (7.8)                     | 1.52 (0.47-4.92)               | 2.29 (0.59-8.92)              |
| 7. Influenza A IgA antibodies <sup>‡</sup> | 25 (46.3)                | 28 (54.9)                   | 0.71 (0.33-1.53)               | 0.82 (0.34-2.00)              |

**Table 2** Odds ratios for the association between acute myocardial infarction and various respiratory illness exposure variables, unadjusted and adjusted

\*Adjustments were made for age-group, gender, month of admission and influenza vaccination status (all exposures), family history of myocardial infarction (exposures 2, 3, 4 & 5) and personal history of myocardial infarction (exposures 2, 3, 4 & 5)

<sup>‡</sup>Note that n=105 (54 cases and 51 controls) for influenza antibodies where 8 equivocal results were excluded, compared to n=134 (70 cases and 64 controls) for all other exposures.

1  
2  
3  
4  
5  
6  
7  
8  
9  
10  
11  
12  
13  
14  
15  
16  
17  
18  
19  
20  
21  
22  
23  
24  
25  
26  
27  
28  
29  
30  
31  
32  
33  
34  
35  
36  
37  
38  
39  
40  
41  
42  
43  
44  
45  
46  
47  
48  
49  
50  
51  
52  
53  
54  
55  
56  
57  
58  
59  
60

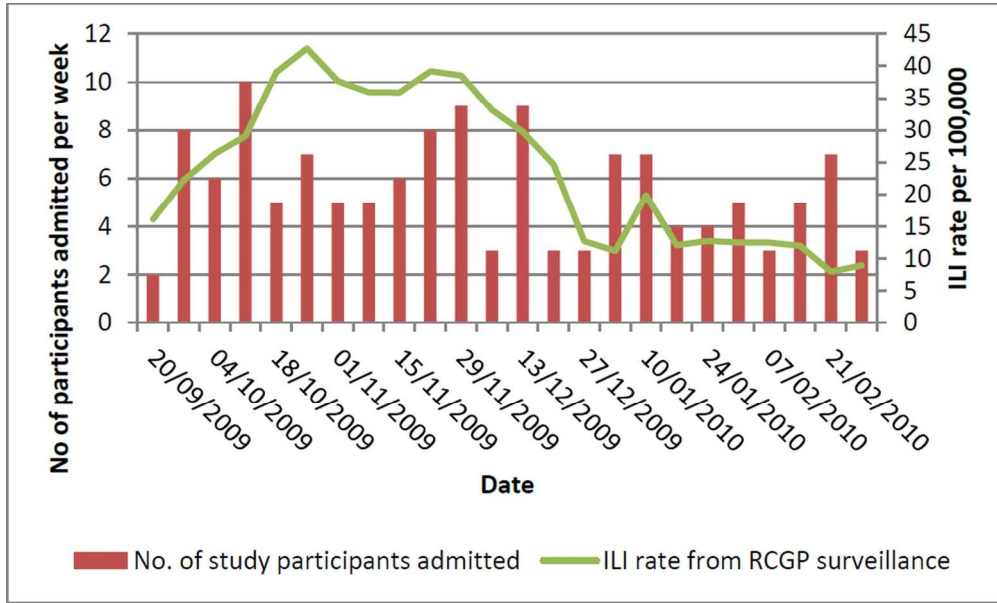

Number of study participants admitted by influenza surveillance week compared to weekly ILI rates per 100,000 based on national RCGP surveillance data  
 150x90mm (300 x 300 DPI)

review only

1  
2  
3 **Title** Influenza-like illness in acute myocardial infarction patients during the winter wave of the influenza  
4  
5 A H1N1 pandemic in London: a case control study  
6  
7

8  
9 **Authors** Charlotte Warren-Gash<sup>1</sup>, Anna Maria Geretti<sup>2</sup>, George Hamilton<sup>3</sup>, Roby D. Rakhit<sup>4</sup>, Liam  
10  
11 Smeeth<sup>5</sup>, Andrew C. Hayward<sup>1</sup>  
12  
13

#### 14 **Affiliations**

15  
16  
17 <sup>1</sup>Centre for Infectious Disease Epidemiology, Research Department of Infection & Population Health,  
18  
19 UCL, London, UK  
20

21  
22 <sup>2</sup> Institute of Infection and Global Health, University of Liverpool, UK  
23

24  
25 <sup>3</sup> Department of Vascular Surgery, Royal Free London Foundation Trust, London, UK  
26

27  
28 <sup>4</sup> Department of Cardiology, Royal Free London Foundation Trust, London, UK  
29

30  
31 <sup>5</sup> Department of Non-Communicable Disease Epidemiology, London School of Hygiene & Tropical  
32  
33 Medicine, London, UK  
34  
35

#### 36 **Corresponding author**

37  
38 Dr Charlotte Warren-Gash

39  
40 Research Department of Infection & Population Health

41  
42 1<sup>st</sup> Floor, Royal Free Hospital

43  
44 Rowland Hill Street

45  
46 London NW3 2PF

47  
48 Email: [c.warren-gash@ucl.ac.uk](mailto:c.warren-gash@ucl.ac.uk) / [charlotte.warren-gash@doctors.org.uk](mailto:charlotte.warren-gash@doctors.org.uk)  
49  
50

51  
52  
53 Tel: 020 7794 0500 x36720 Fax: 020 7794 1224  
54

55  
56 **Word Count** Abstract 296, main text 2505 (excluding article summary, tables, figures, legends and refs)  
57  
58  
59  
60

**ABSTRACT**

**Objective:** To investigate recent respiratory and influenza-like illnesses in acute myocardial infarction patients compared to patients hospitalised for acute non vascular surgical conditions during the second wave of the 2009 influenza A H1N1 pandemic

**Design:** Case control study

**Setting:** Coronary care unit, acute cardiology and acute surgical admissions wards in a major teaching hospital in London, UK

**Participants:** 134 participants (70 cases and 64 controls) aged  $\geq 40$  years hospitalised for acute myocardial infarction and acute surgical conditions between 21/09/2009 and 28/02/2010, frequency-matched for gender, 5-year age-band and admission week

**Primary exposure:** Influenza-like illness (ILI - defined as feeling feverish with either cough or sore throat) within the last month. **Secondary exposures:** Acute respiratory illness within the last month not meeting ILI criteria; nasopharyngeal and throat swab positive for influenza virus

**Results:** 29 participants of 134 (21.6%) reported respiratory illness within the last month, of whom 13 (9.7%) had illnesses meeting ILI criteria. The most frequently reported category for timing of respiratory symptom onset was 8-14 days before admission (31.0% of illnesses). Cases were more likely than controls to report ILI – adjusted OR 3.17 (95% confidence interval 0.61-16.47) – as well as other key respiratory symptoms, and were less likely to have received influenza vaccination – adjusted OR 0.46 (95% CI, 0.19-1.12) – although differences were not statistically significant. No swabs were positive for influenza virus.

**Conclusions:** Point estimates suggested that recent ILI was more common in patients hospitalised with acute myocardial infarction than with acute surgical conditions during the second wave of the influenza A H1N1 pandemic, and influenza vaccination was associated with cardio-protection, although findings were not statistically significant. The study was underpowered, partly because the age groups typically



1  
2  
3 affected by acute myocardial infarction had low rates of infection with the pandemic influenza strain  
4  
5 compared to seasonal influenza.  
6  
7  
8  
9

## 10 **ARTICLE SUMMARY**

### 11 **Article focus**

- 12 • Seasonal influenza can trigger cardiovascular complications but the cardiac effects of the 2009  
13 influenza pandemic are less clear.
- 14 • We aimed to investigate recent influenza-like illness in patients hospitalised with acute  
15 myocardial infarction and surgical conditions during the 2009 influenza pandemic in London.  
16  
17  
18  
19  
20  
21  
22  
23

### 24 **Key messages**

- 25 • 14.3% of patients hospitalised with acute myocardial infarction (cases) reported recent  
26 influenza-like illness compared to 4.7% of patients hospitalised for acute surgical conditions  
27 (controls)  
28
- 29 • Cases were more likely than controls to report a range of recent respiratory symptoms and less  
30 likely to have received influenza vaccination though differences were not statistically significant  
31  
32
- 33 • The median age of cases with acute myocardial infarction was 63.6 years, whereas the majority  
34 of people infected with pandemic influenza strain nationally were young  
35  
36  
37  
38  
39  
40  
41  
42

### 43 **Strengths and limitations**

- 44 • The study was underpowered to detect an effect, partly due to low infection rates with the  
45 pandemic influenza virus in age-groups typically affected by acute myocardial infarction, but it  
46 will inform design of future similar studies  
47  
48  
49  
50  
51  
52  
53  
54  
55  
56  
57  
58  
59  
60

## INTRODUCTION

Seasonal influenza can trigger cardiovascular complications and deaths in vulnerable populations, especially the elderly and those with underlying medical conditions<sup>1</sup>. Evidence to support the hypothesis that seasonal influenza may trigger acute myocardial infarction comes from a range of observational studies incorporating the effects of different circulating influenza strains and subtypes<sup>2</sup>. In a pandemic situation, however, when there is global spread of a novel influenza strain, clinical and demographic profiles of those affected may change dramatically.

The most recent influenza pandemic was caused by an influenza A H1N1 strain (H1N1pdm09) that emerged in Mexico and the United States in April 2009<sup>3,4</sup>. The UK experienced several waves of infection with this novel strain - a first wave occurred in spring and summer 2009 followed by a second wave in the winter of 2009/10 and a post-pandemic wave in winter 2010/11<sup>5</sup>. Initial evidence from the first wave in the UK suggested that typical illnesses were mild and affected mainly children and young people<sup>6</sup>. The average age of cases increased over subsequent waves of the pandemic<sup>7</sup> but it is unclear how this affected clinical illness profiles. Vaccination coverage did not reach high levels until the post-pandemic season.

There have been reports of myocarditis, myocardial injury and left ventricular systolic dysfunction, which may be reversible, in patients with severe H1N1pdm09<sup>8,9</sup>. It has been suggested that H1N1pdm09 was associated with higher rates of extra-pulmonary complications than seasonal influenza<sup>10</sup> but this is difficult to compare as surveillance of severe influenza-related disease was greatly enhanced during the pandemic. A recent mathematical modelling study estimated that globally there were 83,300 cardiovascular deaths associated with the first twelve months of H1N1pdm09 circulation in adults aged >17 years<sup>11</sup>, but the contribution of myocardial infarction deaths to this figure is unknown.

1  
2  
3 In this study we aimed to investigate whether patients hospitalised for acute myocardial infarction  
4 during the winter wave of the influenza A H1N1 pandemic were more likely than surgical patients to  
5 have experienced recent influenza-like illness or acute respiratory illness, or to have concurrent PCR  
6 positive influenza or evidence of influenza A IgA antibodies in sera.  
7  
8  
9  
10  
11  
12

## 13 **METHODS**

### 14 **Setting, design and participants**

15  
16  
17  
18  
19  
20 This was an observational case control study carried out in hospital in-patients at the Royal Free London  
21 NHS Foundation Trust between 21<sup>st</sup> September 2009 and 28<sup>th</sup> February 2010. Cases were patients aged  
22  $\geq 40$  years who had experienced an acute myocardial infarction (defined as a rise in troponin T with  
23 ischaemic symptoms and/or typical ECG changes, or by angiographic evidence of acute coronary artery  
24 thrombosis during primary percutaneous coronary intervention). Controls were patients aged  $\geq 40$  years  
25 admitted with an acute surgical condition such as appendicitis, bowel or urinary obstruction and no  
26 history of myocardial infarction within the past month. These patients were chosen as controls because  
27 their admissions were considered unlikely to be influenced by recent influenza-like illness. Cases and  
28 controls were frequency matched for gender, age-group in 5 year age-bands and week of admission. All  
29 were English-speaking and able to provide written informed consent. The study size was based on  
30 numbers of eligible patients hospitalised during the influenza circulation period.  
31  
32  
33  
34  
35  
36  
37  
38  
39  
40  
41  
42  
43  
44  
45

### 46 **Exposures**

47  
48  
49 The main exposure was recent influenza-like illness, defined as a history of feeling feverish with either  
50 cough or sore throat within the last month. We also used the exposure recent acute respiratory  
51 infection to capture a history of respiratory illness within the last month with any of the following  
52 symptoms – fever, chills, dry cough, productive cough, myalgia, rhinorrhoea, blocked nose, sore throat,  
53  
54  
55  
56  
57  
58  
59  
60

1  
2  
3 wheeze, earache and fatigue – that did not meet criteria for influenza-like illness. Additional exposures  
4  
5 were nasopharyngeal and throat swabs testing positive for influenza by real-time polymerase chain  
6  
7 reaction (PCR), presence of IgA antibodies to influenza A in serum samples and self-reported influenza  
8  
9 vaccination status.  
10

### 11 12 13 **Data sources and measurement**

14  
15  
16 We used a questionnaire to investigate recent respiratory and influenza-like illness as well as to capture  
17  
18 data on demographics, medical history and influenza vaccination status. Information on influenza  
19  
20 vaccination status was collected as 'vaccinated this year (from September 2009)', 'vaccinated last year  
21  
22 (September 2008 - August 2009)', 'vaccinated 2-5 years ago', 'vaccinated >5 years ago' and 'never  
23  
24 vaccinated'. Vaccination status was then re-categorised as a binary variable comprising 'vaccinated this  
25  
26 year' and 'unvaccinated', which included all other categories, to recognise that vaccinations in previous  
27  
28 seasons would not protect against the new circulating pandemic influenza strain. Medical records were  
29  
30 reviewed for details of the current admission and to confirm data on potential confounding factors.  
31  
32  
33 Combined nasopharyngeal and throat swabs were taken from each participant, placed in viral transport  
34  
35 medium and transported to the laboratory for storage at -80°C. Samples were tested for the presence of  
36  
37 influenza virus RNA using a validated in house real-time PCR with a lower limit of detection of 1 RNA  
38  
39 copy per reaction, as previously described<sup>12</sup>. A single serum sample was taken for quantification of IgA  
40  
41 antibodies to influenza A as a marker of recent exposure (as IgA levels peak at around 2 weeks after  
42  
43 exposure and reach baseline by around 4-6 weeks). Serum samples were centrifuged, frozen at -80°C  
44  
45 and batch tested using a commercially available enzyme-linked immunosorbent assay (EIA) for influenza  
46  
47 A IgA (Biosupply UK, cat no. RE56501). Antibody concentrations were initially explored as a continuous  
48  
49 variable, then categorised into 'positive' (>12 U/ml), 'equivocal' (8-12 U/ml) and 'negative' (>8 U/ml)  
50  
51 categories based on standard laboratory thresholds. Equivocal results were dropped for analyses.  
52  
53  
54  
55  
56  
57  
58  
59  
60

## Statistical methods

All analyses were carried out using Stata (*Stata Statistical Software: Release 12. College Station, TX: StataCorp LP*). Baseline comparability between cases and controls was assessed with  $\chi^2$  tests.

Characteristics of participants with and without missing data were also compared using  $\chi^2$  tests to assess any risk of bias associated with missing data. We used multivariable logistic regression analysis to investigate associations between recent influenza-like illness or acute respiratory illness exposures and case/ control status, controlling for the frequency-matching factors age-group, gender and month of admission and influenza vaccination status as an a priori confounder (all models) as well as for other potential confounding factors. An additional multivariable model in which influenza vaccination status was the main exposure was generated using the same approach. Potential confounders were examined using a backwards stepwise approach whereby factors independently associated with both exposure and outcome were included in models and likelihood ratio tests used to assess the effect of removing each one sequentially. If p values from likelihood ratio tests were  $<0.1$  then factors were retained in the model.

## RESULTS

### Characteristics of study participants

134 participants were recruited, who comprised 70 cases from 106 approached (acceptance rate 66%) and 64 controls from 95 approached (acceptance rate 67%). Reasons for non-participation included lack of time, unwillingness to experience additional procedures and feeling tired or unwell. The median age of participants was 63.6 years (IQR 53.3-72.6) and 21% were female. Cases were more likely to be of Asian or Asian British ethnicity ( $p=0.016$ ), to have a previous history of myocardial infarction ( $p=0.04$ ) or a family history of myocardial infarction ( $p<0.001$ ) than controls. Of the 70 patients hospitalised for acute myocardial infarction, 48 (68.5%) met criteria for ST-elevation myocardial infarction, 17 (24.3%)

1  
2  
3 had a non ST-elevation myocardial infarction and in 5 (7.1%) cases the subtype of myocardial infarction  
4  
5 was unspecified. Control patients were admitted with a range of acute non-vascular surgical  
6  
7 presentations that included colorectal, urological and orthopaedic conditions.  
8  
9

10  
11 **Table 1**

12  
13  
14 **Timing of participants' admissions in relation to national influenza circulation**

15  
16  
17 A comparison of study participants' dates of admission with national rates of GP consultations for  
18  
19 influenza-like illness (ILI) based on RCGP surveillance data is shown in figure 1. The peak week for ILI  
20  
21 consultations in England was week 43 (ending 25<sup>th</sup> October 2009) when the rate was 42.8 per 100,000.  
22  
23 This was also the peak week for influenza virus circulation according to data from virological sentinel  
24  
25 surveillance schemes, when the proportion of positive samples reached 41.2%. Our recruitment period  
26  
27 spanned this period of peak influenza circulation.  
28  
29

30  
31  
32 **Figure 1**

33  
34 **Recent respiratory and influenza-like illness**

35  
36  
37 17 cases (24.3%) and 12 controls (18.8%) reported respiratory illness in the month preceding hospital  
38  
39 admission. 13 illnesses – reported by 10 cases (14.3%) and 3 controls (4.7%) – met criteria for influenza-  
40  
41 like illness (defined as feeling feverish with cough and/or sore throat). The most frequently reported  
42  
43 category for the timing of respiratory symptom onset was 8-14 days before admission (31.0% of  
44  
45 illnesses). 4-7 days was the most frequently reported category for length of illness (37.9% of illnesses).  
46  
47 Symptom profiles of participants reporting recent respiratory illness are shown in figure 2. No swabs  
48  
49 tested positive for influenza virus nucleic acid. Serum samples were available on 113 of 134 participants  
50  
51 (84.3%). There were no significant differences in characteristics of participants with and without missing  
52  
53 serum samples (data not shown). 25 cases (43.1%) and 28 controls (50.9%) tested positive for serum  
54  
55  
56  
57  
58  
59  
60

1  
2  
3 influenza A IgA antibodies. 62% of participants who were seropositive had received influenza  
4  
5 vaccination during the study period compared to 31% of seronegative participants. Overall 44.0% of  
6  
7 participants were vaccinated. The proportion of participants recruited in each month who were  
8  
9 vaccinated increased from 0% in September 2009, to 29.6% in October 2009, 44.8% in November 2009,  
10  
11 55.0% in December 2009, 72.0% in January 2010 and was 50% in February 2010.  
12  
13

### 14 15 16 **Figure 2**

17  
18 Cases were more likely to have reported influenza-like illness than controls – adjusted OR 3.17 (95%  
19  
20 confidence interval 0.61-16.47) – as well as other key respiratory illness symptoms, although differences  
21  
22 were not statistically significant. Results from this logistic regression analysis are summarised in table 2.  
23  
24 There was also a trend towards a protective effect of influenza vaccination against myocardial infarction  
25  
26 – adjusted OR 0.46 (95% CI, 0.19-1.12) – after controlling for age-group, gender, month of admission and  
27  
28 personal history of AMI.  
29  
30  
31  
32

### 33 **Table 2**

## 34 35 36 **DISCUSSION**

37  
38 The study was supportive of the hypothesis that recent respiratory and in particular influenza-like  
39  
40 illnesses occurring during the second wave of the influenza A H1N1 pandemic were more common in  
41  
42 patients hospitalised with acute myocardial infarction than with acute surgical conditions. Influenza  
43  
44 vaccination was also associated with protection against myocardial infarction, although differences were  
45  
46 not statistically significant. While we had hypothesised that more adults would be infected during the  
47  
48 second pandemic wave due to the expected upwards shift in age distribution of infections, national  
49  
50 rates of influenza-like illness remained low<sup>5</sup>, especially in age groups typically affected by acute  
51  
52 myocardial infarction. The study was therefore underpowered to detect an effect, partly due to limited  
53  
54 numbers of infections among participants.  
55  
56  
57  
58  
59  
60

1  
2  
3  
4  
5  
6  
7 Using self-reported recent respiratory and influenza-like illness as exposures introduced the possibility  
8  
9 of reporting or recall bias. Nonetheless this method allows greater sensitivity to detect recent  
10  
11 respiratory symptoms than relying on reports of medically attended illnesses, which comprise only a  
12  
13 small minority of influenza cases<sup>13</sup>. As cases and controls were frequency matched on week of  
14  
15 admission, external factors such as media coverage of the influenza pandemic should not have had a  
16  
17 differential effect on respiratory illness reporting. We chose to test both nasopharyngeal and throat  
18  
19 swabs to increase the sensitivity of virus detection. It was perhaps unsurprising, however, that none of  
20  
21 the nasopharyngeal and throat swabs was positive for influenza virus given a) the low rates of infection  
22  
23 in this age-group<sup>5</sup> and b) that the majority of viral shedding in influenza occurs in the first 2-3 days after  
24  
25 symptom onset<sup>14</sup> whereas most reported respiratory symptoms in study participants occurred 8-14 days  
26  
27 before admission. Based on our findings it seems unlikely that any delayed cardiac effect of influenza is  
28  
29 linked to ongoing or prolonged virus replication or shedding in the respiratory tract. Influenza serology  
30  
31 is difficult to interpret in vaccinated participants as it not possible to distinguish antibody rises caused by  
32  
33 infection from those caused by vaccination. Validation of the IgA assay used suggests it has acceptable  
34  
35 sensitivity and specificity to detect recent seasonal influenza A infection<sup>15</sup> but its effect with the  
36  
37 pandemic strain H1N1pdm09 is unclear. It has previously been noted that serological studies carried out  
38  
39 during the 2009 influenza pandemic were severely hampered by cross reactivity both with vaccine and  
40  
41 with seasonal influenza strains<sup>7</sup>.

42  
43  
44  
45  
46  
47  
48  
49  
50 Previous observational studies using large electronic primary care databases have found an association  
51  
52 between GP consultation for acute respiratory infection in the last month and risk of acute myocardial  
53  
54 infarction<sup>16-18</sup>. Although studies were conducted over different time periods, they encompassed the  
55  
56 effect of varying seasonal influenza strains. **In the present study, we controlled for important potential**  
57  
58  
59  
60



1  
2  
3  
4  
5  
6  
7  
8  
9  
10  
11  
12  
13  
14  
15  
16  
17  
18  
19  
20  
21  
22  
23  
24  
25  
26  
27  
28  
29  
30  
31  
32  
33  
34  
35  
36  
37  
38  
39  
40  
41  
42  
43  
44  
45  
46  
47  
48  
49  
50  
51  
52  
53  
54  
55  
56  
57  
58  
59  
60

confounders such as influenza vaccination status, and showed that statin use was equally prevalent in cases and controls. We did not, however, have complete data on other drugs that have been hypothesised to have immune-regulatory effects (such as ACE inhibitors ,angiotensin receptor blockers (ARBs), metformin, glitazones and fibrates). If these agents reduce the likelihood of people experiencing ILI and were more commonly used in cases than controls they could potentially have confounded the relationship between ILI and AMI. It was reassuring, however, that our results were consistent with those obtained in our recent self-controlled case series study - a design that implicitly controls for fixed confounders. In this study we used linked primary care and cardiac disease registry records from 3,927 patients from 2003-2009, which also included acute respiratory infection consultations occurring during the first wave of H1N1pdm09 circulation<sup>19</sup>. We found an incidence ratio for acute myocardial infarction of 4.19 (95% confidence interval 3.18-5.53) in the first 1-3 days after acute respiratory infection, with the risk falling to baseline after 28 days<sup>19</sup>. Elderly people and those consulting for an infection judged most likely to be due to influenza were at greatest risk. During the 2009 influenza pandemic people with underlying cardiovascular disease were much more likely to be hospitalised<sup>13</sup> and to die<sup>20</sup> from a range of causes attributable to pandemic influenza. Although most deaths from H1N1pdm09 occurred in younger people, this was partly a function of the age distribution of infections: in the UK the case fatality rate in the elderly was much higher than in younger age-groups<sup>5</sup> but overall numbers of deaths were small as few elderly people were infected.

Various biological mechanisms are proposed to underlie a relationship between influenza or acute respiratory infection and myocardial infarction<sup>21</sup>. Acute respiratory infections may result in a host of acute inflammatory and haemostatic effects leading to systemic inflammation, altered plasma viscosity, coagulability and haemodynamic changes<sup>22</sup> as well as promoting local endothelial dysfunction, coronary

1  
2  
3 inflammation and plaque rupture<sup>23</sup>. Immobility associated with bed-rest and dehydration might  
4  
5 potentiate these processes.  
6  
7  
8  
9

10 In conclusion, this study suggests that recent ILI occurring during the 2009 influenza pandemic was more  
11  
12 common in AMI patients. Taken in the context of previous work, this helps to support the hypothesis  
13  
14 that, as with other influenza strains, H1N1pdm09 could potentially trigger AMI in vulnerable groups. It  
15  
16 is likely, however, that the effect is not specific to influenza and could have also been due to other  
17  
18 viruses circulating at the time. The population impact of H1N1pdm09 on rates of hospitalisations and  
19  
20 deaths from myocardial infarction is also likely to have been relatively low given the mismatch between  
21  
22 the ages of those typically affected by H1N1pdm09 and acute coronary events as well as the relatively  
23  
24 mild clinical effects of this influenza strain.  
25  
26  
27  
28  
29  
30

### 31 **Acknowledgments**

32  
33  
34 We thank all patients who agreed to participate in this study and nurses on the cardiology and surgical  
35  
36 wards at the Royal Free Hospital who helped to identify potential participants. We acknowledge Mauli  
37  
38 Patel at the Royal Free Virology Laboratory who kindly processed, stored and tested samples.  
39  
40  
41

### 42 **Contributors**

43  
44  
45 CWG conceived and designed the study, recruited participants, collected and analysed data and wrote  
46  
47 the manuscript. AMG, GH, RDR, LS and ACH assisted with study design. AMG provided laboratory  
48  
49 resources. CWG, AMG, RDR, LS and ACH interpreted results. AMG, GH, RDR, LS and ACH critically  
50  
51 revised the manuscript for intellectual content. LS and ACH provided supervision. All authors approved  
52  
53 the final version of the manuscript.  
54  
55  
56

### 57 **Funding statement**

This work was funded by a Medical Research Council Clinical Research Training Fellowship for CWG, grant number G0800689. LS is supported by a Wellcome Trust Senior Research Fellowship in Clinical Science, grant number 098504/Z/12/Z.

### Competing interests statement

None declared

### Data sharing statement

No additional data are available

### References

1. Cox NJ, Subbarao K (1999) Influenza. *The Lancet* 354: 1277–1282.
2. Warren-Gash C, Smeeth L, Hayward AC (2009) Influenza as a trigger for acute myocardial infarction or death from cardiovascular disease: a systematic review. *The Lancet Infectious Diseases* 9: 601–610.
3. Swine influenza A (H1N1) infection in two children – Southern California, March–April 2009 (2009). *MMWR Morb Mortal Wkly Rep* 58: 400–402.
4. Outbreak of swine-origin influenza A (H1N1) virus infection – Mexico, March–April 2009 (2009). *MMWR Morb Mortal Wkly Rep* 58: 467–470.
5. Health Protection Agency (2010) Epidemiological report of pandemic (H1N1) 2009 in the United Kingdom: April 2009 - May 2010.
6. McLean E, Pebody RG, Campbell C, Chamberland M, Hawkins C, et al. (2010) Pandemic (H1N1) 2009 influenza in the UK: clinical and epidemiological findings from the first few hundred (FF100) cases. *Epidemiol Infect* 138: 1531–1541.
7. Lagacé-Wiens PRS, Rubinstein E, Gumel A (2010) Influenza epidemiology – past, present, and future. *Crit Care Med* 38: e1–e9.
8. Chacko B, Peter JV, Pichamuthu K, Ramakrishna K, Moorthy M, et al. (2012) Cardiac manifestations in patients with pandemic (H1N1) 2009 virus infection needing intensive care. *J Crit Care* 27: 106.e1–6.
9. Martin SS, Hollingsworth CL, Norfolk SG, Wolfe CR, Hollingsworth JW. (2010) Reversible cardiac dysfunction associated with pandemic 2009 influenza A (H1N1). *Chest* 137: 1195–7.
10. Lee N, Chan PKS, Lui GCY, Wong BCK, Sin WWY, et al. (2011) Complications and Outcomes of Pandemic 2009 Influenza A (H1N1) Virus Infection in Hospitalized Adults: How Do They Differ From Those in Seasonal Influenza? *J Infect Dis* 203: 1739–1747.
11. Dawood FS, Iuliano AD, Reed C, Meltzer MI, Shay DK, et al. (2012) Estimated global mortality associated with the first 12 months of 2009 pandemic influenza A H1N1 virus circulation: a modelling study. *The Lancet Infectious Diseases* 12: 687–695.
12. Khanom AB, Velvin C, Hawrami K, Schutten M, Patel M, et al. (2011) Performance of a nurse-led paediatric point of care service for respiratory syncytial virus testing in secondary care. *J Infect* 62: 52–58.

13. Campbell CNJ, Mytton OT, McLean EM, Rutter PD, Pebody RG, et al. (2010) Hospitalization in two waves of pandemic influenza A(H1N1) in England. *Epidemiology & Infection* 139: 1560–1569.
14. Lau LLH, Cowling BJ, Fang VJ, Chan K-H, Lau EHY, et al. (2010) Viral shedding and clinical illness in naturally acquired influenza virus infections. *J Infect Dis* 201: 1509–1516.
15. Rothbarth PH, Groen J, Bohnen AM, De Groot R, Osterhaus AD (1999) Influenza virus serology – a comparative study. *J Virol Methods* 78: 163–169.
16. Smeeth L, Thomas SL, Hall AJ, Hubbard R, Farrington P, et al. (2004) Risk of myocardial infarction and stroke after acute infection or vaccination. *New England Journal of Medicine* 351: 2611–2618.
17. Clayton TC, Thompson M, Meade TW (2008) Recent respiratory infection and risk of cardiovascular disease: case-control study through a general practice database. *Eur Heart J* 29: 96–103.
18. Meier CR, Jick SS, Derby LE, Vasilakis C, Jick H, et al. (1998) Acute respiratory-tract infections and risk of first-time acute myocardial infarction. *The Lancet* 351: 1467–1471.
19. Warren-Gash C, Hayward AC, Hemingway H, Denaxas S, Thomas SL, et al. (2012) Influenza infection and risk of acute myocardial infarction in England and Wales: a CALIBER self-controlled case series study. *J Infect Dis* 206: 1652–1659.
20. Mytton OT, Rutter PD, Mak M, Stanton E, Sachedina N, et al. (2012) Mortality due to pandemic (H1N1) 2009 influenza in England: a comparison of the first and second waves. *Epidemiology & Infection* 140: 1533–1541.
21. Bazaz R, Marriott HM, Francis SE, Dockrell DH (2013) Mechanistic links between acute respiratory tract infections and acute coronary syndromes. *J Infect* 66: 1-17.
22. Harskamp RE, Van Ginkel MW (2008) Acute respiratory tract infections: a potential trigger for the acute coronary syndrome. *Annals of Medicine* 40: 121–128.
23. Vallance P, Collier J, Bhagat K (1997) Infection, inflammation, and infarction: does acute endothelial dysfunction provide a link? *The Lancet* 349: 1391–1392.

### Figure legends

**Figure 1** Number of study participants admitted by influenza surveillance week compared to weekly ILI rates per 100,000 based on national RCGP surveillance data

**Figure 2** Percentage of cases (n=70) and controls (n=64) reporting various symptoms during respiratory illness

| Characteristic                            | Category               | Cases (n=70) | Controls (n=64) | P value |
|-------------------------------------------|------------------------|--------------|-----------------|---------|
| Age group                                 | 40-49                  | 8 (11.4)     | 13 (20.3)       | 0.61    |
|                                           | 50-59                  | 19 (27.1)    | 18 (28.1)       |         |
|                                           | 60-69                  | 19 (27.1)    | 15 (23.4)       |         |
|                                           | 70-79                  | 17 (24.3)    | 11 (17.2)       |         |
|                                           | 80+                    | 7 (10.0)     | 7 (10.9)        |         |
| Gender                                    | Female                 | 13 (18.6)    | 15 (23.4)       | 0.49    |
|                                           | Male                   | 57 (81.4)    | 49 (76.6)       |         |
| Admission month                           | September              | 8 (11.4)     | 7 (10.9)        | 0.92    |
|                                           | October                | 12 (17.1)    | 15 (23.4)       |         |
|                                           | November               | 15 (21.4)    | 14 (21.9)       |         |
|                                           | December               | 10 (14.3)    | 10 (15.6)       |         |
|                                           | January                | 14 (20.0)    | 11 (17.2)       |         |
|                                           | February               | 11 (15.7)    | 7 (10.9)        |         |
| Ethnicity                                 | Asian or Asian British | 18 (25.7)    | 6 (9.4)         | 0.03    |
|                                           | Black or Black British | 2 (2.9)      | 0 (0.0)         |         |
|                                           | Mixed                  | 0 (0.0)      | 1 (1.6)         |         |
|                                           | White                  | 50 (71.4)    | 57 (89.1)       |         |
| BMI category                              | 18.5-24.9              | 20 (30.8)    | 23 (39.0)       | 0.41    |
|                                           | 25.0-29.9              | 36 (55.4)    | 24 (40.7)       |         |
|                                           | 30.0-39.9              | 8 (12.3)     | 10 (17.0)       |         |
|                                           | 40.0-max               | 1 (1.5)      | 2 (3.4)         |         |
| Smoker                                    | No never               | 22 (31.4)    | 23 (35.9)       | 0.77    |
|                                           | Yes current            | 27 (38.6)    | 21 (32.8)       |         |
|                                           | Yes ex                 | 21 (30.0)    | 20 (31.3)       |         |
| Past medical history                      | Hypercholesterolaemia* | 34 (48.6)    | 28 (43.8)       | 0.58    |
|                                           | Diabetes               | 14 (20.0)    | 12 (18.8)       | 0.86    |
|                                           | Hypertension           | 37 (52.9)    | 26 (40.6)       | 0.16    |
|                                           | AMI                    | 14 (20.0)    | 5 (7.8)         | 0.04    |
|                                           | Stroke                 | 1 (1.4)      | 4 (6.3)         | 0.14    |
| Family history                            | AMI                    | 43 (61.4)    | 19 (29.7)       | <0.001  |
|                                           | Stroke                 | 5 (7.1)      | 6 (9.4)         | 0.64    |
| Influenza vaccination status <sup>†</sup> | Vaccinated             | 30 (42.9)    | 29 (45.3)       | 0.78    |

**Table 1** Characteristics of study participants (n=134)

\*28 cases (40%) and 25 controls (39%) with hypercholesterolaemia reported current statin use

<sup>†</sup>'Vaccinated' refers to receiving influenza vaccination in the current vaccination year (since September 2009).

| Exposure variable                          | Prevalence – cases, n(%) | Prevalence – controls, n(%) | Unadjusted odds ratio (95% CI) | Adjusted odds ratio* (95% CI) |
|--------------------------------------------|--------------------------|-----------------------------|--------------------------------|-------------------------------|
| 1. Respiratory illness                     | 17 (24.3)                | 12 (18.8)                   | 1.39 (0.60-3.19)               | 1.39 (0.56-3.47)              |
| 2. Influenza-like illness                  | 10 (14.3)                | 3 (4.7)                     | 3.39 (0.89-12.92)              | 3.17 (0.61-16.47)             |
| 3. Fever                                   | 11 (15.7)                | 4 (6.3)                     | 2.80 (0.84-9.28)               | 2.42 (0.54-10.98)             |
| 4. Cough                                   | 21 (30.0)                | 10 (15.6)                   | 2.31 (0.99-5.40)               | 2.04 (0.76-5.47)              |
| 5. Sore throat                             | 10 (14.3)                | 8 (12.5)                    | 1.17 (0.43-3.17)               | 1.43 (0.44-4.69)              |
| 6. Muscle ache                             | 8 (11.4)                 | 5 (7.8)                     | 1.52 (0.47-4.92)               | 2.29 (0.59-8.92)              |
| 7. Influenza A IgA antibodies <sup>‡</sup> | 25 (46.3)                | 28 (54.9)                   | 0.71 (0.33-1.53)               | 0.82 (0.34-2.00)              |

**Table 2** Odds ratios for the association between acute myocardial infarction and various respiratory illness exposure variables, unadjusted and adjusted

\*Adjustments were made for age-group, gender, month of admission and influenza vaccination status (all exposures), family history of myocardial infarction (exposures 2, 3, 4 & 5) and personal history of myocardial infarction (exposures 2, 3, 4 & 5)

<sup>‡</sup>Note that n=105 (54 cases and 51 controls) for influenza antibodies where 8 equivocal results were excluded, compared to n=134 (70 cases and 64 controls) for all other exposures.

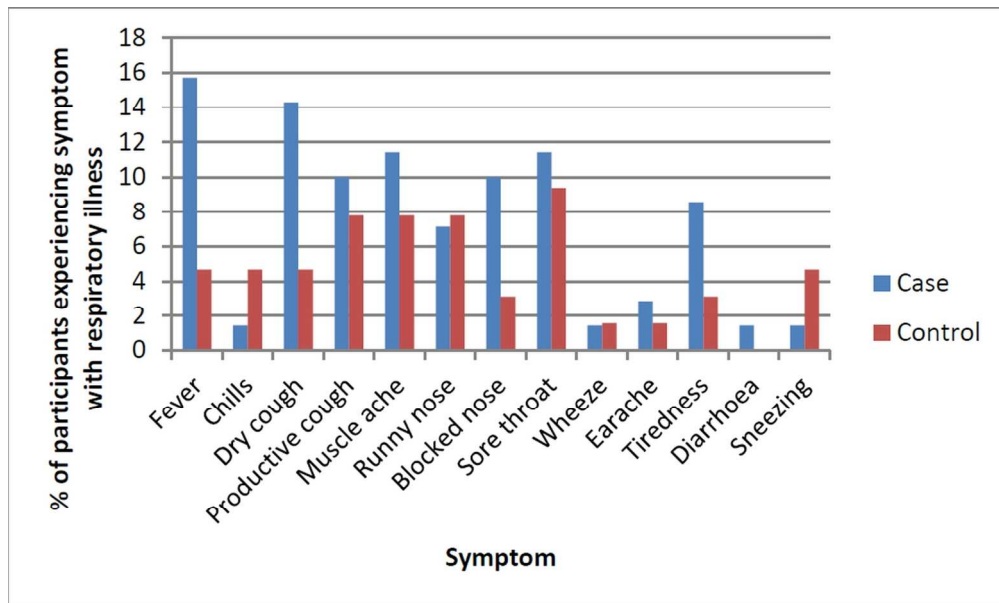

Percentage of cases (n=70) and controls (n=64) reporting various symptoms during respiratory illness  
150x90mm (300 x 300 DPI)

Review only

STROBE Statement—Checklist of items that should be included in reports of *case-control studies*

|                          | Item No | Recommendation                                                                                                                                                                       | Reported on page no.                                                                                  |
|--------------------------|---------|--------------------------------------------------------------------------------------------------------------------------------------------------------------------------------------|-------------------------------------------------------------------------------------------------------|
| Title and abstract       | 1       | (a) Indicate the study's design with a commonly used term in the title or the abstract                                                                                               | 1                                                                                                     |
|                          |         | (b) Provide in the abstract an informative and balanced summary of what was done and what was found                                                                                  | 2                                                                                                     |
| <b>Introduction</b>      |         |                                                                                                                                                                                      |                                                                                                       |
| Background/rationale     | 2       | Explain the scientific background and rationale for the investigation being reported                                                                                                 | 4                                                                                                     |
| Objectives               | 3       | State specific objectives, including any prespecified hypotheses                                                                                                                     | 5                                                                                                     |
| <b>Methods</b>           |         |                                                                                                                                                                                      |                                                                                                       |
| Study design             | 4       | Present key elements of study design early in the paper                                                                                                                              | 5                                                                                                     |
| Setting                  | 5       | Describe the setting, locations, and relevant dates, including periods of recruitment, exposure, follow-up, and data collection                                                      | 5-6                                                                                                   |
| Participants             | 6       | (a) Give the eligibility criteria, and the sources and methods of case ascertainment and control selection. Give the rationale for the choice of cases and controls                  | 5                                                                                                     |
|                          |         | (b) For matched studies, give matching criteria and the number of controls per case                                                                                                  | Frequency matching criteria given on p5                                                               |
| Variables                | 7       | Clearly define all outcomes, exposures, predictors, potential confounders, and effect modifiers. Give diagnostic criteria, if applicable                                             | 5-7                                                                                                   |
| Data sources/measurement | 8*      | For each variable of interest, give sources of data and details of methods of assessment (measurement). Describe comparability of assessment methods if there is more than one group | 6                                                                                                     |
| Bias                     | 9       | Describe any efforts to address potential sources of bias                                                                                                                            | 6                                                                                                     |
| Study size               | 10      | Explain how the study size was arrived at                                                                                                                                            | Study size based on numbers of eligible patients hospitalised during the influenza circulation period |
| Quantitative variables   | 11      | Explain how quantitative variables were handled in the analyses. If applicable, describe which groupings were chosen and why                                                         | 6                                                                                                     |
| Statistical methods      | 12      | (a) Describe all statistical methods, including those used to control for confounding                                                                                                | 6-7                                                                                                   |
|                          |         | (b) Describe any methods used to examine subgroups and interactions                                                                                                                  | N/A                                                                                                   |
|                          |         | (c) Explain how missing data were addressed                                                                                                                                          | 6                                                                                                     |
|                          |         | (d) If applicable, explain how matching of cases and controls was addressed                                                                                                          | N/A                                                                                                   |



|                  |     |                                                                                                                                                                                                              |                                                                                                                              |
|------------------|-----|--------------------------------------------------------------------------------------------------------------------------------------------------------------------------------------------------------------|------------------------------------------------------------------------------------------------------------------------------|
|                  |     | (e) Describe any sensitivity analyses                                                                                                                                                                        | N/A                                                                                                                          |
| <b>Results</b>   |     |                                                                                                                                                                                                              |                                                                                                                              |
| Participants     | 13* | (a) Report numbers of individuals at each stage of study—eg numbers potentially eligible, examined for eligibility, confirmed eligible, included in the study, completing follow-up, and analysed            | 7                                                                                                                            |
|                  |     | (b) Give reasons for non-participation at each stage                                                                                                                                                         | Data not systematically collected but reasons for non-participation include lack of time and feeling unwell during admission |
|                  |     | (c) Consider use of a flow diagram                                                                                                                                                                           | Not done as no follow up with this study design. Fig 1 shows recruitment over time.                                          |
| Descriptive data | 14* | (a) Give characteristics of study participants (eg demographic, clinical, social) and information on exposures and potential confounders                                                                     | Table 1                                                                                                                      |
|                  |     | (b) Indicate number of participants with missing data for each variable of interest                                                                                                                          | Table 1 and p8                                                                                                               |
| Outcome data     | 15* | Report numbers in each exposure category, or summary measures of exposure                                                                                                                                    | 8                                                                                                                            |
| Main results     | 16  | (a) Give unadjusted estimates and, if applicable, confounder-adjusted estimates and their precision (eg, 95% confidence interval). Make clear which confounders were adjusted for and why they were included | Table 2                                                                                                                      |
|                  |     | (b) Report category boundaries when continuous variables were categorized                                                                                                                                    | 6                                                                                                                            |
|                  |     | (c) If relevant, consider translating estimates of relative risk into absolute risk for a meaningful time period                                                                                             | N/A                                                                                                                          |

|                          |    |                                                                                                                                                                            |      |
|--------------------------|----|----------------------------------------------------------------------------------------------------------------------------------------------------------------------------|------|
| Other analyses           | 17 | Report other analyses done—eg analyses of subgroups and interactions, and sensitivity analyses                                                                             | N/A  |
| <b>Discussion</b>        |    |                                                                                                                                                                            |      |
| Key results              | 18 | Summarise key results with reference to study objectives                                                                                                                   | 9    |
| Limitations              | 19 | Discuss limitations of the study, taking into account sources of potential bias or imprecision. Discuss both direction and magnitude of any potential bias                 | 9-10 |
| Interpretation           | 20 | Give a cautious overall interpretation of results considering objectives, limitations, multiplicity of analyses, results from similar studies, and other relevant evidence | 11   |
| Generalisability         | 21 | Discuss the generalisability (external validity) of the study results                                                                                                      | 11   |
| <b>Other information</b> |    |                                                                                                                                                                            |      |
| Funding                  | 22 | Give the source of funding and the role of the funders for the present study and, if applicable, for the original study on which the present article is based              | 12   |

\*Give information separately for cases and controls.

**Note:** An Explanation and Elaboration article discusses each checklist item and gives methodological background and published examples of transparent reporting. The STROBE checklist is best used in conjunction with this article (freely available on the Web sites of PLoS Medicine at <http://www.plosmedicine.org/>, Annals of Internal Medicine at <http://www.annals.org/>, and Epidemiology at <http://www.epidem.com/>). Information on the STROBE Initiative is available at <http://www.strobe-statement.org>.
